# Supplementary material for: Trajectory patterns and factors influencing perinatal fatigue among Chinese women from late pregnancy to 6 months after delivery
Source: PeerJ. 2022 May 26;10:e13387. doi: 10.7717/peerj.13387 (PMC9148558; doi:10.7717/peerj.13387)
Supplement: Supplemental Information 1 [file peerj-10-13387-s001.xlsx]

## Sheet: data base for perintal fatigue
Number of Samples	GMM2C(1=persistently high group,0=persistently low group)	Fatigue at T0 (scores 0-39, m=missing data)	Fatigue at T1(scores 0-39, m=missing data)	Fatigue at T2(scores 0-39, m=missing data)	Fatigue at T3(scores 0-39, m=missing data)	Fatigue at T4(scores 0-39, m=missing data)	Fatigue at T5(scores 0-39, m=missing data)	T1-T0 Fatigue(m=missing)	T2-T1 Fatigue(m=missing)	T3-T2 Fatigue(m=missing)	T4-T3 Fatigue(m=missing)	T5-T4 Fatigue(m=missing)	Age(range 18~42, m=missing)	Parity(1=primipara, 2=multipara, m=missing)	Employment(1=empolyed, 0=unemployed, m=missing)	Education Level(1="<college",2="college", 3=">college", m=missing)	Monthly family Income(1="<￥10,000", 2="￥10,000~20,000", 3=">￥20,000", m=missing)	Residency(1=Urban, 2=Suburban, m=missing)	Planned Pregnancy(1=planned, 0=unplanned, m=missing)	Prenatal Training (1=yes, 0=no, m=missing)	Sleep Duration(1="<six", 2=six~eight, 3=">eight", m=missing)	Sleep Quality(range 0~10, m=missing)	Fetus Gender(1=boys, 2=girls, m=missing)	Height(range 1.50~1.80, m=missing)	Prenatal Weight(range 36.0~90.0, m=missing)	Prenatal BMI(range 13.06~33.91, m=missing)	Weight at T0(range 42.4~94.00, m=missing)	BMI at T0(range 15.06~36.57, m=missing)	Weight Gain at T0(range -13.0~48.5, m=missing)	BMI Gain at T0(range -4.45~9.10, m=missing)	Gestation at enrollment(range 27.00~31.14, m=missing)	Complication(1=yes, 2=no, m=missing)	Pain(score 0~10, m=missing)	Anxiety(range 1~4, m=missing)	Difficult Baby Care(1=yes, 0=no, m=missing)	Exclusive Breastfeeding((1=yes, 0=no, m=missing)	T5 Weight(range 37.00~90.00, m=missing)	BMI at T5(range 14.27~33.20, m=missing)	Weight Gain at T5(range -20.00~23.50, m=missing)	BMI Gain at T5(range -7.53~9.18, m=missing)	Weight Retention at T5((1=yes, 0=no, m=missing)
1	0	1	2	m	m	m	3	1	m	m	m	m	35	1	1	3	2	1	1	1	2	7	m	1.58	65	26.0375	78	31.245	13	5.2075	29.5714	1	1	1	0	1	62	24.8358	-3	-1.20173	1
2	0	5	2	m	m	m	5	-3	m	m	m	m	27	1	0	3	3	1	1	0	3	8	m	1.55	52	21.6441	60	24.974	8	3.32986	28	2	1	1	0	1	52.5	21.8522	0.5	0.208117	0
3	1	6	6	5	35	18	25	0	-1	30	-17	7	31	1	1	3	3	1	1	1	3	8	2	1.6	58.5	22.8516	70.5	27.5391	12	4.6875	29.2857	1	1	2	0	1	66.5	25.9766	8	3.125	0
8	0	7	13	25	13	3	m	6	12	-12	-10	m	29	1	1	3	3	1	1	0	2	8	1	1.62	55	20.9572	67	25.5296	12	4.57247	29.2857	2	5	3	m	m	m	m	m	m	m
9	0	3	4	7	24	4	6	1	3	17	-20	2	30	1	1	3	3	1	1	0	2	7	1	1.59	42.7	16.8902	49.8	19.6986	7.1	2.80843	27.7143	2	2	1	1	1	48	18.9866	5.3	2.09644	0
10	0	7	11	10	7	m	1	4	-1	-3	m	m	32	1	1	2	3	1	1	0	3	8	1	1.6	52.3	20.4297	60.3	23.5547	8	3.125	29.4286	2	3	3	0	1	m	m	m	m	m
12	0	18	13	14	17	m	m	-5	1	3	m	m	32	1	1	3	3	1	1	0	2	6	1	1.63	54.7	20.5879	63	23.7118	8.3	3.12394	29.1429	2	m	3	m	m	m	m	m	m	m
15	1	31	m	22	m	m	21	m	m	m	m	m	28	1	0	2	2	1	1	0	2	6	2	1.69	55	19.257	64	22.4082	9	3.15115	29.1429	m	m	m	0	0	56	19.6072	1	0.350128	0
16	0	9	16	12	6	3	m	7	-4	-6	-3	m	22	1	1	1	2	1	0	1	1	5	1	1.63	46	17.3134	55	20.7008	9	3.38741	28	2	5	4	m	m	m	m	m	m	m
17	0	6	5	1	7	1	m	-1	-4	6	-6	m	26	1	1	3	3	1	1	1	2	8	1	1.58	49	19.6283	60	24.0346	11	4.40635	28.1429	2	3	2	m	m	m	m	m	m	m
19	0	12	25	21	4	11	m	13	-4	-17	7	m	27	1	1	2	3	1	1	0	2	7	1	1.65	59	21.6713	63.5	23.3242	4.5	1.65289	29	2	3	4	m	m	m	m	m	m	m
21	0	15	15	30	6	4	m	0	15	-24	-2	m	28	1	0	3	2	1	0	0	3	8	2	1.7	69	23.8754	70	24.2215	1	0.346021	28.7143	2	5	3	m	m	m	m	m	m	m
22	0	5	m	10	5	15	m	m	m	-5	10	m	34	1	1	3	3	1	1	0	2	7	1	1.7	78	26.9896	84	29.0657	6	2.07612	28	m	m	m	m	m	m	m	m	m	m
23	0	7	9	25	21	11	m	2	16	-4	-10	m	30	1	1	3	3	1	1	0	2	7	2	1.6	55	21.4844	60.5	23.6328	5.5	2.14844	28.5714	2	m	2	m	m	m	m	m	m	m
24	0	12	29	11	19	3	m	17	-18	8	-16	m	28	1	0	2	2	1	1	0	2	7	1	1.52	41.5	17.9623	50	21.6413	8.5	3.67902	28.2857	2	6	4	m	m	m	m	m	m	m
25	0	4	12	27	9	7	m	8	15	-18	-2	m	33	1	1	3	3	1	1	0	2	8	1	1.68	56	19.8413	64.5	22.8529	8.5	3.01162	27	2	m	3	m	m	m	m	m	m	m
26	0	8	12	4	13	5	m	4	-8	9	-8	m	24	1	1	1	3	1	0	0	2	8	2	1.68	66	23.3844	77.4	27.4235	11.4	4.03912	28.2857	2	0	3	m	m	m	m	m	m	m
27	0	16	15	10	17	5	m	-1	-5	7	-12	m	33	2	1	3	3	1	1	1	2	8	1	1.55	46	19.1467	55	22.8928	9	3.7461	27.7143	2	m	3	m	m	m	m	m	m	m
28	0	12	20	9	11	m	14	8	-11	2	m	m	31	2	1	2	2	1	0	1	3	8	1	1.65	73	26.8136	88	32.3232	15	5.50964	30.2857	1	0	4	0	1	73.5	26.9972	0.5	0.183655	0
29	0	10	20	14	4	2	m	10	-6	-10	-2	m	33	1	1	3	3	1	1	0	3	7	1	1.66	58	21.048	69	25.0399	11	3.99187	28.7143	2	3	4	m	m	m	m	m	m	m
30	0	5	12	28	8	13	m	7	16	-20	5	m	30	1	1	2	3	1	1	0	3	9	2	1.58	51.5	20.6297	58.5	23.4337	7	2.80404	28.2857	1	4	3	m	m	m	m	m	m	m
31	0	5	14	22	22	11	7	9	8	0	-11	-4	34	1	0	3	3	1	1	0	2	8	1	1.65	53	19.4674	58	21.3039	5	1.83655	27.8571	2	m	3	1	1	54	19.8347	1	0.367309	0
33	0	3	3	6	7	4	7	0	3	1	-3	3	26	1	1	3	3	1	0	0	2	9	1	1.66	62	22.4996	67	24.3141	5	1.81449	28.8571	2	3	1	0	0	62	22.4996	0	0	1
34	0	11	4	6	4	14	7	-7	2	-2	10	-7	31	1	1	3	2	1	1	1	2	7	1	1.68	48.5	17.184	57	20.1956	8.5	3.01162	29.4286	2	2	1	0	1	53.5	18.9555	5	1.77154	0
35	0	17	8	9	15	9	11	-9	1	6	-6	2	27	1	1	3	3	1	0	0	2	7	1	1.56	60	24.6548	65	26.7094	5	2.05457	29	2	2	2	0	0	68	27.9421	8	3.28731	0
36	1	15	6	28	28	m	21	-9	22	0	m	m	27	1	1	3	2	1	0	0	2	7	1	1.6	43.55	17.0117	53.5	20.8984	9.95	3.88672	m	2	1	2	1	1	47	18.3594	3.45	1.34766	0
37	0	19	21	25	8	7	m	2	4	-17	-1	m	24	1	1	2	2	1	1	1	3	8	1	1.67	56	20.0796	62.5	22.4103	6.5	2.33067	28.7143	2	0	4	m	m	m	m	m	m	m
39	0	15	6	13	7	4	5	-9	7	-6	-3	1	31	1	1	3	2	1	1	0	2	6	2	1.58	61.5	24.6355	68.5	27.4395	7	2.80404	28.5714	2	0	2	0	1	65	26.0375	3.5	1.40202	0
40	0	13	25	8	25	7	2	12	-17	17	-18	-5	32	1	1	3	3	1	1	0	3	7	2	1.58	61	24.4352	67	26.8386	6	2.40346	28	2	2	4	0	0	65	26.0375	4	1.60231	0
43	0	0	4	5	9	12	5	4	1	4	3	-7	23	1	0	1	1	1	1	0	3	9	2	1.72	62.1	20.9911	75	25.3515	12.9	4.36047	28.7143	2	0	1	0	0	70	23.6614	7.9	2.67036	0
44	0	13	17	26	28	4	12	4	9	2	-24	8	30	1	1	3	2	1	1	0	2	5	1	1.57	45	18.2563	55	22.3133	10	4.05696	28	2	1	4	0	0	46	18.662	1	0.405696	0
46	0	12	24	9	13	7	10	12	-15	4	-6	3	30	1	1	3	3	1	1	1	2	7	2	1.62	50	19.052	61	23.2434	11	4.19143	29.5714	2	3	4	0	0	54	20.5761	4	1.52416	0
48	0	14	m	22	12	3	11	m	m	-10	-9	8	37	1	1	3	3	1	1	0	3	8	1	1.6	47	18.3594	54	21.0938	7	2.73438	29	m	m	m	0	0	52	20.3125	5	1.95312	0
50	0	18	24	8	9	4	8	6	-16	1	-5	4	28	1	1	3	2	1	1	0	2	5	1	1.65	54.12	19.8788	60	22.0386	5.88	2.15978	28	1	0	4	1	0	50	18.3655	-4.12	-1.51331	1
52	0	0	12	6	4	14	4	12	-6	-2	10	-10	m	1	1	3	2	1	1	m	2	8	1	1.6	59.5	23.2422	59	23.0469	-0.5	-0.195312	28.7143	2	0	3	0	1	52.5	20.5078	-7	-2.73438	1
53	0	7	26	9	8	9	6	19	-17	-1	1	-3	36	1	1	2	1	1	1	0	2	7	2	1.7	60	20.7612	72	24.9135	12	4.15225	29.2857	2	0	4	0	1	70	24.2215	10	3.46021	0
54	0	4	2	2	0	m	7	-2	0	-2	m	m	28	1	1	3	3	1	1	0	2	8	1	1.6	52	20.3125	69	26.9531	17	6.64062	28	2	0	1	0	0	48	18.75	-4	-1.5625	1
55	0	8	17	17	3	17	4	9	0	-14	14	-13	29	1	1	3	2	1	1	0	2	8	1	1.68	56	19.8413	67	23.7387	11	3.89739	29	2	3	4	0	0	56	19.8413	0	0	1
56	1	10	13	m	30	17	m	3	m	m	-13	m	26	1	1	3	2	1	1	0	3	9	m	1.54	38.7	16.3181	48.8	20.5768	10.1	4.25873	29	2	0	3	m	m	m	m	m	m	m
57	0	8	14	14	m	m	15	6	0	m	m	m	29	1	1	3	3	1	1	1	3	9	2	1.63	59	22.2063	65	24.4646	6	2.25827	30.1429	2	0	3	1	1	59	22.2063	0	0	1
58	0	7	15	17	24	18	4	8	2	7	-6	-14	29	1	1	3	2	1	1	1	3	9	2	1.62	49.5	18.8615	57.5	21.9098	8	3.04832	29.7143	2	4	3	0	0	49	18.6709	-0.5	-0.19052	1
59	1	12	32	16	15	26	25	20	-16	-1	11	-1	27	1	1	3	2	1	1	0	2	6	1	1.67	48	17.2111	56	20.0796	8	2.86851	29	1	0	4	1	1	54	19.3625	6	2.15139	0
60	0	5	17	9	3	12	12	12	-8	-6	9	0	30	1	1	3	3	1	1	0	2	7	1	1.66	55	19.9594	63.5	23.044	8.5	3.08463	29.8571	2	1	4	0	0	55.5	20.1408	0.5	0.181449	0
62	0	6	27	10	10	7	0	21	-17	0	-3	-7	30	1	0	3	2	1	1	0	2	7	2	1.61	63.8	24.6132	72.3	27.8924	8.5	3.27919	28.7143	2	3	4	0	1	60	23.1473	-3.8	-1.46599	1
63	0	6	15	3	4	19	5	9	-12	1	15	-14	26	1	1	2	2	1	1	0	1	6	1	1.63	70	26.3465	76	28.6048	6	2.25827	30.4286	2	0	3	0	1	66	24.841	-4	-1.50551	1
64	0	5	2	4	3	m	7	-3	2	-1	m	m	30	2	1	3	3	1	1	0	2	10	m	1.66	48	17.4191	53	19.2336	5	1.81449	28.4286	2	0	1	1	1	50	18.1449	2	0.725795	0
65	0	1	23	12	6	m	1	22	-11	-6	m	m	28	1	1	2	3	1	0	0	1	8	2	1.65	45.5	16.7126	51.25	18.8246	5.75	2.11203	29.7143	2	0	4	0	0	50	18.3655	4.5	1.65289	0
66	1	13	36	15	14	m	20	23	-21	-1	m	m	34	1	1	3	2	1	1	0	2	7	1	1.65	72	26.4463	82	30.1194	10	3.67309	29.4286	1	7	4	0	1	72	26.4463	0	0	1
68	1	11	25	11	18	1	23	14	-14	7	-17	22	27	1	0	3	2	1	1	1	2	7	2	1.58	41.6	16.664	52.8	21.1505	11.2	4.48646	29.1429	2	4	4	0	1	48	19.2277	6.4	2.56369	0
69	0	7	12	12	17	15	9	5	0	5	-2	-6	34	1	1	2	1	1	1	1	2	6	1	1.63	47.9	18.0285	54.3	20.4374	6.4	2.40882	30.8571	2	0	3	0	0	46	17.3134	-1.9	-0.715119	1
70	0	15	m	20	6	3	4	m	m	-14	-3	1	28	1	1	3	3	1	0	0	2	8	1	1.65	56	20.5693	68	24.977	12	4.40771	29.2857	m	m	m	0	0	m	m	m	m	m
71	0	16	9	17	25	10	5	-7	8	8	-15	-5	32	2	1	3	3	1	1	0	2	7	2	1.6	44	17.1875	55	21.4844	11	4.29688	29	2	6	2	1	1	55	21.4844	11	4.29688	0
72	0	15	25	7	3	2	5	10	-18	-4	-1	3	29	1	1	3	3	1	1	0	2	8	2	1.63	55	20.7008	61	22.9591	6	2.25827	29.5714	1	0	4	0	0	51	19.1953	-4	-1.50551	1
74	1	2	6	20	17	35	23	4	14	-3	18	-12	34	1	0	3	1	1	0	m	m	m	1	1.55	48.5	20.1873	57.5	23.9334	9	3.7461	28.2857	2	0	2	0	1	48.5	20.1873	0	0	1
76	1	21	23	30	27	27	33	2	7	-3	0	6	29	1	1	3	3	1	1	0	3	7	1	1.58	49	19.6283	55	22.0317	6	2.40346	29.1429	2	0	4	1	1	51	20.4294	2	0.801154	0
77	1	5	21	16	8	1	22	16	-5	-8	-7	21	32	1	1	3	3	1	1	0	2	7	2	1.64	m	m	69	25.6544	m	m	28.5714	2	5	4	1	0	68	25.2826	m	m	m
78	0	8	18	11	4	m	11	10	-7	-7	m	m	28	1	1	3	3	1	0	0	2	7	2	1.65	63	23.1405	75	27.5482	12	4.40771	29.8571	2	8	4	0	0	58	21.3039	-5	-1.83655	1
80	0	19	27	7	10	20	17	8	-20	3	10	-3	31	1	1	3	2	1	0	0	2	7	2	1.58	44	17.6254	53	21.2306	9	3.60519	28.7143	2	7	4	1	0	52	20.83	8	3.20461	0
81	1	17	23	10	19	37	34	6	-13	9	18	-3	27	1	1	3	3	1	1	0	2	6	1	1.6	48.9	19.1016	58.5	22.8516	9.6	3.75	29.2857	1	3	4	0	0	57	22.2656	8.1	3.16406	0
82	0	12	25	21	13	9	0	13	-4	-8	-4	-9	28	1	1	3	3	1	1	0	2	5	1	1.68	55	19.487	67	23.7387	12	4.2517	30.5714	2	5	4	0	0	55	19.487	0	0	1
83	1	16	6	9	12	21	17	-10	3	3	9	-4	28	1	1	3	3	1	1	0	1	5	2	1.65	61	22.4059	72	26.4463	11	4.0404	29.7143	2	0	2	1	0	60	22.0386	-1	-0.367309	1
84	0	11	16	9	3	13	16	5	-7	-6	10	3	26	1	1	3	3	1	0	0	2	10	1	1.68	87	30.8248	94	33.305	7	2.48016	31	2	6	4	0	1	82.5	29.2304	-4.5	-1.59439	1
85	0	1	13	22	14	1	7	12	9	-8	-13	6	30	1	1	3	2	1	1	0	2	8	2	1.65	68	24.977	75	27.5482	7	2.57117	30.7143	2	3	3	0	0	60.5	22.2222	-7.5	-2.75482	1
86	0	19	23	16	19	5	6	4	-7	3	-14	1	27	1	1	2	3	1	1	0	2	6	2	1.63	50	18.8189	49.55	18.6496	-0.45	-0.16937	30.8571	1	2	4	1	1	65	24.4646	15	5.64568	0
88	0	3	16	12	4	8	1	13	-4	-8	4	-7	30	1	1	2	2	1	1	0	2	8	1	1.6	60	23.4375	72	28.125	12	4.6875	29.7143	1	5	4	0	1	65	25.3906	5	1.95312	0
89	0	8	21	3	11	4	m	13	-18	8	-7	m	36	1	1	3	2	1	1	1	2	8	2	1.58	47	18.8271	55	22.0317	8	3.20461	28.5714	1	3	4	m	m	m	m	m	m	m
90	0	8	16	4	5	m	13	8	-12	1	m	m	29	1	1	2	2	1	1	0	3	9	1	1.62	43	16.3847	51	19.433	8	3.04832	29.5714	2	2	4	0	1	47.5	18.0994	4.5	1.71468	0
91	1	4	m	7	15	8	23	m	m	8	-7	15	25	1	1	3	2	1	1	1	2	8	1	1.6	55	21.4844	60	23.4375	5	1.95312	29.4286	m	m	m	1	0	52	20.3125	-3	-1.17188	1
92	0	24	16	7	5	7	9	-8	-9	-2	2	2	28	1	1	3	3	1	1	0	3	5	2	1.58	61	24.4352	65.5	26.2378	4.5	1.8026	30.7143	2	0	4	0	0	59.3	23.7542	-1.7	-0.680981	1
93	0	5	13	14	16	3	m	8	1	2	-13	m	28	1	1	2	2	1	1	0	3	8	2	1.55	38	15.8169	49	20.3954	11	4.57856	29.2857	1	1	3	m	m	m	m	m	m	m
96	0	14	6	7	4	6	5	-8	1	-3	2	-1	26	1	1	3	2	1	0	0	3	8	2	1.56	45	18.4911	51.5	21.1621	6.5	2.67094	28.1429	2	2	2	0	1	45	18.4911	0	0	1
97	0	8	4	9	33	12	8	-4	5	24	-21	-4	29	1	1	3	3	1	1	0	2	8	1	1.64	50	18.5901	61	22.68	11	4.08983	28.4286	2	0	1	0	0	55	20.4491	5	1.85901	0
98	0	20	33	12	29	16	15	13	-21	17	-13	-1	40	1	1	3	2	1	1	0	3	8	2	1.52	43	18.6115	55.6	24.0651	12.6	5.4536	29.7143	2	6	4	1	1	51	22.0741	8	3.4626	0
99	0	7	18	6	4	1	1	11	-12	-2	-3	0	29	1	1	3	2	1	1	0	2	6	1	1.71	74	25.3069	80	27.3588	6	2.05191	28	1	2	4	1	1	75	25.6489	1	0.341986	0
101	0	11	16	8	15	5	m	5	-8	7	-10	m	29	1	1	3	2	2	1	1	2	7	2	1.57	49	19.8791	59	23.9361	10	4.05696	30.1429	2	8	4	m	m	m	m	m	m	m
102	0	11	m	21	5	6	m	m	m	-16	1	m	36	1	1	2	2	1	0	0	2	8	2	1.6	60	23.4375	72	28.125	12	4.6875	29	m	m	m	m	m	m	m	m	m	m
104	0	9	15	2	8	2	m	6	-13	6	-6	m	30	1	0	3	2	1	1	0	2	8	2	1.57	48	19.4734	59	23.9361	11	4.46266	29	2	2	3	m	m	m	m	m	m	m
105	0	5	21	4	4	10	m	16	-17	0	6	m	26	1	0	3	2	1	1	0	2	8	1	1.65	55	20.202	60.5	22.2222	5.5	2.0202	30.4286	2	4	4	m	m	m	m	m	m	m
106	0	9	13	13	11	2	m	4	0	-2	-9	m	25	1	0	2	2	1	0	0	2	8	1	1.68	62.7	22.2151	75.3	26.6794	12.6	4.46429	29.4286	2	3	3	m	m	m	m	m	m	m
108	1	11	3	6	m	m	27	-8	3	m	m	m	27	1	0	3	2	1	0	0	2	8	2	1.6	48	18.75	58	22.6562	10	3.90625	29.8571	2	0	1	0	0	55	21.4844	7	2.73438	0
109	1	13	33	22	8	m	m	20	-11	-14	m	m	29	1	0	1	2	1	0	0	3	7	1	1.57	42.6	17.2826	49	19.8791	6.4	2.59645	29.1429	2	0	4	m	m	m	m	m	m	m
110	1	9	22	35	15	20	m	13	13	-20	5	m	31	1	1	3	3	1	1	0	3	7	2	1.58	50	20.0288	59	23.634	9	3.60519	28.7143	2	5	4	m	m	m	m	m	m	m
111	0	6	24	14	8	1	m	18	-10	-6	-7	m	35	1	1	3	3	1	1	0	2	7	1	1.6	57	22.2656	66	25.7812	9	3.51562	29.5714	2	2	4	m	m	m	m	m	m	m
112	0	11	25	25	7	1	m	14	0	-18	-6	m	25	1	1	2	2	1	0	0	2	7	2	1.6	46	17.9688	56	21.875	10	3.90625	29	2	5	4	m	m	m	m	m	m	m
113	0	12	8	3	7	13	m	-4	-5	4	6	m	32	1	1	3	1	1	1	0	1	3	1	1.6	62	24.2188	71	27.7344	9	3.51562	29.1429	2	4	2	m	m	m	m	m	m	m
117	0	8	10	7	m	2	m	2	-3	m	m	m	31	1	1	3	3	1	1	0	1	5	1	1.68	61	21.6128	75	26.5731	14	4.96032	29.2857	2	0	3	m	m	m	m	m	m	m
120	0	6	m	25	7	3	m	m	m	-18	-4	m	33	1	1	3	2	1	1	0	2	7	2	1.65	57	20.9366	64	23.5078	7	2.57117	30	m	m	m	m	m	m	m	m	m	m
121	0	16	5	15	23	6	15	-11	10	8	-17	9	35	2	1	3	3	1	1	1	2	9	2	1.72	75	25.3515	89	30.0838	14	4.73229	28.4286	2	3	2	0	0	80	27.0416	5	1.6901	0
122	1	8	18	19	4	29	m	10	1	-15	25	m	30	1	1	3	2	1	1	0	2	7	2	1.6	55	21.4844	62	24.2188	7	2.73438	30	1	8	4	m	m	m	m	m	m	m
123	0	12	20	13	14	m	m	8	-7	1	m	m	26	1	1	3	2	1	0	0	3	8	1	1.6	49	19.1406	54	21.0938	5	1.95312	30	2	1	4	m	m	m	m	m	m	m
126	0	11	6	19	6	4	m	-5	13	-13	-2	m	28	1	1	3	2	1	1	0	3	8	2	1.7	56	19.3772	65	22.4913	9	3.11419	29.1429	2	0	2	m	m	m	m	m	m	m
127	0	8	5	24	19	m	m	-3	19	-5	m	m	31	1	1	3	2	1	1	0	2	7	2	1.64	68	25.2826	74	27.5134	6	2.23081	29.4286	1	0	2	m	m	m	m	m	m	m
128	0	6	29	8	5	2	m	23	-21	-3	-3	m	29	1	1	3	2	2	0	0	2	7	2	1.58	54	21.6311	64	25.6369	10	4.00577	29.4286	2	6	4	m	m	m	m	m	m	m
133	0	13	m	13	6	4	m	m	m	-7	-2	m	29	1	1	2	2	1	1	1	2	7	2	1.66	54	19.5965	64	23.2254	10	3.62897	29.2857	m	m	m	m	m	m	m	m	m	m
134	0	24	13	16	8	m	m	-11	3	-8	m	m	33	1	1	3	3	1	1	1	1	5	2	1.65	54	19.8347	62	22.7732	8	2.93848	28.8571	m	0	3	m	m	m	m	m	m	m
135	0	6	17	7	9	5	m	11	-10	2	-4	m	33	1	1	3	3	1	1	0	2	8	2	1.7	66.5	23.0104	76.7	26.5398	10.2	3.52941	29.8571	2	2	4	m	m	m	m	m	m	m
136	0	9	3	1	2	0	5	-6	-2	1	-2	5	33	1	m	3	3	1	0	0	2	7	2	1.68	55	19.487	69	24.4473	14	4.96032	30.5714	2	2	1	0	1	62	21.9671	7	2.48016	0
139	0	8	15	10	14	9	10	7	-5	4	-5	1	33	2	0	2	2	1	1	0	1	6	2	1.63	58	21.83	70	26.3465	12	4.51654	29.2857	1	7	3	1	1	52	19.5717	-6	-2.25827	1
140	0	10	25	25	4	6	m	15	0	-21	2	m	27	1	1	2	2	1	0	0	1	7	1	1.57	48	19.4734	57	23.1247	9	3.65126	29.5714	2	10	4	m	m	m	m	m	m	m
141	0	8	14	14	m	m	15	6	0	m	m	m	29	1	1	3	3	1	1	1	3	9	2	1.63	59	22.2063	65	24.4646	6	2.25827	30.1429	2	0	3	1	1	59	22.2063	0	0	1
143	0	7	15	17	24	18	4	8	2	7	-6	-14	29	1	1	3	2	1	1	1	3	9	2	1.62	49.5	18.8615	57.5	21.9098	8	3.04832	29.7143	2	4	3	0	0	49	18.6709	-0.5	-0.19052	1
144	0	3	m	10	1	25	m	m	m	-9	24	m	30	1	1	1	2	1	1	0	2	10	1	1.63	48	18.0662	60	22.5827	12	4.51654	29.2857	m	m	m	m	m	m	m	m	m	m
146	0	10	m	m	3	4	m	m	m	m	1	m	28	1	0	3	1	1	1	1	2	8	m	1.62	46	17.5278	55.3	21.0715	9.3	3.54367	29.1429	m	m	m	m	m	m	m	m	m	m
147	1	10	25	23	35	17	m	15	-2	12	-18	m	30	1	0	2	2	1	1	0	3	7	1	1.69	53	18.5568	67	23.4586	14	4.90179	29.2857	2	6	4	m	m	m	m	m	m	m
149	0	10	8	21	6	1	m	-2	13	-15	-5	m	28	1	1	3	3	2	1	1	2	7	2	1.6	44	17.1875	55	21.4844	11	4.29688	29	2	3	2	m	m	m	m	m	m	m
150	0	10	23	8	8	m	m	13	-15	0	m	m	31	1	1	3	2	1	1	1	2	7	1	1.68	60	21.2585	78.2	27.7069	18.2	6.44841	29.5714	2	3	4	m	m	m	m	m	m	m
151	0	7	18	6	4	1	1	11	-12	-2	-3	0	29	1	1	3	2	1	1	0	2	6	1	1.71	74	25.3069	80	27.3588	6	2.05191	28	1	2	4	1	1	75	25.6489	1	0.341986	0
152	0	5	m	2	2	6	m	m	m	0	4	m	31	1	1	3	3	1	1	1	2	8	2	1.6	48	18.75	50.5	19.7266	2.5	0.976562	29.7143	m	m	m	m	m	m	m	m	m	m
155	0	20	11	13	24	7	m	-9	2	11	-17	m	21	1	0	2	2	1	0	0	2	8	2	1.65	48	17.6309	57.5	21.1203	9.5	3.48944	30	2	2	3	m	m	m	m	m	m	m
156	0	14	11	23	6	m	m	-3	12	-17	m	m	31	1	1	2	2	1	1	0	1	5	1	1.55	47.6	19.8127	54	22.4766	6.4	2.66389	29.1429	2	2	3	m	m	m	m	m	m	m
158	0	m	23	24	4	19	m	m	1	-20	15	m	33	1	0	1	1	1	1	0	2	6	2	1.6	52.5	20.5078	65	25.3906	12.5	4.88281	29.2857	2	6	4	m	m	m	m	m	m	m
159	0	8	m	21	15	7	m	m	m	-6	-8	m	34	1	1	3	3	1	1	0	2	7	2	1.62	55	20.9572	66.7	25.4153	11.7	4.45816	30.4286	m	m	m	m	m	m	m	m	m	m
160	0	17	11	13	4	18	m	-6	2	-9	14	m	30	1	1	3	2	1	1	0	2	7	2	1.68	51.8	18.3532	60.5	21.4357	8.7	3.08248	30	2	3	3	m	m	m	m	m	m	m
161	1	0	1	18	m	m	21	1	17	m	m	m	32	2	1	3	3	1	1	0	2	6	2	1.6	50	19.5312	60.44	23.6094	10.44	4.07812	29.5714	m	0	1	0	1	54	21.0938	4	1.5625	0
163	0	11	15	13	11	m	m	4	-2	-2	m	m	25	1	1	3	1	1	1	0	2	9	2	1.64	46	17.1029	60	22.3081	14	5.20523	29.4286	2	4	3	m	m	m	m	m	m	m
164	1	9	22	35	15	20	m	13	13	-20	5	m	31	1	1	3	3	1	1	0	3	7	2	1.58	50	20.0288	59	23.634	9	3.60519	28.7143	2	5	4	m	m	m	m	m	m	m
168	0	5	14	2	4	13	m	9	-12	2	9	m	32	1	0	3	1	1	0	0	2	8	2	1.58	51	20.4294	62	24.8358	11	4.40635	29.4286	2	5	3	m	m	m	m	m	m	m
169	0	26	m	14	15	m	m	m	m	1	m	m	26	1	1	3	3	1	0	0	2	7	1	1.67	50.3	18.0358	61	21.8724	10.7	3.83664	29.5714	m	m	m	m	m	m	m	m	m	m
170	0	17	m	5	7	m	4	m	m	2	m	m	30	2	1	3	2	2	0	0	2	8	1	1.63	60	22.5827	69	25.9701	9	3.38741	29	2	1	m	0	1	64	24.0882	4	1.50551	0
172	1	6	22	15	15	23	m	16	-7	0	8	m	30	1	1	3	m	1	0	0	3	10	2	1.67	49	17.5697	52.5	18.8246	3.5	1.25498	29	1	0	4	m	m	m	m	m	m	m
173	0	8	5	8	12	m	11	-3	3	4	m	m	31	2	1	3	2	1	1	0	2	7	2	1.6	55	21.4844	61	23.8281	6	2.34375	29.4286	2	1	2	1	1	55	21.4844	0	0	1
174	0	6	0	1	15	7	m	-6	1	14	-8	m	28	1	1	3	2	1	1	0	2	10	2	1.62	58.5	22.2908	66.5	25.3391	8	3.04832	29.7143	2	0	1	m	m	m	m	m	m	m
176	1	m	21	21	3	25	m	m	0	-18	22	m	30	1	1	3	2	1	0	0	2	8	1	1.62	50	19.052	62	23.6244	12	4.57247	29.4286	2	5	4	m	m	m	m	m	m	m
177	0	5	9	m	22	m	m	4	m	m	m	m	31	1	1	3	2	1	1	0	2	8	m	1.59	50.75	20.0744	61	24.1288	10.25	4.05443	29	2	0	2	m	m	m	m	m	m	m
178	0	7	0	5	m	m	1	-7	5	m	m	m	29	1	0	2	3	1	1	0	3	8	2	1.66	60	21.7738	66	23.9512	6	2.17738	27.4286	1	0	1	0	0	58	21.048	-2	-0.725795	1
179	0	13	m	12	20	m	1	m	m	8	m	m	30	1	1	3	2	1	0	0	1	5	2	1.68	68	24.093	76	26.9274	8	2.83447	29	m	m	m	0	1	71	25.1559	3	1.06293	0
180	0	1	8	10	2	m	2	7	2	-8	m	m	23	1	0	3	2	1	1	1	2	10	1	1.68	54	19.1327	63	22.3214	9	3.18878	29.8571	1	0	2	1	0	54	19.1327	0	0	1
181	0	3	5	m	4	1	m	2	m	m	-3	m	32	1	1	3	2	1	1	1	2	10	1	1.66	67	24.3141	76.5	27.7616	9.5	3.44753	28	2	1	2	m	m	m	m	m	m	m
182	0	10	28	28	6	19	2	18	0	-22	13	-17	32	1	1	2	1	1	1	0	2	8	2	1.6	50	19.5312	59	23.0469	9	3.51562	29.4286	2	6	4	0	1	51	19.9219	1	0.390625	0
184	0	8	6	10	27	8	2	-2	4	17	-19	-6	28	1	1	3	2	1	0	0	2	8	2	1.65	58	21.3039	71	26.079	13	4.77502	28.1429	1	0	2	0	0	56	20.5693	-2	-0.734619	1
185	0	18	27	m	11	10	m	9	m	m	-1	m	m	1	1	3	3	1	1	0	3	8	m	1.7	56	19.3772	64	22.1453	8	2.76817	29.1429	2	6	4	m	m	m	m	m	m	m
188	0	10	8	3	20	9	0	-2	-5	17	-11	-9	27	1	0	1	2	1	0	0	2	7	2	1.63	66.5	25.0292	76	28.6048	9.5	3.5756	29.7143	2	5	2	1	1	78	29.3575	11.5	4.32835	0
190	0	10	22	30	9	33	9	12	8	-21	24	-24	26	1	0	2	2	1	1	0	2	5	1	1.72	49	16.563	58	19.6052	9	3.04218	29.7143	2	1	4	0	1	49	16.563	0	0	1
191	0	23	21	22	9	22	5	-2	1	-13	13	-17	29	1	1	2	2	1	0	0	2	7	1	1.5	42	18.6667	49	21.7778	7	3.11111	29.1429	2	6	4	0	1	42	18.6667	0	0	1
192	0	22	7	19	21	6	4	-15	12	2	-15	-2	33	1	1	3	3	1	1	0	2	7	1	1.64	65.9	24.5018	72.5	26.9557	6.6	2.4539	29.2857	2	1	2	0	1	70	26.0262	4.1	1.52439	0
193	0	21	20	25	12	m	m	-1	5	-13	m	m	27	1	1	2	2	1	0	0	1	6	1	1.65	48	17.6309	59	21.6713	11	4.0404	28.7143	1	2	4	m	m	m	m	m	m	m
194	0	9	16	14	16	8	m	7	-2	2	-8	m	28	1	1	3	2	1	1	0	3	8	2	1.58	58	23.2335	65	26.0375	7	2.80404	28.8571	2	2	4	m	m	m	m	m	m	m
195	0	12	m	m	10	4	m	m	m	m	-6	m	27	1	1	3	2	1	0	0	2	6	m	1.6	47	18.3594	60	23.4375	13	5.07812	30.5714	m	m	m	m	m	m	m	m	m	m
197	0	6	15	m	26	17	4	9	m	m	-9	-13	32	1	0	3	2	1	1	1	2	5	m	1.65	49	17.9982	59	21.6713	10	3.67309	29.7143	2	5	3	1	0	50	18.3655	1	0.367309	0
200	0	7	9	6	21	m	5	2	-3	15	m	m	29	1	0	3	2	1	1	1	2	8	2	1.65	44.6	16.382	53	19.4674	8.4	3.0854	29.1429	2	0	2	0	0	45	16.5289	0.4	0.146924	0
201	0	7	12	8	m	m	4	5	-4	m	m	m	23	1	1	3	2	1	1	0	2	7	1	1.63	51	19.1953	58	21.83	7	2.63465	29.4286	2	m	3	0	1	48	18.0662	-3	-1.12914	1
202	0	11	15	3	10	1	0	4	-12	7	-9	-1	29	2	1	1	2	1	1	0	1	7	2	1.6	55	21.4844	66	25.7812	11	4.29688	29.5714	2	5	3	1	1	60	23.4375	5	1.95312	0
203	0	9	m	16	12	4	6	m	m	-4	-8	2	31	1	1	3	2	1	1	1	3	8	1	1.65	61	22.4059	70	25.7117	9	3.30579	28	m	m	m	0	0	57	20.9366	-4	-1.46924	1
204	1	12	32	16	15	26	25	20	-16	-1	11	-1	27	1	1	3	2	1	1	0	2	6	1	1.67	48	17.2111	56	20.0796	8	2.86851	29	1	0	4	1	1	54	19.3625	6	2.15139	0
205	0	9	29	8	3	7	2	20	-21	-5	4	-5	30	1	1	3	3	1	0	0	1	6	1	1.66	58	21.048	70	25.4028	12	4.35477	29.7143	2	6	4	0	1	60	21.7738	2	0.725795	0
206	0	6	12	13	16	6	m	6	1	3	-10	m	34	1	m	3	1	1	1	0	2	7	2	1.63	60	22.5827	70	26.3465	10	3.76378	29.4286	2	0	3	m	m	m	m	m	m	m
207	0	9	12	6	m	m	4	3	-6	m	m	m	28	1	1	3	2	1	1	0	2	6	2	1.58	45	18.026	55	22.0317	10	4.00577	28.1429	2	0	3	0	1	45	18.026	0	0	1
208	0	27	m	m	11	14	8	m	m	m	3	-6	28	1	1	2	1	1	0	0	2	7	2	1.65	48	17.6309	57	20.9366	9	3.30579	28.1429	m	m	m	1	0	60	22.0386	12	4.40771	0
209	0	8	6	6	21	7	4	-2	0	15	-14	-3	30	1	1	m	2	1	1	0	2	7	2	1.6	65	25.3906	72	28.125	7	2.73438	28.8571	1	0	2	0	0	65	25.3906	0	0	1
210	0	21	15	15	17	m	8	-6	0	2	m	m	28	1	0	3	2	1	1	1	2	7	1	1.63	54	20.3244	63	23.7118	9	3.38741	29.4286	2	8	3	1	0	54.5	20.5126	0.5	0.188189	0
211	0	8	21	9	12	6	4	13	-12	3	-6	-2	34	1	1	2	1	1	1	1	2	8	1	1.62	60	22.8624	65	24.7676	5	1.9052	29.8571	2	6	4	0	1	57	21.7193	-3	-1.14312	1
213	0	8	27	12	12	6	6	19	-15	0	-6	0	31	1	0	3	3	1	1	0	2	6	2	1.64	66	24.539	77	28.6288	11	4.08983	29.7143	2	6	4	1	0	m	m	m	m	m
214	0	3	20	2	2	m	m	17	-18	0	m	m	38	1	0	2	3	1	1	0	2	7	2	1.58	58	23.2335	67	26.8386	9	3.60519	29.4286	2	4	4	m	m	m	m	m	m	m
215	0	14	21	12	24	m	9	7	-9	12	m	m	26	1	1	1	1	1	1	1	2	8	1	1.57	43.5	17.6478	51	20.6905	7.5	3.04272	28	2	4	4	0	1	45	18.2563	1.5	0.608544	0
216	0	6	11	15	m	m	1	5	4	m	m	m	28	1	1	2	2	1	1	0	2	7	1	1.6	59.1	23.0859	73	28.5156	13.9	5.42969	28.2857	1	5	3	0	1	65	25.3906	5.9	2.30469	0
217	0	18	9	30	m	m	7	-9	21	m	m	m	31	1	1	3	3	1	1	0	2	8	1	1.6	50	19.5312	58.6	22.8906	8.6	3.35938	28.4286	2	0	2	0	1	54	21.0938	4	1.5625	0
220	0	9	3	15	m	m	1	-6	12	m	m	m	35	1	1	3	3	1	1	0	2	8	1	1.6	54	21.0938	63	24.6094	9	3.51562	28.5714	2	3	1	0	1	55	21.4844	1	0.390625	0
221	0	19	8	33	17	m	9	-11	25	-16	m	m	30	2	1	3	3	1	1	0	3	9	1	1.57	54	21.9076	64	25.9645	10	4.05696	29.1429	2	1	2	0	1	42.5	17.2421	-11.5	-4.6655	1
222	0	14	14	19	11	3	1	0	5	-8	-8	-2	26	1	0	2	2	1	1	1	2	7	2	1.73	54	18.0427	65	21.7181	11	3.67537	30.7143	2	2	3	0	0	55	18.3768	1	0.334124	0
223	0	2	3	5	4	m	11	1	2	-1	m	m	35	1	1	3	2	1	1	0	1	7	1	1.62	86.8	33.0742	90	34.2936	3.2	1.21933	28.2857	1	0	1	0	1	85	32.3884	-1.8	-0.685871	1
224	0	5	22	3	3	18	3	17	-19	0	15	-15	30	1	1	3	2	1	1	1	2	8	2	1.6	64	25	74	28.9062	10	3.90625	28	2	4	4	0	0	67	26.1719	3	1.17188	0
227	0	15	10	6	7	5	m	-5	-4	1	-2	m	29	1	0	3	2	1	1	0	2	9	1	1.7	70.4	24.3599	71	24.5675	0.6	0.207612	29.5714	2	5	3	m	m	m	m	m	m	m
228	0	15	0	0	5	m	5	-15	0	5	m	m	27	1	1	3	3	1	1	0	1	7	2	1.7	57	19.7232	65	22.4913	8	2.76817	29.1429	2	9	1	0	0	58	20.0692	1	0.346021	0
232	0	6	1	2	15	6	2	-5	1	13	-9	-4	28	1	1	3	2	1	1	0	2	7	1	1.68	46	16.2982	55	19.487	9	3.18878	28.4286	2	0	1	0	1	52	18.424	6	2.12585	0
233	0	12	3	6	8	3	9	-9	3	2	-5	6	28	2	0	3	2	1	0	0	3	6	1	1.62	63	24.0055	67.9	25.8726	4.9	1.86709	29	2	2	1	0	0	56.5	21.5287	-6.5	-2.47676	1
235	0	19	25	m	12	6	m	6	m	m	-6	m	32	1	1	3	2	1	1	1	2	7	m	1.66	m	m	67.7	24.5682	m	m	29	2	5	4	m	m	m	m	m	m	m
236	0	11	5	5	16	5	8	-6	0	11	-11	3	29	1	1	3	3	2	1	0	2	7	2	1.67	58	20.7967	67	24.0238	9	3.22708	28	2	0	2	0	0	68	24.3824	10	3.58564	0
238	0	8	9	9	11	m	4	1	0	2	m	m	31	1	1	2	2	1	1	0	2	7	2	1.51	47.4	20.7886	56	24.5603	8.6	3.77176	29.8571	2	9	2	1	1	52	22.806	4.6	2.01746	0
239	0	3	1	2	m	m	3	-2	1	m	m	m	36	1	1	3	2	1	0	0	3	8	2	1.6	54.5	21.2891	67	26.1719	12.5	4.88281	28.4286	2	0	1	0	1	78	30.4688	23.5	9.17969	0
240	0	11	9	13	m	m	3	-2	4	m	m	m	33	1	1	3	2	1	1	0	2	9	2	1.6	50	19.5312	55	21.4844	5	1.95312	28.1429	2	0	2	0	0	50	19.5312	0	0	1
242	0	9	m	11	9	22	4	m	m	-2	13	-18	31	1	1	3	1	1	1	0	2	6	2	1.6	52.5	20.5078	60	23.4375	7.5	2.92969	29.4286	m	m	m	0	1	52.5	20.5078	0	0	1
243	0	8	16	13	6	m	7	8	-3	-7	m	m	33	1	0	3	2	1	1	1	2	8	2	1.58	49.35	19.7685	55.7	22.3121	6.35	2.54366	29.7143	1	3	4	0	0	47	18.8271	-2.35	-0.941356	1
244	0	9	6	5	6	m	3	-3	-1	1	m	m	32	1	1	3	3	1	1	0	3	10	2	1.67	57	20.4382	67	24.0238	10	3.58564	29.1429	1	0	2	0	1	59	21.1553	2	0.717129	0
245	0	7	9	1	18	11	7	2	-8	17	-7	-4	29	1	1	3	2	2	1	0	2	8	1	1.6	58.5	22.8516	67	26.1719	8.5	3.32031	29	2	2	2	0	1	64	25	5.5	2.14844	0
246	0	5	m	33	9	2	2	m	m	-24	-7	0	35	1	1	3	3	1	1	0	2	8	1	1.52	49.9	21.598	56.5	24.4546	6.6	2.85665	28.8571	m	m	m	0	1	49	21.2084	-0.9	-0.389543	1
247	0	12	6	8	18	10	10	-6	2	10	-8	0	33	1	1	2	2	1	0	1	2	8	1	1.62	49	18.6709	57	21.7193	8	3.04832	29.5714	2	0	2	0	1	49	18.6709	0	0	1
248	0	8	m	15	m	m	2	m	m	m	m	m	27	1	1	2	2	1	1	0	2	8	1	1.58	48	19.2277	56.5	22.6326	8.5	3.4049	28.7143	m	m	m	0	1	48	19.2277	0	0	1
249	0	13	12	13	12	6	2	-1	1	-1	-6	-4	32	1	1	2	2	1	1	1	2	6	2	1.6	54	21.0938	64	25	10	3.90625	29.8571	2	2	3	0	1	60	23.4375	6	2.34375	0
250	0	10	4	12	23	m	10	-6	8	11	m	m	29	1	0	3	2	1	1	0	2	7	2	1.6	53	20.7031	66	25.7812	13	5.07812	30.7143	2	0	1	1	0	56	21.875	3	1.17188	0
251	0	6	31	6	m	m	9	25	-25	m	m	m	27	1	1	3	2	1	0	0	2	7	1	1.53	52	22.2137	62	26.4855	10	4.27186	28.7143	1	6	4	0	1	58	24.7768	6	2.56312	0
252	0	7	9	4	m	m	1	2	-5	m	m	m	18	1	0	3	3	1	1	1	2	8	2	1.63	55.5	20.889	69	25.9701	13.5	5.08111	27.7143	2	0	2	0	0	61	22.9591	5.5	2.07008	0
254	0	10	1	10	19	8	9	-9	9	9	-11	1	29	1	1	1	1	1	1	0	2	8	1	1.66	63	22.8625	80	29.0318	17	6.16926	29.4286	1	0	1	1	1	65	23.5883	2	0.725795	0
255	0	10	17	16	19	14	7	7	-1	3	-5	-7	35	1	1	3	3	1	1	0	2	8	2	1.74	68	22.46	80	26.4236	12	3.96354	28.7143	2	4	4	0	0	67	22.1297	-1	-0.330295	1
256	0	m	8	3	m	m	1	m	-5	m	m	m	29	1	1	3	2	1	1	0	3	9	1	1.56	57	23.4221	67	27.5312	10	4.10914	28.2857	2	3	2	0	0	60	24.6548	3	1.23274	0
257	0	7	19	m	27	m	m	12	m	m	m	m	31	1	1	3	2	1	0	0	2	8	m	1.68	63	22.3214	70.3	24.9079	7.3	2.58645	29.7143	1	3	4	m	m	m	m	m	m	m
258	0	6	9	6	m	m	8	3	-3	m	m	m	32	1	1	2	2	1	1	0	2	8	1	1.56	68	27.9421	72	29.5858	4	1.64366	29.1429	2	1	2	0	1	63	25.8876	-5	-2.05457	1
259	1	3	2	24	18	4	18	-1	22	-6	-14	14	36	1	1	3	2	1	1	0	2	8	2	1.61	56	21.6041	70	27.0051	14	5.40103	29.5714	2	0	1	0	0	60	23.1473	4	1.54315	0
260	0	12	6	11	4	m	7	-6	5	-7	m	m	33	1	1	3	3	1	1	1	2	8	2	1.56	50	20.5457	60	24.6548	10	4.10914	29.2857	2	4	2	1	1	54	22.1893	4	1.64366	0
261	0	16	m	6	m	m	9	m	m	m	m	m	29	1	1	3	2	1	1	0	2	8	1	1.65	56	20.5693	64	23.5078	8	2.93848	29.7143	m	m	m	0	0	62.5	22.9568	6.5	2.38751	0
262	0	13	9	13	8	6	4	-4	4	-5	-2	-2	37	2	0	2	3	1	0	1	1	6	2	1.55	62	25.8065	65.2	27.1384	3.2	1.33195	29	2	3	2	0	0	57	23.7253	-5	-2.08117	1
263	0	8	16	11	5	14	m	8	-5	-6	9	m	30	1	1	3	2	1	1	1	2	7	1	1.6	57	22.2656	65.3	25.5078	8.3	3.24219	29.5714	2	3	4	m	m	m	m	m	m	m
264	1	22	m	13	m	m	32	m	m	m	m	m	24	1	0	2	3	1	0	0	1	6	2	1.55	42.5	17.6899	53	22.0604	10.5	4.37045	29.8571	m	m	m	1	1	41.5	17.2737	-1	-0.416233	1
267	0	13	m	13	6	4	m	m	m	-7	-2	m	35	1	1	3	2	1	1	1	2	7	2	1.7	59	20.4152	62.3	21.5571	3.3	1.14187	28.7143	m	m	m	m	m	m	m	m	m	m
269	0	13	m	13	m	m	9	m	m	m	m	m	29	1	0	3	3	1	1	1	2	9	m	1.6	51	19.9219	54	21.0938	3	1.17188	28.4286	m	m	m	0	1	51	19.9219	0	0	1
270	0	10	6	5	26	25	12	-4	-1	21	-1	-13	34	2	1	2	2	1	0	1	2	7	m	1.65	60	22.0386	66.5	24.4261	6.5	2.38751	29.1429	1	2	2	0	1	60	22.0386	0	0	1
272	0	25	19	16	10	18	14	-6	-3	-6	8	-4	31	1	1	3	3	1	1	0	1	6	1	1.5	45	20	52.05	23.1333	7.05	3.13333	28.4286	2	0	4	1	0	42	18.6667	-3	-1.33333	1
273	0	7	12	5	m	m	0	5	-7	m	m	m	28	1	1	3	3	1	1	0	2	8	2	1.67	56	20.0796	66	23.6652	10	3.58564	28.4286	1	0	3	0	1	59.5	21.3346	3.5	1.25498	0
275	0	7	4	4	7	10	m	-3	0	3	3	m	30	1	0	2	2	1	0	0	2	9	1	1.57	57	23.1247	66.5	26.9788	9.5	3.85411	29.5714	2	0	1	m	m	m	m	m	m	m
276	0	1	2	1	m	m	4	1	-1	m	m	m	32	1	0	1	1	2	1	0	2	9	2	1.62	51.75	19.7188	59.55	22.6909	7.8	2.97211	29.5714	2	0	1	0	0	56	21.3382	4.25	1.61942	0
278	1	6	5	25	m	m	24	-1	20	m	m	m	26	1	1	1	1	1	0	0	2	8	1	1.63	54.5	20.5126	69	25.9701	14.5	5.45749	29.4286	2	3	2	0	0	54	20.3244	-0.5	-0.188189	1
279	1	31	m	22	m	m	21	m	m	m	m	m	28	1	0	2	2	1	1	0	2	6	2	1.69	55	19.257	64	22.4082	9	3.15115	29.1429	m	m	m	0	0	56	19.6072	1	0.350128	0
281	0	11	4	6	4	14	7	-7	2	-2	10	-7	31	1	1	3	2	1	1	1	2	7	1	1.68	48.5	17.184	57	20.1956	8.5	3.01162	29.4286	2	2	1	0	1	53.5	18.9555	5	1.77154	0
283	0	8	4	9	33	12	8	-4	5	24	-21	-4	29	1	1	3	3	1	1	0	2	8	1	1.64	50	18.5901	61	22.68	11	4.08983	28.4286	2	0	1	0	0	55	20.4491	5	1.85901	0
284	0	13	5	m	9	4	3	-8	m	m	-5	-1	26	1	1	3	3	1	1	0	3	9	2	1.62	60	22.8624	66	25.1486	6	2.28624	28.7143	2	0	2	0	0	59	22.4813	-1	-0.381039	1
285	1	11	3	6	m	m	27	-8	3	m	m	m	27	1	0	3	2	1	0	0	2	8	2	1.6	48	18.75	58	22.6562	10	3.90625	29.8571	2	0	1	0	0	55	21.4844	7	2.73438	0
286	0	10	22	30	9	33	9	12	8	-21	24	-24	26	1	0	2	2	1	1	0	2	5	1	1.72	49	16.563	58	19.6052	9	3.04218	29.7143	2	1	4	0	1	49	16.563	0	0	1
287	0	10	8	15	m	m	8	-2	7	m	m	m	29	1	1	3	3	1	0	0	2	7	2	1.64	48	17.8465	58	21.5645	10	3.71802	29.5714	2	2	2	0	0	50.5	18.776	2.5	0.929506	0
288	0	10	6	5	26	25	12	-4	-1	21	-1	-13	34	2	1	2	2	1	0	1	2	7	m	1.65	60	22.0386	66.5	24.4261	6.5	2.38751	29.1429	1	2	2	0	1	60	22.0386	0	0	1
290	0	2	3	5	4	m	11	1	2	-1	m	m	35	1	1	3	2	1	1	0	1	7	1	1.6	86.8	33.9062	90	35.1562	3.2	1.25	28.2857	1	0	1	0	1	85	33.2031	-1.8	-0.703125	1
291	1	18	24	9	25	14	22	6	-15	16	-11	8	25	1	0	3	2	1	1	0	3	6	2	1.6	56.95	22.2461	68.45	26.7383	11.5	4.49219	30.7143	1	0	4	0	0	65	25.3906	8.05	3.14453	0
293	0	13	13	27	m	m	15	0	14	m	m	m	29	1	0	3	2	1	1	0	2	7	2	1.62	57.5	21.9098	70	26.6728	12.5	4.76299	28.7143	2	6	3	1	0	63	24.0055	5.5	2.09572	0
294	0	3	8	39	m	m	9	5	31	m	m	m	35	1	1	3	3	1	1	0	2	9	1	1.65	56	20.5693	70	25.7117	14	5.14233	29.1429	2	0	2	0	0	55	20.202	-1	-0.367309	1
295	0	14	13	29	15	12	m	-1	16	-14	-3	m	35	1	1	3	2	1	1	0	2	6	1	1.62	49.65	18.9186	56.9	21.6811	7.25	2.76254	29	1	0	3	m	m	m	m	m	m	m
297	0	20	3	12	27	m	m	-17	9	15	m	m	35	1	0	3	2	1	1	0	2	7	2	1.58	45	18.026	64.5	25.8372	19.5	7.81125	28.5714	2	0	1	m	m	m	m	m	m	m
298	0	6	m	13	0	0	m	m	m	-13	0	m	26	1	0	2	2	1	1	0	3	8	2	1.66	48	17.4191	54	19.5965	6	2.17738	30.1429	m	m	m	m	m	m	m	m	m	m
299	0	5	10	12	m	m	6	5	2	m	m	m	30	1	0	1	2	1	1	0	3	8	1	1.5	44	19.5556	56	24.8889	12	5.33333	29.5714	2	2	3	0	1	48	21.3333	4	1.77778	0
300	0	14	4	6	31	8	16	-10	2	25	-23	8	35	1	1	3	2	1	1	1	2	5	1	1.63	m	m	63	23.7118	m	m	28.5714	2	6	1	0	1	62	23.3355	m	m	m
301	0	8	m	7	m	m	4	m	m	m	m	m	25	1	1	2	1	1	0	0	2	8	1	1.58	43	17.2248	54	21.6311	11	4.40635	29	m	m	m	0	0	45	18.026	2	0.801154	0
302	1	15	m	16	m	m	20	m	m	m	m	m	37	2	0	1	2	1	0	0	1	6	1	1.58	44.5	17.8257	54	21.6311	9.5	3.80548	29.1429	m	m	m	1	0	49	19.6283	4.5	1.8026	0
303	0	11	30	14	17	21	9	19	-16	3	4	-12	28	1	1	3	3	1	0	0	3	9	2	1.65	55	20.202	68	24.977	13	4.77502	29.2857	1	6	4	1	1	54	19.8347	-1	-0.367309	1
304	1	20	9	23	18	31	22	-11	14	-5	13	-9	27	1	0	3	2	1	1	0	2	7	2	1.58	40.75	16.3235	50	20.0288	9.25	3.70534	29.4286	2	5	2	1	1	43	17.2248	2.25	0.901298	0
306	0	11	13	4	4	12	m	2	-9	0	8	m	27	1	1	2	2	1	1	0	2	6	2	1.62	47	17.9089	58.7	22.367	11.7	4.45816	29.7143	2	2	3	m	m	m	m	m	m	m
307	0	6	1	24	11	6	8	-5	23	-13	-5	2	29	1	1	1	2	1	0	0	2	10	2	1.65	78	28.6501	89.8	32.9844	11.8	4.33425	30.5714	2	2	1	0	0	79	29.0174	1	0.367309	0
308	0	10	23	37	m	m	14	13	14	m	m	m	30	1	1	3	1	1	1	1	1	8	1	1.6	62	24.2188	78	30.4688	16	6.25	29.1429	1	4	4	0	1	64	25	2	0.78125	0
309	0	8	14	5	3	m	11	6	-9	-2	m	m	29	1	1	3	3	1	0	0	2	8	1	1.54	36	15.1796	45	18.9745	9	3.79491	29.5714	2	0	3	1	1	48	20.2395	12	5.05988	0
311	0	7	4	2	m	m	1	-3	-2	m	m	m	26	1	1	3	3	1	1	0	2	8	2	1.62	48	18.2899	55	20.9572	7	2.66728	29	2	1	1	0	0	46.5	17.7183	-1.5	-0.571559	1
312	0	11	10	4	m	3	m	-1	-6	m	m	m	27	1	1	3	2	1	1	0	2	7	1	1.68	60	21.2585	74	26.2188	14	4.96032	29.7143	2	0	3	m	m	m	m	m	m	m
316	1	8	18	19	4	29	m	10	1	-15	25	m	30	1	1	3	2	1	1	0	2	7	2	1.6	55	21.4844	62	24.2188	7	2.73438	30	1	8	4	m	m	m	m	m	m	m
317	0	11	5	5	16	5	8	-6	0	11	-11	3	29	1	1	3	3	2	1	0	2	7	2	1.67	58	20.7967	67	24.0238	9	3.22708	28	2	0	2	0	0	68	24.3824	10	3.58564	0
319	0	2	2	3	11	14	9	0	1	8	3	-5	32	1	1	3	2	1	1	0	3	9	1	1.62	53	20.1951	65	24.7676	12	4.57247	29	2	2	1	0	1	50	19.052	-3	-1.14312	1
320	1	18	24	9	25	14	22	6	-15	16	-11	8	25	1	0	3	2	1	1	0	3	6	2	1.6	56.95	22.2461	68.45	26.7383	11.5	4.49219	30.7143	1	0	4	0	0	65	25.3906	8.05	3.14453	0
323	0	5	14	7	16	m	m	9	-7	9	m	m	26	1	1	2	1	2	1	0	2	8	1	1.57	42	17.0392	52	21.0962	10	4.05696	29	2	3	3	m	m	m	m	m	m	m
324	0	13	13	12	11	13	m	0	-1	-1	2	m	35	1	1	2	3	1	1	0	2	7	1	1.63	52	19.5717	65	24.4646	13	4.89292	29	2	3	3	m	m	m	m	m	m	m
327	0	8	12	8	25	16	m	4	-4	17	-9	m	30	1	1	3	3	1	0	0	2	8	2	1.67	70	25.0995	82	29.4023	12	4.30277	28.8571	2	0	3	m	m	m	m	m	m	m
329	0	8	8	4	6	m	14	0	-4	2	m	m	26	1	1	3	3	1	0	0	3	9	m	1.63	52	19.5717	58	21.83	6	2.25827	29.5714	2	0	2	0	1	52	19.5717	0	0	1
331	0	10	10	3	3	12	m	0	-7	0	9	m	27	1	1	3	2	1	1	0	2	8	2	1.64	52	19.3337	59	21.9363	7	2.60262	30	2	4	3	m	m	m	m	m	m	m
333	0	8	4	11	24	15	5	-4	7	13	-9	-10	34	1	1	2	2	1	1	0	2	8	1	1.52	52.5	22.7233	58.6	25.3636	6.1	2.64024	29.2857	2	0	1	0	1	51	22.0741	-1.5	-0.649238	1
336	0	7	10	10	7	26	m	3	0	-3	19	m	27	1	1	3	1	1	0	0	2	7	2	1.65	55	20.202	65	23.8751	10	3.67309	29.5714	2	7	3	m	m	m	m	m	m	m
337	0	3	17	2	6	2	7	14	-15	4	-4	5	35	1	1	3	3	1	0	0	2	7	1	1.65	59.5	21.8549	65	23.8751	5.5	2.0202	28.2857	2	6	4	0	1	60	22.0386	0.5	0.183655	0
338	0	8	m	5	7	12	m	m	m	2	5	m	29	1	1	3	3	1	0	0	2	8	2	1.63	60	22.5827	74	27.852	14	5.2693	29	m	m	m	m	m	m	m	m	m	m
339	1	19	m	11	20	26	m	m	m	9	6	m	26	1	0	3	1	1	1	0	2	6	2	1.67	65	23.3067	75	26.8923	10	3.58564	29	m	m	m	m	m	m	m	m	m	m
341	0	4	0	3	6	1	0	-4	3	3	-5	-1	32	1	0	2	2	1	1	1	1	9	m	1.68	58	20.5499	70	24.8016	12	4.2517	28.2857	2	0	1	0	1	48	17.0068	-10	-3.54308	1
342	0	11	12	13	3	10	7	1	1	-10	7	-3	33	2	1	3	2	1	1	0	2	8	2	1.52	47	20.3428	55	23.8054	8	3.4626	28.4286	1	0	3	0	1	53	22.9398	6	2.59695	0
343	0	13	13	27	m	m	15	0	14	m	m	m	29	1	0	3	2	1	1	0	2	7	2	1.62	57.5	21.9098	70	26.6728	12.5	4.76299	28.7143	2	6	3	1	0	63	24.0055	5.5	2.09572	0
346	1	15	24	19	27	16	m	9	-5	8	-11	m	27	1	0	3	2	1	1	0	2	8	2	1.72	64.25	21.7178	81.06	27.3999	16.81	5.68213	29.1429	2	5	4	m	m	m	m	m	m	m
348	0	3	m	3	6	4	m	m	m	3	-2	m	27	1	1	3	2	1	1	0	2	6	2	1.67	61	21.8724	70	25.0995	9	3.22708	29.7143	m	m	m	m	m	m	m	m	m	m
349	0	14	4	6	31	8	16	-10	2	25	-23	8	35	1	1	3	2	1	1	1	2	5	1	1.63	m	m	63	23.7118	m	m	28.5714	2	6	1	0	1	62	23.3355	m	m	m
350	0	8	11	8	13	m	m	3	-3	5	m	m	28	1	1	3	2	1	0	1	2	8	1	1.6	56	21.875	65.5	25.5859	9.5	3.71094	29.5714	2	1	3	m	m	m	m	m	m	m
351	0	8	5	4	11	m	1	-3	-1	7	m	m	28	2	1	3	3	1	0	0	2	8	2	1.62	53	20.1951	64	24.3865	11	4.19143	30.5714	2	0	2	0	0	52	19.8141	-1	-0.381039	1
353	0	14	4	6	31	8	16	-10	2	25	-23	8	35	1	1	3	2	1	1	1	2	5	1	1.63	m	m	63	23.7118	m	m	28.5714	2	6	1	0	1	62	23.3355	m	m	m
354	1	12	32	16	15	26	25	20	-16	-1	11	-1	27	1	1	3	2	1	1	0	2	6	1	1.67	48	17.2111	56	20.0796	8	2.86851	29	1	0	4	1	1	54	19.3625	6	2.15139	0
355	0	3	m	10	1	25	m	m	m	-9	24	m	30	1	1	1	2	1	1	0	2	10	1	1.63	48	18.0662	60	22.5827	12	4.51654	29.2857	m	m	m	m	m	m	m	m	m	m
361	0	15	16	6	3	m	10	1	-10	-3	m	m	37	2	0	1	2	1	0	1	2	7	m	1.63	54	20.3244	64	24.0882	10	3.76378	30.8571	2	4	4	0	1	54	20.3244	0	0	1
362	0	7	9	11	11	5	8	2	2	0	-6	3	33	2	1	3	3	1	1	1	2	8	1	1.63	60.2	22.658	67	25.2174	6.8	2.55937	28.2857	2	3	2	0	0	58	21.83	-2.2	-0.828033	1
364	0	11	12	13	3	10	7	1	1	-10	7	-3	33	2	1	3	2	1	1	0	2	8	2	1.52	47	20.3428	55	23.8054	8	3.4626	28.4286	1	0	3	0	1	53	22.9398	6	2.59695	0
365	1	6	22	15	15	23	m	16	-7	0	8	m	30	1	1	3	m	1	0	0	3	10	2	1.67	49	17.5697	52.5	18.8246	3.5	1.25498	29	1	0	4	m	m	m	m	m	m	m
367	0	6	0	3	6	5	4	-6	3	3	-1	-1	30	1	1	3	2	1	0	0	2	7	1	1.61	60	23.1473	67	25.8478	7	2.70051	28.4286	1	2	1	0	0	52	20.061	-8	-3.0863	1
370	0	19	m	m	17	11	11	m	m	m	-6	0	28	2	m	1	3	1	1	0	1	4	1	1.56	40.5	16.642	45.5	18.6966	5	2.05457	28.5714	m	m	m	0	1	42	17.2584	1.5	0.616371	0
371	1	27	29	27	18	32	m	2	-2	-9	14	m	30	1	0	3	3	1	0	1	1	5	1	1.62	58	22.1003	71	27.0538	13	4.95351	29.4286	1	6	4	m	m	m	m	m	m	m
379	0	5	1	4	4	0	5	-4	3	0	-4	5	25	1	1	3	2	1	1	0	3	7	1	1.68	51	18.0697	58	20.5499	7	2.48016	29	2	0	1	0	1	51	18.0697	0	0	1
381	0	1	8	10	2	m	2	7	2	-8	m	m	23	1	0	3	2	1	1	1	2	10	1	1.68	54	19.1327	63	22.3214	9	3.18878	29.8571	1	0	2	1	0	54	19.1327	0	0	1
384	0	7	9	11	11	5	8	2	2	0	-6	3	33	2	1	3	3	1	1	1	2	8	1	1.62	59.6	22.71	67	25.5296	7.4	2.81969	28.2857	2	3	2	0	0	58	22.1003	-1.6	-0.609663	1
386	0	5	17	9	3	12	12	12	-8	-6	9	0	30	1	1	3	3	1	1	0	2	7	1	1.66	55	19.9594	63.5	23.044	8.5	3.08463	29.8571	2	1	4	0	0	55.5	20.1408	0.5	0.181449	0
387	0	10	28	28	6	19	2	18	0	-22	13	-17	32	1	1	2	1	1	1	0	2	8	2	1.6	50	19.5312	59	23.0469	9	3.51562	29.4286	2	6	4	0	1	51	19.9219	1	0.390625	0
388	1	11	m	m	6	31	m	m	m	m	25	m	30	1	1	3	3	1	1	1	2	7	m	1.64	49	18.2183	54.5	20.2632	5.5	2.04491	29.1429	m	m	m	m	m	m	m	m	m	m
392	0	6	6	4	16	m	m	0	-2	12	m	m	36	1	1	3	2	1	0	0	2	9	1	1.53	46.8	19.9923	53	22.6409	6.2	2.64855	29.2857	1	2	2	m	m	m	m	m	m	m
394	0	7	3	10	14	6	m	-4	7	4	-8	m	27	1	1	3	1	1	0	0	2	7	2	1.61	62	23.9188	65	25.0762	3	1.15736	28.1429	2	0	1	m	m	m	m	m	m	m
396	1	8	16	24	27	8	m	8	8	3	-19	m	25	1	1	2	2	1	0	0	2	7	2	1.63	55	20.7008	63	23.7118	8	3.01103	29.5714	2	7	4	m	m	m	m	m	m	m
397	0	12	6	8	6	m	m	-6	2	-2	m	m	33	1	1	3	3	1	1	1	2	7	2	1.65	58.5	21.4876	66.7	24.4995	8.2	3.01194	28.5714	1	6	2	m	m	m	m	m	m	m
398	0	14	5	8	6	13	m	-9	3	-2	7	m	27	1	1	3	2	1	1	1	2	8	2	1.6	60.5	23.6328	73.5	28.7109	13	5.07812	28.4286	1	0	2	m	m	m	m	m	m	m
400	1	20	29	18	27	m	m	9	-11	9	m	m	29	1	1	2	1	1	0	0	1	4	2	1.59	48	18.9866	57	22.5466	9	3.55999	29.2857	1	6	4	m	m	m	m	m	m	m
404	0	8	11	12	m	m	4	3	1	m	m	m	30	1	0	3	2	1	0	0	2	7	2	1.7	51	17.6471	57	19.7232	6	2.07612	28.5714	2	1	3	0	1	m	m	m	m	m
406	0	8	9	12	m	m	4	1	3	m	m	m	32	1	1	3	3	1	1	1	3	8	2	1.6	58	22.6562	65	25.3906	7	2.73438	28.7143	2	1	2	1	0	58.6	22.8906	0.6	0.234375	0
409	0	2	2	6	m	m	1	0	4	m	m	m	30	1	1	3	2	1	1	0	3	8	1	1.8	90	27.7778	94	29.0123	4	1.23457	28.7143	1	0	1	1	0	75	23.1481	-15	-4.62963	1
412	0	13	6	14	m	m	6	-7	8	m	m	m	28	1	1	3	3	1	1	1	2	7	1	1.6	46.5	18.1641	59.5	23.2422	13	5.07812	28.7143	2	2	2	0	0	48	18.75	1.5	0.585938	0
414	0	5	m	7	35	m	3	m	m	28	m	m	28	1	1	3	3	1	0	0	3	9	2	1.57	m	m	62	25.1532	m	m	28.7143	m	m	m	0	0	60	24.3418	m	m	m
416	0	8	2	5	m	m	9	-6	3	m	m	m	29	1	1	3	3	1	1	0	2	6	1	1.64	63	23.4236	69	25.6544	6	2.23081	29	2	0	1	0	0	57	21.1927	-6	-2.23081	1
417	0	7	6	8	m	m	3	-1	2	m	m	m	27	1	1	2	3	1	1	0	2	8	1	1.68	62	21.9671	72	25.5102	10	3.54308	28.8571	2	0	2	0	1	65	23.03	3	1.06293	0
418	0	13	7	17	m	m	2	-6	10	m	m	m	29	1	1	3	2	1	0	1	2	8	2	1.72	58	19.6052	70	23.6614	12	4.05625	27.8571	2	6	2	0	1	65	21.9713	7	2.36614	0
421	0	6	20	17	m	m	6	14	-3	m	m	m	34	1	1	3	2	1	1	1	2	8	2	1.55	49	20.3954	56	23.3091	7	2.91363	29.5714	2	0	4	0	0	47	19.563	-2	-0.832466	1
424	0	7	8	23	m	m	6	1	15	m	m	m	30	1	1	3	3	1	1	0	2	7	2	1.63	50	18.8189	58	21.83	8	3.01103	30.5714	2	3	2	0	0	56	21.0772	6	2.25827	0
425	0	4	m	18	8	m	m	m	m	-10	m	m	39	1	1	3	2	1	1	0	2	8	1	1.66	65	23.5883	73	26.4915	8	2.90318	30.8571	m	m	m	m	m	m	m	m	m	m
426	0	6	3	10	m	m	4	-3	7	m	m	m	31	1	1	3	3	1	1	0	2	8	2	1.63	47	17.6898	56	21.0772	9	3.38741	29	2	3	1	0	0	48	18.0662	1	0.376378	0
427	0	5	4	1	m	m	1	-1	-3	m	m	m	31	1	0	2	3	1	0	0	2	7	1	1.63	67.5	25.4055	80.5	30.2985	13	4.89292	29.8571	1	3	1	0	0	70	26.3465	2.5	0.940946	0
428	0	4	14	7	m	m	14	10	-7	m	m	m	27	1	0	2	2	1	0	0	2	7	1	1.63	48	18.0662	57	21.4536	9	3.38741	29.5714	2	2	3	1	0	48	18.0662	0	0	1
430	0	2	6	0	m	m	7	4	-6	m	m	m	29	1	0	3	3	1	1	1	3	8	2	1.62	52	19.8141	59	22.4813	7	2.66728	29.4286	2	0	2	0	1	59	22.4813	7	2.66728	0
431	0	10	7	4	m	m	0	-3	-3	m	m	m	35	1	0	3	1	1	1	1	2	8	m	1.65	43	15.7943	50	18.3655	7	2.57117	28.5714	2	0	2	0	m	44	16.1616	1	0.367309	0
432	0	11	14	3	7	12	7	3	-11	4	5	-5	28	1	1	3	2	1	1	0	2	7	2	1.74	75.62	24.9769	81	26.7539	5.38	1.77699	30.1429	1	0	3	0	0	72	23.7812	-3.62	-1.19567	1
433	0	11	1	10	m	m	3	-10	9	m	m	m	38	1	0	3	3	1	1	1	2	7	1	1.72	71	23.9995	78	26.3656	7	2.36614	28.5714	2	0	1	0	1	71	23.9995	0	0	1
434	0	23	17	25	m	m	11	-6	8	m	m	m	35	1	1	3	1	1	0	1	1	7	1	1.76	77	24.858	85	27.4406	8	2.58264	29.1429	1	5	4	0	1	85	27.4406	8	2.58264	0
435	0	13	4	m	m	m	6	-9	m	m	m	m	26	1	1	3	2	1	0	0	1	4	1	1.72	58	19.6052	68	22.9854	10	3.38021	28.2857	1	1	1	0	1	62	20.9573	4	1.35208	0
436	0	11	15	7	m	m	6	4	-8	m	m	m	28	1	1	2	1	1	0	0	2	7	2	1.64	42	15.6157	53.9	20.0402	11.9	4.42445	29.4286	2	0	3	1	0	45	16.7311	3	1.11541	0
438	0	8	13	8	9	13	5	5	-5	1	4	-8	28	2	0	1	2	1	0	0	2	7	2	1.56	50	20.5457	64	26.2985	14	5.75279	29.1429	2	2	3	0	1	50	20.5457	0	0	1
439	0	10	10	11	10	m	6	0	1	-1	m	m	28	1	1	3	3	1	1	1	2	9	2	1.68	62	21.9671	70	24.8016	8	2.83447	28.8571	2	0	3	0	1	65	23.03	3	1.06293	0
440	0	7	20	35	m	m	0	13	15	m	m	m	27	1	1	3	2	1	1	1	3	9	1	1.6	46	17.9688	56	21.875	10	3.90625	28.5714	2	7	4	m	0	52	20.3125	6	2.34375	0
441	1	12	14	21	37	m	23	2	7	16	m	m	36	2	1	3	3	1	0	0	2	7	1	1.6	60	23.4375	66	25.7812	6	2.34375	29	2	0	3	0	0	61	23.8281	1	0.390625	0
443	0	16	15	17	11	m	5	-1	2	-6	m	m	30	2	1	2	1	1	1	1	3	6	1	1.63	63	23.7118	69	25.9701	6	2.25827	29.1429	1	5	3	1	1	50	18.8189	-13	-4.89292	1
444	1	15	m	16	m	m	20	m	m	m	m	m	37	2	0	1	2	1	0	0	1	6	1	1.58	44.5	17.8257	54	21.6311	9.5	3.80548	29.1429	m	m	m	1	0	49	19.6283	4.5	1.8026	0
446	0	12	5	18	m	m	4	-7	13	m	m	m	22	1	1	2	3	1	0	1	2	8	2	1.68	65	23.03	79	27.9904	14	4.96032	28.5714	2	0	2	0	1	75	26.5731	10	3.54308	0
450	0	5	17	9	3	12	12	12	-8	-6	9	0	30	1	1	3	3	1	1	0	2	7	1	1.66	55	19.9594	63.5	23.044	8.5	3.08463	29.8571	2	1	4	0	0	55.5	20.1408	0.5	0.181449	0
451	0	11	30	14	17	21	9	19	-16	3	4	-12	28	1	1	3	3	1	0	0	3	9	2	1.65	55	20.202	68	24.977	13	4.77502	29.2857	1	6	4	1	1	54	19.8347	-1	-0.367309	1
453	0	4	10	2	m	m	1	6	-8	m	m	m	31	1	1	3	3	1	1	1	2	7	1	1.6	55	21.4844	64	25	9	3.51562	29.2857	2	5	3	0	0	60	23.4375	5	1.95312	0
454	0	14	16	2	m	m	11	2	-14	m	m	m	24	1	0	2	2	1	1	1	2	6	2	1.62	52	19.8141	56	21.3382	4	1.52416	29	2	5	4	0	0	47.5	18.0994	-4.5	-1.71468	1
457	0	10	10	4	m	m	4	0	-6	m	m	m	30	1	1	3	2	1	0	0	2	6	2	1.58	47	18.8271	61	24.4352	14	5.60808	28.8571	2	5	3	0	1	53	21.2306	6	2.40346	0
459	0	19	23	13	10	4	1	4	-10	-3	-6	-3	30	1	1	3	2	1	1	0	2	5	1	1.68	57	20.1956	67	23.7387	10	3.54308	28.1429	2	5	4	0	1	58.6	20.7625	1.6	0.566893	0
460	0	18	5	3	m	m	4	-13	-2	m	m	m	31	1	1	3	2	1	1	0	3	7	2	1.62	56.4	21.4906	67	25.5296	10.6	4.03902	28.7143	2	3	2	0	1	61	23.2434	4.6	1.75278	0
461	0	m	17	21	33	17	10	m	4	12	-16	-7	29	1	1	2	2	1	1	0	2	8	2	1.68	46	16.2982	54	19.1327	8	2.83447	29.5714	2	5	4	0	1	48	17.0068	2	0.708617	0
462	0	12	11	7	m	m	3	-1	-4	m	m	m	26	1	1	2	2	1	1	0	2	8	2	1.69	59	20.6575	67	23.4586	8	2.80102	29.4286	2	4	3	0	1	66.5	23.2835	7.5	2.62596	0
463	0	8	6	10	27	8	2	-2	4	17	-19	-6	28	1	1	3	2	1	0	0	2	8	2	1.65	58	21.3039	71	26.079	13	4.77502	28.1429	1	0	2	0	0	56	20.5693	-2	-0.734619	1
464	0	12	15	19	m	m	4	3	4	m	m	m	25	1	0	1	2	1	0	0	2	7	1	1.7	59	20.4152	68	23.5294	9	3.11419	28.7143	2	1	3	0	0	57	19.7232	-2	-0.692042	1
466	0	5	0	5	m	m	7	-5	5	m	m	m	27	1	1	3	2	1	1	1	3	8	1	1.69	50	17.5064	60	21.0077	10	3.50128	29.4286	2	0	1	0	1	51.5	18.0316	1.5	0.525192	0
467	0	3	1	4	m	m	7	-2	3	m	m	m	29	1	1	3	2	1	1	1	2	8	1	1.61	48	18.5178	58	22.3757	10	3.85788	28.7143	2	1	1	0	1	54	20.8325	6	2.31473	0
468	0	15	13	14	m	m	6	-2	1	m	m	m	27	1	1	3	2	1	0	0	2	9	1	1.65	50	18.3655	62	22.7732	12	4.40771	28.2857	2	0	3	0	1	57	20.9366	7	2.57117	0
470	0	23	4	m	11	18	5	-19	m	m	7	-13	33	1	1	3	3	1	0	0	2	4	1	1.67	65.45	23.468	59	21.1553	-6.45	-2.31274	29.8571	1	0	1	0	0	50	17.9282	-15.45	-5.53982	1
474	0	3	2	9	m	m	1	-1	7	m	m	m	38	2	1	3	2	1	1	1	3	8	2	1.65	53	19.4674	64	23.5078	11	4.0404	28.7143	2	0	1	0	0	54	19.8347	1	0.367309	0
476	0	4	2	7	m	m	0	-2	5	m	m	m	32	2	1	3	2	1	0	1	2	8	1	1.62	65.99	25.1448	72	27.4348	6.01	2.29005	29.4286	2	0	1	0	0	65	24.7676	-0.99	-0.377229	1
478	0	2	15	2	3	1	1	13	-13	1	-2	0	29	1	0	3	1	1	0	0	3	7	2	1.68	59	20.9042	70	24.8016	11	3.89739	28.4286	2	3	3	0	1	59	20.9042	0	0	1
479	0	17	13	19	4	9	7	-4	6	-15	5	-2	30	1	1	3	2	1	1	0	2	7	1	1.66	54	19.5965	62	22.4996	8	2.90318	27.8571	1	6	3	1	1	57	20.6852	3	1.08869	0
482	0	11	4	5	m	m	8	-7	1	m	m	m	27	1	1	3	2	1	1	1	2	8	1	1.6	50	19.5312	62	24.2188	12	4.6875	29	1	0	1	0	1	59	23.0469	9	3.51562	0
484	0	7	2	0	3	1	8	-5	-2	3	-2	7	26	1	1	2	1	1	0	1	2	8	1	1.58	67	26.8386	77	30.8444	10	4.00577	28.5714	2	0	1	0	1	m	m	m	m	m
485	0	11	3	0	m	m	7	-8	-3	m	m	m	35	1	1	3	2	1	0	0	2	6	2	1.63	64	24.0882	70	26.3465	6	2.25827	29.7143	2	1	1	1	0	60	22.5827	-4	-1.50551	1
486	1	11	4	23	m	m	19	-7	19	m	m	m	31	1	1	3	3	1	1	0	2	7	2	1.65	76	27.9155	79	29.0174	3	1.10193	29.2857	1	0	1	0	0	70	25.7117	-6	-2.20386	1
487	0	12	7	18	m	m	9	-5	11	m	m	m	37	2	1	3	3	1	0	0	2	8	1	1.57	45	18.2563	54.5	22.1104	9.5	3.85411	29.2857	1	3	2	0	1	49	19.8791	4	1.62278	0
488	1	22	18	24	m	m	20	-4	6	m	m	m	35	2	0	2	3	1	1	0	3	8	2	1.72	48.5	16.394	61	20.6193	12.5	4.22526	29	2	3	4	0	1	57	19.2672	8.5	2.87317	0
489	1	11	20	33	m	m	17	9	13	m	m	m	28	1	1	3	2	1	1	1	2	8	2	1.63	50.2	18.8942	60	22.5827	9.8	3.68851	29.7143	2	0	4	1	1	54	20.3244	3.8	1.43024	0
490	0	20	17	14	m	m	11	-3	-3	m	m	m	30	1	1	3	2	1	1	1	2	6	2	1.61	60	23.1473	74	28.5483	14	5.40103	29.4286	2	7	4	0	0	64.5	24.8833	4.5	1.73604	0
491	0	1	4	5	m	m	2	3	1	m	m	m	30	1	1	3	2	1	1	1	2	8	2	1.7	60	20.7612	71	24.5675	11	3.80623	30.5714	2	3	1	0	1	62	21.4533	2	0.692042	0
492	0	6	8	5	m	m	1	2	-3	m	m	m	26	1	1	3	2	1	1	0	2	9	1	1.63	47.6	17.9156	60	22.5827	12.4	4.66709	29	2	1	2	1	1	50	18.8189	2.4	0.903308	0
493	0	5	6	13	16	m	14	1	7	3	m	m	27	1	1	3	2	1	1	1	2	7	2	1.64	70	26.0262	80	29.7442	10	3.71802	28.8571	2	2	2	1	0	72.5	26.9557	2.5	0.929506	0
495	0	3	1	6	9	m	3	-2	5	3	m	m	29	1	1	3	1	1	1	0	2	6	2	1.74	65.5	21.6343	74.5	24.6069	9	2.97265	29	2	0	1	0	1	68.5	22.6252	3	0.990884	0
497	0	10	8	3	20	9	0	-2	-5	17	-11	-9	27	1	0	1	2	1	0	0	2	7	2	1.63	66.5	25.0292	76	28.6048	9.5	3.5756	29.7143	2	5	2	1	1	78	29.3575	11.5	4.32835	0
498	0	3	4	6	4	m	1	1	2	-2	m	m	27	1	1	3	3	1	1	0	2	10	2	1.64	58	21.5645	66	24.539	8	2.97442	28.8571	2	0	1	0	1	60	22.3081	2	0.743605	0
499	0	19	22	20	m	m	11	3	-2	m	m	m	31	2	0	2	3	1	0	0	1	6	1	1.6	49	19.1406	65	25.3906	16	6.25	29.4286	2	8	4	0	0	57	22.2656	8	3.125	0
500	0	27	m	m	29	39	12	m	m	m	10	-27	35	1	1	2	1	1	1	0	1	7	2	1.57	56	22.719	78	31.6443	22	8.92531	29.8571	m	m	m	0	0	75	30.4272	19	7.70822	0
501	0	7	16	15	m	m	8	9	-1	m	m	m	33	1	0	2	1	1	1	1	2	9	2	1.57	48	19.4734	61.5	24.9503	13.5	5.4769	30	1	3	4	0	1	54.5	22.1104	6.5	2.63702	0
502	0	6	20	3	6	0	8	14	-17	3	-6	8	26	1	1	2	2	1	1	0	2	8	1	1.69	80	28.0102	90	31.5115	10	3.50128	29.5714	2	5	4	0	1	70	24.5089	-10	-3.50128	1
503	0	7	13	8	m	m	9	6	-5	m	m	m	33	2	1	1	1	1	1	0	1	7	2	1.6	50	19.5312	63	24.6094	13	5.07812	29	2	2	3	0	0	60	23.4375	10	3.90625	0
504	0	11	5	13	13	4	6	-6	8	0	-9	2	32	2	0	3	2	1	1	1	1	6	2	1.6	58.6	22.8906	72	28.125	13.4	5.23438	28.8571	2	8	2	0	1	60	23.4375	1.4	0.546875	0
505	1	20	9	23	18	31	22	-11	14	-5	13	-9	27	1	0	3	2	1	1	0	2	7	2	1.58	40.75	16.3235	50	20.0288	9.25	3.70534	29.4286	2	5	2	1	1	43	17.2248	2.25	0.901298	0
506	0	5	3	5	m	m	5	-2	2	m	m	m	38	2	0	3	3	1	1	1	2	8	1	1.53	55	23.4952	65	27.7671	10	4.27186	28.8571	1	0	1	0	0	59	25.204	4	1.70874	0
507	0	0	7	5	21	4	3	7	-2	16	-17	-1	41	2	1	3	3	1	0	0	2	7	2	1.61	55	21.2183	66	25.462	11	4.24366	29	1	0	2	0	0	60	23.1473	5	1.92894	0
510	0	9	16	16	17	24	11	7	0	1	7	-13	29	1	1	3	2	1	1	1	2	7	1	1.62	44.35	16.8991	55.75	21.243	11.4	4.34385	29.8571	2	3	4	1	1	43.5	16.5752	-0.85	-0.323884	1
512	0	5	7	11	12	7	7	2	4	1	-5	0	31	2	0	3	2	1	0	0	2	8	1	1.55	56.2	23.3923	63	26.2227	6.8	2.83039	29.7143	2	3	2	0	0	55	22.8928	-1.2	-0.49948	1
513	0	8	11	6	m	m	11	3	-5	m	m	m	29	1	1	3	2	1	1	1	2	8	2	1.8	73	22.5309	90	27.7778	17	5.24691	29.4286	2	0	3	0	0	90	27.7778	17	5.24691	0
514	1	10	2	14	18	5	20	-8	12	4	-13	15	35	1	0	3	2	1	0	0	3	8	m	1.5	51	22.6667	56	24.8889	5	2.22222	28.4286	1	0	1	1	1	52	23.1111	1	0.444444	0
515	0	13	m	9	20	20	13	m	m	11	0	-7	26	2	0	2	1	2	0	0	2	8	1	1.66	48	17.4191	58.5	21.2295	10.5	3.81042	30	m	m	m	0	0	51	18.5078	3	1.08869	0
516	0	10	9	25	6	23	1	-1	16	-19	17	-22	24	1	0	1	1	1	1	0	2	7	m	1.6	54	21.0938	62	24.2188	8	3.125	29.5714	2	3	2	0	0	66.5	25.9766	12.5	4.88281	0
517	0	5	11	12	m	m	4	6	1	m	m	m	29	1	1	3	3	1	1	0	2	9	1	1.6	54	21.0938	60	23.4375	6	2.34375	29.8571	1	4	3	1	1	60	23.4375	6	2.34375	0
518	0	1	1	0	m	m	0	0	-1	m	m	m	32	1	1	3	3	1	1	0	2	9	2	1.68	57	20.1956	67	23.7387	10	3.54308	30.4286	2	0	1	0	0	62.5	22.1443	5.5	1.9487	0
520	0	11	35	m	5	22	5	24	m	m	17	-17	27	1	1	3	2	1	1	1	2	8	1	1.67	54	19.3625	62	22.231	8	2.86851	29.7143	1	8	4	1	1	55	19.721	1	0.358564	0
521	0	3	4	1	m	m	5	1	-3	m	m	m	27	m	1	3	2	1	0	0	2	8	1	1.67	67	24.0238	74.5	26.713	7.5	2.68923	28.8571	2	0	1	1	0	61.5	22.0517	-5.5	-1.9721	1
523	0	9	m	15	14	m	m	m	m	-1	m	m	29	1	1	3	1	1	1	0	2	7	2	1.76	m	m	74	23.8895	m	m	29.5714	m	m	m	m	m	m	m	m	m	m
524	0	6	1	24	11	6	8	-5	23	-13	-5	2	29	1	1	1	2	1	0	0	2	10	2	1.62	78	29.7211	89.8	34.2173	11.8	4.49627	30.5714	2	2	1	0	0	79	30.1021	1	0.381039	0
525	0	7	18	3	17	m	9	11	-15	14	m	m	38	1	1	3	2	2	1	0	2	8	m	1.58	59	23.634	68	27.2392	9	3.60519	29.8571	1	4	4	1	1	52	20.83	-7	-2.80404	1
526	0	12	m	12	m	m	10	m	m	m	m	m	28	2	1	3	2	1	1	1	3	10	1	1.65	54	19.8347	63	23.1405	9	3.30579	29.5714	m	m	m	1	0	55	20.202	1	0.367309	0
527	0	9	7	9	10	m	10	-2	2	1	m	m	27	1	1	3	2	1	1	1	2	6	2	1.63	63	23.7118	70	26.3465	7	2.63465	29.4286	1	2	2	1	1	55	20.7008	-8	-3.01103	1
528	0	7	m	5	m	m	0	m	m	m	m	m	32	2	1	3	3	1	1	1	2	8	2	1.68	58.45	20.7093	65.5	23.2072	7.05	2.49787	29.8571	m	m	m	0	1	60	21.2585	1.55	0.549178	0
529	0	7	3	9	m	m	2	-4	6	m	m	m	36	1	1	3	3	1	0	1	1	2	2	1.58	57.5	23.0332	65	26.0375	7.5	3.00433	29	2	0	1	0	0	59	23.634	1.5	0.600865	0
530	0	13	7	3	m	m	3	-6	-4	m	m	m	29	1	1	3	3	1	1	1	2	8	2	1.63	47	17.6898	51	19.1953	4	1.50551	29	2	0	2	0	0	43.5	16.3725	-3.5	-1.31732	1
532	0	11	m	3	m	m	9	m	m	m	m	m	30	1	1	3	3	1	0	0	2	8	2	1.6	43.15	16.8555	53	20.7031	9.85	3.84766	29.1429	m	m	m	0	1	55	21.4844	11.85	4.62891	0
533	0	19	m	5	2	11	11	m	m	-3	9	0	34	2	1	1	3	1	0	1	3	8	m	1.64	52	19.3337	57	21.1927	5	1.85901	29.7143	1	m	m	1	0	54	20.0773	2	0.743605	0
536	0	14	8	4	m	m	6	-6	-4	m	m	m	30	1	1	3	3	1	0	0	2	8	1	1.62	60	22.8624	70	26.6728	10	3.81039	29.1429	2	4	2	0	1	81	30.8642	21	8.00183	0
537	0	11	11	11	m	m	7	0	0	m	m	m	33	2	0	3	3	1	0	1	2	7	2	1.58	46	18.4265	55	22.0317	9	3.60519	29.5714	2	0	3	0	1	49	19.6283	3	1.20173	0
539	0	13	19	20	35	25	5	6	1	15	-10	-20	26	1	1	2	1	1	1	0	2	5	1	1.58	45	18.026	56	22.4323	11	4.40635	29.5714	2	6	4	0	1	50	20.0288	5	2.00288	0
540	1	9	0	6	m	m	19	-9	6	m	m	m	35	2	1	3	3	1	1	0	2	8	1	1.65	53	19.4674	61	22.4059	8	2.93848	28.7143	2	2	1	1	1	59	21.6713	6	2.20386	0
541	0	15	3	4	m	m	13	-12	1	m	m	m	33	1	1	3	2	1	0	0	1	7	1	1.58	51	20.4294	61.7	24.7156	10.7	4.28617	28	2	0	1	0	1	51.5	20.6297	0.5	0.200288	0
542	0	5	19	21	21	6	9	14	2	0	-15	3	34	1	1	2	2	1	0	0	1	8	2	1.65	49	17.9982	65	23.8751	16	5.87695	30.7143	2	3	4	0	1	54	19.8347	5	1.83655	0
543	0	7	10	10	7	26	m	3	0	-3	19	m	27	1	1	3	1	1	0	0	2	7	2	1.65	55	20.202	65	23.8751	10	3.67309	29.5714	2	7	3	m	m	m	m	m	m	m
545	0	9	14	16	12	m	7	5	2	-4	m	m	29	1	1	3	3	1	0	1	3	7	1	1.56	48.75	20.0321	62	25.4767	13.25	5.44461	29.5714	2	3	3	0	1	50	20.5457	1.25	0.513642	0
546	0	16	m	14	m	m	3	m	m	m	m	m	28	2	1	2	2	1	1	0	2	8	1	1.58	60	24.0346	67	26.8386	7	2.80404	29.5714	m	m	m	0	0	66	26.4381	6	2.40346	0
547	1	10	3	6	m	m	19	-7	3	m	m	m	29	2	0	2	1	1	0	0	3	6	2	1.72	80	27.0416	86	29.0698	6	2.02812	29.1429	1	2	1	1	0	80	27.0416	0	0	1
548	0	5	2	7	13	m	6	-3	5	6	m	m	29	1	1	2	1	1	0	1	3	8	1	1.75	64	20.898	68	22.2041	4	1.30612	29.2857	2	1	1	0	1	50	16.3265	-14	-4.57143	1
550	0	9	9	5	m	m	4	0	-4	m	m	m	33	2	1	3	3	1	1	1	2	7	2	1.7	63.5	21.9723	72	24.9135	8.5	2.94118	29	2	2	2	1	0	62	21.4533	-1.5	-0.519031	1
552	0	12	10	8	6	2	m	-2	-2	-2	-4	m	33	2	1	3	3	1	1	0	2	10	2	1.58	58	23.2335	68	27.2392	10	4.00577	28.5714	2	0	3	m	m	m	m	m	m	m
555	0	6	13	7	8	20	10	7	-6	1	12	-10	29	1	1	2	2	1	1	0	3	8	2	1.7	56	19.3772	63	21.7993	7	2.42215	29.2857	2	4	3	0	0	50	17.301	-6	-2.07612	1
558	0	7	0	2	17	m	6	-7	2	15	m	m	26	1	0	1	1	1	0	0	2	7	1	1.63	57	21.4536	75	28.2284	18	6.77481	29	2	0	1	1	0	m	m	m	m	m
570	0	4	m	6	12	4	m	m	m	6	-8	m	35	2	0	1	1	1	1	0	2	7	2	1.57	69	27.993	76	30.8329	7	2.83987	29	m	m	m	m	m	m	m	m	m	m
574	0	8	12	10	12	5	7	4	-2	2	-7	2	26	1	1	3	3	1	0	0	3	8	2	1.68	57.5	20.3727	68	24.093	10.5	3.72024	m	m	7	3	0	0	57.5	20.3727	0	0	1
580	1	19	m	11	20	26	m	m	m	9	6	m	26	1	0	3	1	1	1	0	2	6	2	1.67	65	23.3067	75	26.8923	10	3.58564	29	m	m	m	m	m	m	m	m	m	m
581	0	23	21	22	9	22	5	-2	1	-13	13	-17	29	1	1	2	2	1	0	0	2	7	1	1.5	42	18.6667	49	21.7778	7	3.11111	29.1429	2	6	4	0	1	42	18.6667	0	0	1
588	0	4	2	9	7	2	m	-2	7	-2	-5	m	31	2	0	2	2	1	1	0	2	9	1	1.6	55.8	21.7969	65.4	25.5469	9.6	3.75	28.2857	2	1	1	m	m	m	m	m	m	m
589	1	27	29	27	18	32	m	2	-2	-9	14	m	30	1	0	3	3	1	0	1	1	5	1	1.62	58	22.1003	71	27.0538	13	4.95351	29.4286	1	6	4	m	m	m	m	m	m	m
591	0	6	9	5	5	9	m	3	-4	0	4	m	26	2	1	1	1	1	1	0	1	7	2	1.63	54	20.3244	65	24.4646	11	4.14016	30.4286	2	2	2	m	m	m	m	m	m	m
592	0	22	7	19	21	6	4	-15	12	2	-15	-2	33	1	1	3	3	1	1	0	2	7	1	1.64	65.9	24.5018	72.5	26.9557	6.6	2.4539	29.2857	2	1	2	0	1	70	26.0262	4.1	1.52439	0
593	0	6	15	m	26	17	4	9	m	m	-9	-13	32	1	0	3	2	1	1	1	2	5	m	1.65	49	17.9982	59	21.6713	10	3.67309	29.7143	2	5	3	1	0	50	18.3655	1	0.367309	0
603	0	6	27	10	10	7	0	21	-17	0	-3	-7	30	1	0	3	2	1	1	0	2	7	2	1.61	65	25.0762	72.3	27.8924	7.3	2.81625	28.7143	2	3	4	0	1	60	23.1473	-5	-1.92894	1
607	0	6	15	3	4	19	5	9	-12	1	15	-14	26	1	1	2	2	1	1	0	1	6	1	1.63	70	26.3465	76	28.6048	6	2.25827	30.4286	2	0	3	0	1	66	24.841	-4	-1.50551	1
616	0	7	9	6	21	m	5	2	-3	15	m	m	29	1	0	3	2	1	1	1	2	8	2	1.65	44.6	16.382	53	19.4674	8.4	3.0854	29.1429	2	0	2	0	0	45	16.5289	0.4	0.146924	0
626	0	2	3	0	5	1	1	1	-3	5	-4	0	30	2	0	1	1	1	1	0	2	8	m	1.63	72	27.0993	87	32.7449	15	5.64568	29	1	0	1	0	1	75	28.2284	3	1.12914	0
628	0	8	12	10	12	5	7	4	-2	2	-7	2	26	1	1	3	3	1	0	0	3	8	2	1.68	57.5	20.3727	68.5	24.2701	11	3.89739	m	m	7	3	0	0	57.5	20.3727	0	0	1
634	0	20	m	8	0	6	m	m	m	-8	6	m	27	1	1	3	3	1	0	0	2	9	2	1.6	51.5	20.1172	60	23.4375	8.5	3.32031	29	m	m	m	m	m	m	m	m	m	m
635	0	9	m	16	12	4	6	m	m	-4	-8	2	31	1	1	3	2	1	1	1	3	8	1	1.64	61.4	22.8287	70	26.0262	8.6	3.1975	28	m	m	m	0	0	57	21.1927	-4.4	-1.63593	1
637	0	1	23	12	6	m	1	22	-11	-6	m	m	28	1	1	2	3	1	0	0	1	8	2	1.64	45.8	17.0286	51.5	19.1478	5.7	2.11927	29.7143	2	0	4	0	0	50	18.5901	4.2	1.56157	0
641	0	14	3	3	5	14	m	-11	0	2	9	m	30	1	1	3	3	1	1	0	3	7	2	1.65	54	19.8347	58.5	21.4876	4.5	1.65289	27.8571	2	4	1	m	m	m	m	m	m	m
643	0	6	8	22	1	0	m	2	14	-21	-1	m	26	1	1	3	2	1	1	1	2	8	2	1.58	52	20.83	64.5	25.8372	12.5	5.00721	29.5714	2	3	2	m	m	m	m	m	m	m
645	0	3	6	2	11	8	1	3	-4	9	-3	-7	33	2	1	3	3	1	0	1	2	8	2	1.65	51	18.7328	62	22.7732	11	4.0404	29.1429	2	0	2	0	0	55	20.202	4	1.46924	0
648	0	8	7	6	0	m	2	-1	-1	-6	m	m	27	1	1	3	2	1	1	1	3	8	2	1.63	61.5	23.1473	69	25.9701	7.5	2.82284	28.5714	2	5	2	1	0	65	24.4646	3.5	1.31732	0
649	0	2	5	4	4	7	3	3	-1	0	3	-4	28	1	0	1	2	1	0	0	2	8	1	1.58	44	17.6254	47	18.8271	3	1.20173	29.1429	2	0	2	1	1	47	18.8271	3	1.20173	0
650	0	9	29	8	3	7	2	20	-21	-5	4	-5	30	1	1	3	3	1	0	0	1	6	1	1.66	58	21.048	70	25.4028	12	4.35477	29.7143	2	6	4	0	1	60	21.7738	2	0.725795	0
651	0	9	29	8	3	7	2	20	-21	-5	4	-5	30	1	1	3	3	1	0	0	1	6	1	1.66	58	21.048	70	25.4028	12	4.35477	29.7143	2	6	4	0	1	60	21.7738	2	0.725795	0
652	0	2	m	11	m	m	6	m	m	m	m	m	29	1	1	3	2	1	1	0	2	8	1	1.65	71	26.079	77	28.2828	6	2.20386	29.7143	m	m	m	0	0	72	26.4463	1	0.367309	0
653	0	8	6	6	21	7	4	-2	0	15	-14	-3	30	1	1	m	2	1	1	0	2	7	2	1.6	65	25.3906	72	28.125	7	2.73438	28.8571	1	0	2	0	0	65	25.3906	0	0	1
655	0	6	9	15	m	m	9	3	6	m	m	m	29	2	1	3	3	1	0	0	2	7	2	1.63	70	26.3465	81	30.4867	11	4.14016	29	2	3	2	0	1	60	22.5827	-10	-3.76378	1
656	0	8	14	10	4	2	1	6	-4	-6	-2	-1	32	1	1	3	2	1	1	0	2	8	1	1.63	68	25.5937	75	28.2284	7	2.63465	29	2	0	3	0	0	70	26.3465	2	0.752757	0
658	0	21	15	15	17	m	8	-6	0	2	m	m	28	1	0	3	2	1	1	1	2	7	1	1.63	54	20.3244	63	23.7118	9	3.38741	29.4286	2	8	3	1	0	54.5	20.5126	0.5	0.188189	0
663	0	7	7	5	5	m	6	0	-2	0	m	m	34	2	1	3	3	1	1	1	2	8	m	1.62	64	24.3865	67	25.5296	3	1.14312	28	2	2	2	0	1	50	19.052	-14	-5.33455	1
664	0	6	7	3	14	m	8	1	-4	11	m	m	27	1	1	1	1	1	1	0	1	7	1	1.62	58	22.1003	65.85	25.0914	7.85	2.99116	28.8571	2	6	2	0	1	47	17.9089	-11	-4.19143	1
665	0	13	15	9	m	m	6	2	-6	m	m	m	40	2	0	1	3	2	1	0	2	8	1	1.6	60	23.4375	70	27.3438	10	3.90625	29.4286	2	2	3	1	1	58	22.6562	-2	-0.78125	1
667	0	10	m	11	m	m	4	m	m	m	m	m	34	2	1	2	3	1	0	1	3	9	2	1.63	58	21.83	65	24.4646	7	2.63465	29.7143	m	m	m	0	0	65	24.4646	7	2.63465	0
668	0	12	11	3	4	6	8	-1	-8	1	2	2	29	1	1	3	3	1	1	0	3	8	2	1.62	50.5	19.2425	58.5	22.2908	8	3.04832	28.2857	2	0	3	0	0	51	19.433	0.5	0.19052	0
669	0	23	26	30	m	m	8	3	4	m	m	m	35	1	1	3	3	1	1	0	2	6	2	1.68	55	19.487	69	24.4473	14	4.96032	29	2	0	4	0	1	58	20.5499	3	1.06293	0
670	0	13	7	12	m	m	10	-6	5	m	m	m	31	1	1	2	2	1	1	0	2	5	2	1.54	56	23.6128	66	27.8293	10	4.21656	30	2	8	2	0	1	58	24.4561	2	0.843313	0
671	0	7	5	5	1	m	m	-2	0	-4	m	m	30	2	1	3	3	1	1	0	3	9	1	1.66	58	21.048	69	25.0399	11	3.99187	29	2	3	2	m	m	m	m	m	m	m
672	0	12	13	4	m	m	7	1	-9	m	m	m	36	2	1	3	2	1	0	0	2	8	2	1.68	79.4	28.1321	86.5	30.6477	7.1	2.51559	29	1	2	3	0	1	65	23.03	-14.4	-5.10204	1
673	0	11	m	7	m	m	5	m	m	m	m	m	31	1	1	3	2	1	1	0	2	7	1	1.7	58	20.0692	65	22.4913	7	2.42215	29.8571	m	m	m	0	1	56	19.3772	-2	-0.692042	1
674	0	13	1	5	m	m	7	-12	4	m	m	m	26	1	1	1	2	1	1	0	2	7	1	1.6	65	25.3906	72	28.125	7	2.73438	29.1429	2	0	1	0	1	67	26.1719	2	0.78125	0
675	1	13	36	15	14	m	20	23	-21	-1	m	m	34	1	1	3	2	1	1	0	2	7	1	1.65	72	26.4463	82	30.1194	10	3.67309	29.4286	1	7	4	0	1	72	26.4463	0	0	1
676	0	20	33	12	29	16	15	13	-21	17	-13	-1	40	1	1	3	2	1	1	0	3	8	2	1.52	43	18.6115	55.6	24.0651	12.6	5.4536	29.7143	2	6	4	1	1	51	22.0741	8	3.4626	0
677	0	11	7	3	m	m	8	-4	-4	m	m	m	28	2	0	2	3	1	1	0	2	8	1	1.65	58	21.3039	66	24.2424	8	2.93848	29.1429	2	2	2	0	0	58	21.3039	0	0	1
679	1	11	21	14	5	18	35	10	-7	-9	13	17	39	2	1	3	2	1	0	1	2	7	1	1.65	54	19.8347	69	25.3444	15	5.50964	28.8571	1	7	4	1	0	60	22.0386	6	2.20386	0
680	0	11	5	5	16	5	8	-6	0	11	-11	3	29	1	1	3	3	2	1	0	2	7	2	1.67	58	20.7967	67	24.0238	9	3.22708	28	2	0	2	0	0	68	24.3824	10	3.58564	0
681	0	14	6	21	10	14	m	-8	15	-11	4	m	32	1	1	3	3	1	0	0	2	5	1	1.6	51	19.9219	61.1	23.8672	10.1	3.94531	29	1	2	2	m	m	m	m	m	m	m
685	0	6	6	17	m	m	0	0	11	m	m	m	28	1	1	3	3	1	1	0	2	8	1	1.63	47.5	17.878	55	20.7008	7.5	2.82284	29.1429	2	0	2	0	1	47	17.6898	-0.5	-0.188189	1
686	0	19	m	m	17	11	11	m	m	m	-6	0	28	2	m	1	3	1	1	0	1	4	1	1.58	40.5	16.2234	46	18.4265	5.5	2.20317	28.5714	m	m	m	0	1	41	16.4237	0.5	0.200288	0
687	0	8	4	6	12	6	9	-4	2	6	-6	3	33	1	1	3	2	1	1	0	2	8	2	1.58	53.75	21.531	64	25.6369	10.25	4.10591	28.4286	2	2	1	0	0	53.5	21.4309	-0.25	-0.100144	1
688	0	7	7	16	m	m	2	0	9	m	m	m	31	1	1	3	1	1	1	0	2	8	2	1.65	64	23.5078	71	26.079	7	2.57117	29.5714	2	0	2	0	1	65	23.8751	1	0.367309	0
689	0	9	13	9	m	m	1	4	-4	m	m	m	31	1	0	1	2	1	0	0	2	6	2	1.65	50	18.3655	64	23.5078	14	5.14233	29	2	0	3	1	1	56	20.5693	6	2.20386	0
691	0	15	31	16	11	m	5	16	-15	-5	m	m	34	1	0	2	1	1	1	0	3	5	1	1.52	54	23.3726	64	27.7008	10	4.32825	29	2	2	4	1	1	55	23.8054	1	0.432825	0
692	0	13	14	13	m	m	5	1	-1	m	m	m	34	2	1	3	2	1	1	0	2	8	1	1.55	50	20.8117	56	23.3091	6	2.4974	29	2	6	3	0	1	50	20.8117	0	0	1
693	0	11	12	7	m	m	2	1	-5	m	m	m	26	1	1	2	2	1	0	0	2	8	m	1.64	50	18.5901	56	20.8209	6	2.23081	29.1429	2	2	3	0	1	56	20.8209	6	2.23081	0
695	0	5	2	5	m	m	3	-3	3	m	m	m	31	2	1	2	2	1	0	1	2	8	1	1.64	66	24.539	78	29.0006	12	4.46163	29	1	0	1	0	0	70	26.0262	4	1.48721	0
697	1	11	25	11	18	1	23	14	-14	7	-17	22	27	1	0	3	2	1	1	1	2	7	2	1.58	41.6	16.664	52.8	21.1505	11.2	4.48646	29.1429	2	4	4	0	1	48	19.2277	6.4	2.56369	0
701	0	15	m	31	m	m	9	m	m	m	m	m	30	1	1	3	3	1	1	0	2	6	1	1.6	49.8	19.4531	64	25	14.2	5.54688	30	m	m	m	0	0	54	21.0938	4.2	1.64062	0
702	0	8	21	9	12	6	4	13	-12	3	-6	-2	34	1	1	2	1	1	1	1	2	8	1	1.62	60.32	22.9843	65	24.7676	4.68	1.78326	29.8571	2	6	4	0	1	57	21.7193	-3.32	-1.26505	1
703	0	5	19	14	m	m	6	14	-5	m	m	m	30	1	0	2	2	1	0	0	1	6	1	1.7	57	19.7232	68	23.5294	11	3.80623	28	1	m	4	0	1	60	20.7612	3	1.03806	0
705	1	11	m	m	6	31	m	m	m	m	25	m	30	1	1	3	3	1	1	1	2	7	m	1.64	49	18.2183	54.5	20.2632	5.5	2.04491	29.1429	m	m	m	m	m	m	m	m	m	m
706	0	14	17	7	m	m	17	3	-10	m	m	m	36	1	0	3	1	1	0	0	2	8	1	1.7	51	17.6471	64	22.1453	13	4.49827	29	2	6	4	0	1	55	19.0311	4	1.38408	0
707	0	25	1	9	1	16	5	-24	8	-8	15	-11	27	1	1	3	2	1	1	m	2	5	1	1.55	55	22.8928	75	31.2175	20	8.32466	30.5714	1	0	1	1	0	62	25.8065	7	2.91363	0
708	0	2	0	m	3	2	m	-2	m	m	-1	m	18	1	1	2	1	1	1	0	3	8	m	1.55	55	22.8928	57	23.7253	2	0.832466	29	2	0	1	m	m	m	m	m	m	m
709	0	3	4	2	m	m	5	1	-2	m	m	m	30	1	1	3	2	1	1	0	2	6	1	1.6	46	17.9688	53	20.7031	7	2.73438	29	1	0	1	0	1	m	m	m	m	m
710	0	15	25	30	m	m	5	10	5	m	m	m	30	1	1	3	1	1	1	1	2	7	1	1.7	55.5	19.2042	62	21.4533	6.5	2.24913	30	2	3	4	0	0	55	19.0311	-0.5	-0.17301	1
713	0	6	7	2	4	0	1	1	-5	2	-4	1	30	1	1	3	2	1	m	0	2	8	2	1.58	m	m	m	m	m	m	30.8571	2	0	2	0	1	56	22.4323	m	m	m
714	0	7	0	7	m	m	2	-7	7	m	m	m	32	2	m	m	1	1	1	1	2	9	1	1.6	52	20.3125	65	25.3906	13	5.07812	30	2	0	1	0	1	60	23.4375	8	3.125	0
715	0	5	m	7	35	m	3	m	m	28	m	m	28	1	1	3	3	1	0	0	3	9	2	1.57	m	m	62	25.1532	m	m	28.7143	m	m	m	0	0	60	24.3418	m	m	m
716	0	3	2	4	9	4	5	-1	2	5	-5	1	30	1	1	3	3	1	1	0	2	9	1	1.63	54	20.3244	64	24.0882	10	3.76378	28.7143	2	0	1	0	1	55	20.7008	1	0.376378	0
717	0	5	1	4	4	0	5	-4	3	0	-4	5	25	1	1	3	2	1	1	0	3	7	1	1.68	51	18.0697	58	20.5499	7	2.48016	29	2	0	1	0	1	51	18.0697	0	0	1
718	0	6	13	7	8	20	10	7	-6	1	12	-10	29	1	1	2	2	1	1	0	3	8	2	1.7	56	19.3772	63	21.7993	7	2.42215	29.2857	2	4	3	0	0	50	17.301	-6	-2.07612	1
719	0	7	12	12	17	15	9	5	0	5	-2	-6	34	1	1	2	1	1	1	1	2	6	1	1.63	47.9	18.0285	54.3	20.4374	6.4	2.40882	30.8571	2	0	3	0	0	46	17.3134	-1.9	-0.715119	1
720	0	11	14	3	7	12	7	3	-11	4	5	-5	28	1	1	3	2	1	1	0	2	7	2	1.75	75	24.4898	81	26.449	6	1.95918	30.1429	1	0	3	0	0	72	23.5102	-3	-0.979592	1
724	0	2	m	5	27	13	2	m	m	22	-14	-11	27	1	1	3	2	1	1	0	2	7	1	1.7	56	19.3772	68.9	23.8408	12.9	4.46367	28	m	m	m	0	1	66	22.8374	10	3.46021	0
725	0	15	25	7	3	2	5	10	-18	-4	-1	3	29	1	1	3	3	1	1	0	2	8	2	1.63	55	20.7008	61	22.9591	6	2.25827	29.5714	1	0	4	0	0	51	19.1953	-4	-1.50551	1
727	1	2	6	20	17	35	23	4	14	-3	18	-12	34	1	0	3	1	1	0	m	m	m	1	1.55	48.5	20.1873	57.5	23.9334	9	3.7461	28.2857	2	0	2	0	1	48.5	20.1873	0	0	1
728	0	18	3	5	19	m	6	-15	2	14	m	m	30	1	1	3	1	1	1	0	2	7	1	1.66	59	21.4109	70	25.4028	11	3.99187	29.1429	2	0	1	0	1	55	19.9594	-4	-1.45159	1
729	0	8	27	12	12	6	6	19	-15	0	-6	0	31	1	0	3	3	1	1	0	2	6	2	1.64	66	24.539	77	28.6288	11	4.08983	29.7143	2	6	4	1	0	m	m	m	m	m
731	0	13	m	m	16	20	m	m	m	m	4	m	28	1	1	3	3	1	1	0	2	7	m	1.73	60	20.0474	73	24.3911	13	4.34361	30.4286	m	m	m	m	m	m	m	m	m	m
735	0	7	4	8	m	m	7	-3	4	m	m	m	32	1	1	m	3	2	1	0	3	9	2	1.64	m	m	61.1	22.7171	m	m	28	2	0	1	0	1	55	20.4491	m	m	m
738	0	13	m	24	m	m	11	m	m	m	m	m	29	2	1	3	3	1	0	0	2	8	1	1.6	68.5	26.7578	82	32.0312	13.5	5.27344	28	m	m	m	0	1	m	m	m	m	m
740	0	11	10	12	m	m	3	-1	2	m	m	m	21	1	1	1	2	1	0	0	2	7	1	1.58	51	20.4294	56	22.4323	5	2.00288	29	2	3	3	0	0	50	20.0288	-1	-0.400577	1
741	0	4	7	7	m	m	0	3	0	m	m	m	31	1	1	3	2	1	1	1	2	8	1	1.68	55	19.487	65	23.03	10	3.54308	29	2	6	2	0	1	65	23.03	10	3.54308	0
742	0	19	23	13	10	4	1	4	-10	-3	-6	-3	30	1	1	3	2	1	1	0	2	5	1	1.68	57	20.1956	67	23.7387	10	3.54308	28.1429	2	5	4	0	1	58.6	20.7625	1.6	0.566893	0
743	0	19	10	4	m	m	2	-9	-6	m	m	m	32	1	1	3	3	1	1	1	2	7	1	1.58	53	21.2306	62	24.8358	9	3.60519	29	2	0	3	0	0	52	20.83	-1	-0.400577	1
745	0	3	m	11	m	m	3	m	m	m	m	m	40	2	1	1	2	1	1	0	2	8	1	1.55	55	22.8928	60	24.974	5	2.08117	30	m	m	m	0	0	56	23.3091	1	0.416233	0
753	0	14	21	12	24	m	9	7	-9	12	m	m	26	1	1	1	1	1	1	1	2	8	1	1.58	43	17.2248	51	20.4294	8	3.20461	28	2	4	4	0	1	45	18.026	2	0.801154	0
754	0	9	1	3	3	1	2	-8	2	0	-2	1	31	1	1	3	3	1	1	0	3	6	2	1.58	51	20.4294	58.1	23.2735	7.1	2.8441	28.2857	1	0	1	1	0	55	22.0317	4	1.60231	0
757	1	21	23	30	27	27	33	2	7	-3	0	6	29	1	1	3	3	1	1	0	3	7	1	1.58	49	19.6283	55	22.0317	6	2.40346	29.1429	2	0	4	1	1	51	20.4294	2	0.801154	0
759	0	4	10	6	11	m	14	6	-4	5	m	m	29	1	0	3	2	1	1	0	2	8	2	1.58	45	18.026	54	21.6311	9	3.60519	28	2	0	3	0	1	48	19.2277	3	1.20173	0
761	0	7	5	2	1	m	1	-2	-3	-1	m	m	32	1	1	3	2	1	1	0	2	8	m	1.68	61	21.6128	67	23.7387	6	2.12585	29.2857	2	2	2	0	1	65	23.03	4	1.41723	0
762	0	7	m	27	m	m	7	m	m	m	m	m	35	1	1	3	2	1	0	0	2	8	2	1.6	59	23.0469	71.8	28.0469	12.8	5	29.5714	1	0	m	0	1	63	24.6094	4	1.5625	0
765	0	15	7	3	4	12	7	-8	-4	1	8	-5	34	2	0	3	2	1	1	0	2	7	1	1.58	41	16.4237	51	20.4294	10	4.00577	29.2857	1	0	2	1	1	50	20.0288	9	3.60519	0
766	0	9	4	17	m	m	10	-5	13	m	m	m	31	1	1	3	2	1	1	1	1	7	1	1.6	54	21.0938	59.5	23.2422	5.5	2.14844	29.4286	2	0	1	1	0	54	21.0938	0	0	1
767	0	13	24	18	m	m	8	11	-6	m	m	m	23	1	0	1	2	1	1	0	2	8	1	1.63	59	22.2063	75	28.2284	16	6.02206	29.8571	2	6	4	1	0	70	26.3465	11	4.14016	0
773	0	19	23	13	10	4	1	4	-10	-3	-6	-3	30	1	1	3	2	1	1	0	2	5	1	1.68	57	20.1956	67	23.7387	10	3.54308	28.1429	2	5	4	0	1	58.6	20.7625	1.6	0.566893	0
778	1	13	10	14	19	3	24	-3	4	5	-16	21	29	1	m	2	2	1	1	0	2	7	2	1.68	58.5	20.727	67	23.7387	8.5	3.01162	29	2	6	3	1	m	65	23.03	6.5	2.303	0
788	0	7	3	6	m	m	5	-4	3	m	m	m	24	1	0	2	2	1	0	1	m	m	2	1.58	m	m	50.5	20.2291	m	m	28.2857	2	0	1	0	0	41	16.4237	m	m	m
790	1	12	14	21	37	m	23	2	7	16	m	m	36	2	1	3	3	1	0	0	2	7	1	1.6	60	23.4375	66	25.7812	6	2.34375	29	2	0	3	0	0	60	23.4375	0	0	1
794	0	2	15	2	3	1	1	13	-13	1	-2	0	29	1	0	3	1	1	0	0	3	7	2	1.68	59	20.9042	70	24.8016	11	3.89739	28.4286	2	3	3	0	1	59	20.9042	0	0	1
795	0	8	12	10	12	5	7	4	-2	2	-7	2	26	1	1	3	3	1	0	0	3	8	2	1.68	57.5	20.3727	68.2	24.1638	10.7	3.7911	m	m	7	3	0	0	57.5	20.3727	0	0	1
797	0	4	10	6	11	m	14	6	-4	5	m	m	29	1	0	3	2	1	1	0	2	8	2	1.58	46	18.4265	54	21.6311	8	3.20461	28	2	0	3	0	1	48	19.2277	2	0.801154	0
798	0	13	7	5	m	m	6	-6	-2	m	m	m	30	1	0	2	2	1	0	0	2	7	1	1.64	47	17.4747	56	20.8209	9	3.34622	29	2	0	2	0	1	51	18.9619	4	1.48721	0
800	0	6	m	3	m	m	8	m	m	m	m	m	33	1	1	3	3	1	1	0	3	8	2	1.66	55	19.9594	65	23.5883	10	3.62897	29	m	m	m	1	0	61	22.1367	6	2.17738	0
801	0	8	3	9	9	4	6	-5	6	0	-5	2	35	1	1	3	2	1	1	0	2	7	1	1.61	57	21.9899	63	24.3046	6	2.31473	29.2857	2	2	1	0	1	55	21.2183	-2	-0.771575	1
802	1	13	10	14	19	3	24	-3	4	5	-16	21	29	1	m	2	2	1	1	0	2	7	2	1.68	58.5	20.727	67	23.7387	8.5	3.01162	29	2	6	3	1	m	65	23.03	6.5	2.303	0
803	1	9	13	6	m	m	17	4	-7	m	m	m	28	2	1	1	1	1	0	0	3	8	1	1.68	59	20.9042	68	24.093	9	3.18878	29	2	5	3	0	0	60	21.2585	1	0.354308	0
805	1	17	18	25	m	m	24	1	7	m	m	m	36	2	1	1	1	1	0	0	m	5	1	1.58	66.95	26.8186	73.5	29.4424	6.55	2.62378	30.1429	2	6	4	0	1	73	29.2421	6.05	2.42349	0
806	1	11	13	12	27	8	19	2	-1	15	-19	11	32	1	1	3	3	1	1	0	2	7	1	1.55	48.9	20.3538	58	24.1415	9.1	3.78772	27	2	4	3	0	0	50	20.8117	1.1	0.457856	0
807	0	8	4	0	m	m	10	-4	-4	m	m	m	29	2	1	3	2	1	0	0	1	5	1	1.6	46.8	18.2812	56	21.875	9.2	3.59375	m	2	0	1	1	1	53	20.7031	6.2	2.42188	0
808	0	3	6	13	11	6	5	3	7	-2	-5	-1	29	1	1	3	2	1	1	0	2	7	2	1.68	51	18.0697	60	21.2585	9	3.18878	29.7143	2	4	2	0	1	51	18.0697	0	0	1
809	0	12	m	3	m	m	5	m	m	m	m	m	29	2	0	1	2	1	1	0	3	8	1	1.6	51.55	20.1367	m	m	m	m	29	m	m	m	0	0	51	19.9219	-0.55	-0.214844	1
810	0	17	9	9	4	6	14	-8	0	-5	2	8	23	1	0	1	2	1	1	0	2	8	1	1.65	63	23.1405	m	m	m	m	29.4286	1	2	2	0	0	70	25.7117	7	2.57117	0
811	1	17	16	7	8	8	28	-1	-9	1	0	20	29	1	1	3	2	1	1	0	m	6	2	1.68	58.7	20.7979	65	23.03	6.3	2.23214	29.2857	2	0	4	1	0	65	23.03	6.3	2.23214	0
812	1	5	21	16	8	1	22	16	-5	-8	-7	21	32	1	1	3	3	1	1	0	2	7	2	1.64	m	m	69	25.6544	m	m	28.5714	2	5	4	1	0	68	25.2826	m	m	m
813	0	19	m	15	m	m	17	m	m	m	m	m	29	1	1	3	1	1	1	0	3	6	2	1.65	53	19.4674	63	23.1405	10	3.67309	30	m	m	m	0	1	55	20.202	2	0.734619	0
815	0	6	7	10	m	m	10	1	3	m	m	m	28	1	1	3	2	1	1	0	2	8	2	1.6	73.3	28.6328	76.6	29.9219	3.3	1.28906	29	2	0	2	0	1	70	27.3438	-3.3	-1.28906	1
818	0	13	5	5	2	6	14	-8	0	-3	4	8	28	1	1	3	1	1	m	0	2	6	2	1.63	61.3	23.072	69	25.9701	7.7	2.89811	m	2	0	2	0	1	57.5	21.6418	-3.8	-1.43024	1
819	1	13	m	4	m	m	22	m	m	m	m	m	29	1	1	2	2	1	1	1	2	8	1	1.62	63	24.0055	71	27.0538	8	3.04832	29	m	m	m	0	1	65	24.7676	2	0.762079	0
820	0	9	7	m	m	m	13	-2	m	m	m	m	25	2	0	2	2	1	0	0	2	8	1	1.75	52.8	17.2408	62	20.2449	9.2	3.00408	28.7143	2	0	2	0	0	51.5	16.8163	-1.3	-0.42449	1
821	0	11	8	6	m	m	0	-3	-2	m	m	m	29	2	1	3	2	1	0	0	2	7	2	1.64	53	19.7055	61.5	22.8659	8.5	3.16032	28.4286	2	2	2	0	1	m	m	m	m	m
822	0	11	4	4	m	m	0	-7	0	m	m	m	24	1	1	3	2	1	1	0	2	7	2	1.66	66	23.9512	75	27.2173	9	3.26608	29	2	0	1	0	1	70	25.4028	4	1.45159	0
823	1	12	15	10	1	14	22	3	-5	-9	13	8	35	2	1	3	3	1	0	0	2	8	2	1.63	67	25.2174	74	27.852	7	2.63465	27	2	0	3	0	0	62.5	23.5237	-4.5	-1.6937	1
827	1	12	21	12	m	m	30	9	-9	m	m	m	28	1	m	3	m	m	1	0	3	7	1	1.5	44	19.5556	54	24	10	4.44444	28	2	3	4	0	1	45.5	20.2222	1.5	0.666667	0
830	0	8	1	7	m	m	12	-7	6	m	m	m	38	1	1	3	3	1	1	1	2	6	2	1.64	53	19.7055	63	23.4236	10	3.71802	29	2	3	1	0	0	50	18.5901	-3	-1.11541	1
831	0	6	4	6	m	m	13	-2	2	m	m	m	36	1	1	3	3	1	1	1	2	7	2	1.58	50	20.0288	61.3	24.5554	11.3	4.52652	29.7143	2	0	1	0	1	56	22.4323	6	2.40346	0
835	0	4	4	7	4	4	0	0	3	-3	0	-4	29	1	1	3	2	1	0	0	3	8	1	1.64	55	20.4491	70	26.0262	15	5.57704	30.2857	2	2	1	0	1	56	20.8209	1	0.371802	0
838	0	6	12	9	m	m	1	6	-3	m	m	m	26	1	1	3	3	1	0	0	2	8	1	1.6	46	17.9688	58.5	22.8516	12.5	4.88281	28.5714	2	0	3	0	1	49	19.1406	3	1.17188	0
839	0	7	m	9	m	m	10	m	m	m	m	m	38	2	1	3	2	1	0	0	2	7	1	1.7	71	24.5675	80	27.6817	9	3.11419	28.7143	2	3	m	0	0	70	24.2215	-1	-0.346021	1
840	0	17	13	19	4	9	7	-4	6	-15	5	-2	30	1	1	3	2	1	1	0	2	7	1	1.66	54	19.5965	62	22.4996	8	2.90318	27.8571	1	6	3	1	1	57	20.6852	3	1.08869	0
841	0	17	20	7	m	m	6	3	-13	m	m	m	25	1	1	2	2	1	0	0	3	7	1	1.64	52	19.3337	65	24.1672	13	4.83343	29.7143	2	0	4	0	1	55	20.4491	3	1.11541	0
842	0	5	6	13	17	20	m	1	7	4	3	m	28	1	1	3	2	1	1	0	2	8	m	1.58	65	26.0375	72	28.8415	7	2.80404	29	2	3	2	m	m	m	m	m	m	m
843	0	10	14	5	6	3	7	4	-9	1	-3	4	31	1	1	2	2	1	1	0	3	7	1	1.6	55.4	21.6406	64.65	25.2539	9.25	3.61328	29.2857	1	0	3	0	1	60	23.4375	4.6	1.79688	0
844	0	11	9	9	m	m	1	-2	0	m	m	m	31	2	1	2	1	1	0	0	2	6	2	1.6	58	22.6562	64	25	6	2.34375	29.4286	2	6	2	0	1	65	25.3906	7	2.73438	0
845	0	36	16	11	m	m	6	-20	-5	m	m	m	30	1	1	3	2	1	0	0	2	8	1	1.63	50	18.8189	62	23.3355	12	4.51654	29.2857	2	3	4	0	1	51.5	19.3835	1.5	0.564568	0
846	0	8	4	6	m	m	7	-4	2	m	m	m	28	1	1	3	2	1	1	0	3	7	2	1.65	57	20.9366	64	23.5078	7	2.57117	29.4286	2	0	1	0	0	62.5	22.9568	5.5	2.0202	0
847	1	13	11	2	20	5	21	-2	-9	18	-15	16	27	1	1	2	1	1	0	0	3	8	1	1.66	52	18.8707	60	21.7738	8	2.90318	29.2857	2	0	3	1	0	55	19.9594	3	1.08869	0
848	0	8	m	m	6	2	3	m	m	m	-4	1	30	2	1	3	3	1	1	1	2	6	2	1.64	58	21.5645	65	24.1672	7	2.60262	28.5714	m	m	m	0	1	60	22.3081	2	0.743605	0
849	0	8	18	11	4	m	11	10	-7	-7	m	m	28	1	1	3	3	1	0	0	2	7	2	1.67	61	21.8724	75	26.8923	14	5.0199	29.8571	2	8	4	0	0	58	20.7967	-3	-1.07569	1
851	0	8	11	10	m	m	14	3	-1	m	m	m	37	1	1	3	2	1	1	0	3	8	2	1.5	44	19.5556	53	23.5556	9	4	30.4286	2	6	3	1	0	44.5	19.7778	0.5	0.222222	0
854	0	8	0	3	m	m	6	-8	3	m	m	m	34	1	1	3	2	1	1	0	1	8	2	1.78	66	20.8307	81.6	25.7543	15.6	4.92362	29.8571	2	0	1	0	1	50	15.7808	-16	-5.04987	1
855	0	1	1	3	m	m	2	0	2	m	m	m	29	1	1	1	1	1	1	0	2	10	1	1.61	50	19.2894	56	21.6041	6	2.31473	29.5714	2	2	1	0	1	50	19.2894	0	0	1
856	0	2	m	9	m	m	4	m	m	m	m	m	27	2	1	2	2	1	0	1	3	10	2	1.58	44	17.6254	57	22.8329	13	5.2075	29.4286	m	m	m	0	1	48	19.2277	4	1.60231	0
857	0	2	5	5	11	6	5	3	0	6	-5	-1	29	1	1	3	2	1	1	0	2	10	1	1.58	38.9	15.5824	50	20.0288	11.1	4.4464	29	2	2	2	0	1	57	22.8329	18.1	7.25044	0
858	0	5	2	1	m	m	9	-3	-1	m	m	m	32	1	1	3	2	1	1	0	2	9	1	1.61	50.2	19.3665	64.2	24.7676	14	5.40103	29	1	5	1	1	1	53	20.4467	2.8	1.08021	0
861	0	2	2	3	11	14	9	0	1	8	3	-5	32	1	1	3	2	1	1	0	3	9	1	1.62	54	20.5761	65	24.7676	11	4.19143	29	2	2	1	0	1	50	19.052	-4	-1.52416	1
862	0	14	14	19	11	3	1	0	5	-8	-8	-2	26	1	0	2	2	1	1	1	2	7	2	1.73	54	18.0427	65	21.7181	11	3.67537	30.7143	2	2	3	0	0	55	18.3768	1	0.334124	0
864	0	5	10	1	0	m	m	5	-9	-1	m	m	26	1	1	3	2	1	0	0	3	7	1	1.68	57	20.1956	66.7	23.6324	9.7	3.43679	28	2	0	3	m	m	m	m	m	m	m
865	0	24	m	20	m	m	5	m	m	m	m	m	28	2	1	3	2	2	1	0	2	7	1	1.6	48	18.75	59	23.0469	11	4.29688	29.5714	m	m	m	0	1	54	21.0938	6	2.34375	0
866	0	11	14	2	m	m	6	3	-12	m	m	m	30	1	1	2	1	1	1	0	1	7	1	1.58	70	28.0404	80	32.0461	10	4.00577	29	2	0	3	0	1	53	21.2306	-17	-6.80981	1
867	0	3	1	1	m	m	3	-2	0	m	m	m	26	2	1	3	3	1	0	1	3	10	2	1.65	65	23.8751	76	27.9155	11	4.0404	29.1429	2	0	1	0	1	50	18.3655	-15	-5.50964	1
869	0	12	3	5	m	m	7	-9	2	m	m	m	36	2	1	3	3	1	1	1	3	8	1	1.61	44	16.9747	52.6	20.2924	8.6	3.31777	28	1	2	1	0	1	50	19.2894	6	2.31473	0
870	0	14	4	8	m	m	3	-10	4	m	m	m	27	1	1	3	2	1	1	0	2	7	1	1.66	47	17.0562	57	20.6852	10	3.62897	29.5714	2	0	1	0	1	53	19.2336	6	2.17738	0
872	0	4	0	4	4	2	m	-4	4	0	-2	m	31	1	1	3	3	1	1	0	2	10	m	1.66	75	27.2173	84	30.4834	9	3.26608	28.4286	2	0	1	m	m	m	m	m	m	m
873	0	19	27	7	10	20	17	8	-20	3	10	-3	31	1	1	3	2	1	0	0	2	7	2	1.58	44	17.6254	53	21.2306	9	3.60519	28.7143	2	7	4	1	0	52	20.83	8	3.20461	0
875	0	4	0	3	6	1	0	-4	3	3	-5	-1	32	1	0	2	2	1	1	1	1	9	m	1.68	58	20.5499	70	24.8016	12	4.2517	28.2857	2	0	1	0	1	48	17.0068	-10	-3.54308	1
876	0	0	0	0	8	2	m	0	0	8	-6	m	28	1	1	3	2	1	1	0	2	8	1	1.65	60	22.0386	68	24.977	8	2.93848	27.7143	2	0	1	m	m	m	m	m	m	m
878	0	19	5	2	m	m	2	-14	-3	m	m	m	30	1	1	3	3	1	1	1	2	5	2	1.58	54.5	21.8314	62	24.8358	7.5	3.00433	29.8571	1	3	2	0	1	52	20.83	-2.5	-1.00144	1
880	0	11	m	16	m	m	2	m	m	m	m	m	26	1	1	3	2	1	1	0	2	8	m	1.63	47	17.6898	55.5	20.889	8.5	3.19922	29	m	m	m	0	1	51	19.1953	4	1.50551	0
881	0	11	12	13	3	10	7	1	1	-10	7	-3	33	2	1	3	2	1	1	0	2	8	2	1.52	47	20.3428	55	23.8054	8	3.4626	28.4286	1	0	3	0	1	53	22.9398	6	2.59695	0
882	0	13	6	10	m	m	4	-7	4	m	m	m	33	2	1	2	1	1	1	0	3	9	1	1.63	65	24.4646	79	29.7339	14	5.2693	29.4286	2	0	2	0	1	54	20.3244	-11	-4.14016	1
883	0	6	7	3	14	m	8	1	-4	11	m	m	27	1	1	1	1	1	1	0	1	7	1	1.6	58	22.6562	65.85	25.7227	7.85	3.06641	28.8571	2	6	2	0	1	47	18.3594	-11	-4.29688	1
885	0	15	1	11	m	m	3	-14	10	m	m	m	24	1	1	3	2	1	0	0	2	7	2	1.62	50	19.052	59	22.4813	9	3.42936	29	2	0	1	0	1	53	20.1951	3	1.14312	0
886	0	17	13	19	4	9	7	-4	6	-15	5	-2	30	1	1	3	2	1	1	0	2	7	1	1.66	54	19.5965	62	22.4996	8	2.90318	27.8571	1	6	3	1	1	57	20.6852	3	1.08869	0
887	0	4	1	3	5	0	4	-3	2	2	-5	4	30	1	0	3	m	1	1	0	3	8	1	1.65	48	17.6309	56	20.5693	8	2.93848	27.8571	2	0	1	0	1	54	19.8347	6	2.20386	0
888	0	12	1	6	7	2	3	-11	5	1	-5	1	29	1	1	3	3	1	1	0	2	7	1	1.55	57.4	23.8918	69.8	29.0531	12.4	5.16129	27.5714	2	2	1	0	1	54	22.4766	-3.4	-1.41519	1
889	1	17	23	10	19	37	34	6	-13	9	18	-3	27	1	1	3	3	1	1	0	2	6	1	1.6	48.9	19.1016	58.5	22.8516	9.6	3.75	29.2857	1	3	4	0	0	57	22.2656	8.1	3.16406	0
890	0	5	5	1	m	m	4	0	-4	m	m	m	26	1	1	3	2	1	1	0	2	8	m	1.66	56	20.3223	62	22.4996	6	2.17738	29.1429	2	0	2	0	1	49	17.782	-7	-2.54028	1
891	0	3	4	8	m	m	4	1	4	m	m	m	34	1	1	3	3	1	1	0	3	9	2	1.6	64	25	76	29.6875	12	4.6875	29.1429	2	2	1	0	1	52	20.3125	-12	-4.6875	1
895	0	10	19	2	8	m	7	9	-17	6	m	m	22	1	0	1	1	1	1	0	1	8	1	1.6	49	19.1406	55	21.4844	6	2.34375	29.8571	1	4	4	0	1	50	19.5312	1	0.390625	0
898	0	5	12	11	16	m	6	7	-1	5	m	m	36	2	1	3	2	1	1	1	3	9	1	1.62	55	20.9572	65	24.7676	10	3.81039	29.5714	2	2	3	0	1	55	20.9572	0	0	1
901	0	m	9	3	1	m	3	m	-6	-2	m	m	m	m	m	m	m	m	m	m	m	m	m	m	m	m	m	m	m	m	m	1	0	2	0	1	56	m	m	m	m
902	0	0	0	2	m	m	4	0	2	m	m	m	28	1	1	2	1	1	1	0	2	9	1	1.65	60	22.0386	69	25.3444	9	3.30579	29.1429	2	0	1	1	1	54	19.8347	-6	-2.20386	1
903	1	13	10	14	19	3	24	-3	4	5	-16	21	29	1	m	2	2	1	1	0	2	7	2	1.68	58.5	20.727	67	23.7387	8.5	3.01162	29	2	6	3	1	m	65	23.03	6.5	2.303	0
904	0	4	4	2	3	16	m	0	-2	1	13	m	29	1	1	3	2	1	0	0	2	9	1	1.63	48	18.0662	62	23.3355	14	5.2693	28.1429	2	0	1	m	m	m	m	m	m	m
906	0	5	7	4	m	m	7	2	-3	m	m	m	28	1	1	3	2	1	1	1	3	7	2	1.7	52	17.9931	60	20.7612	8	2.76817	28.2857	2	0	2	1	1	50	17.301	-2	-0.692042	1
907	1	6	6	5	35	18	25	0	-1	30	-17	7	31	1	1	3	3	1	1	1	3	8	2	1.6	58.5	22.8516	70.5	27.5391	12	4.6875	29.2857	1	1	2	0	1	66.5	25.9766	8	3.125	0
908	1	6	6	5	35	18	25	0	-1	30	-17	7	31	1	1	3	3	1	1	1	3	8	2	1.6	58.5	22.8516	70.5	27.5391	12	4.6875	29.2857	1	1	2	0	1	66.5	25.9766	8	3.125	0
909	0	5	6	13	16	m	14	1	7	3	m	m	27	1	1	3	2	1	1	1	2	7	2	1.63	70	26.3465	80	30.1103	10	3.76378	28.8571	2	2	2	1	0	72.5	27.2874	2.5	0.940946	0
911	0	12	8	5	1	m	m	-4	-3	-4	m	m	32	2	1	3	2	1	1	0	2	9	2	1.6	55	21.4844	67.5	26.3672	12.5	4.88281	27.5714	2	2	2	m	m	m	m	m	m	m
912	0	19	18	6	m	m	4	-1	-12	m	m	m	27	2	0	3	3	1	0	1	2	5	2	1.64	58	21.5645	66	24.539	8	2.97442	29.2857	2	0	4	1	1	52	19.3337	-6	-2.23081	1
914	0	15	27	13	12	m	9	12	-14	-1	m	m	37	2	1	3	3	1	0	0	1	5	1	1.61	50	19.2894	63	24.3046	13	5.01524	29	2	8	4	1	1	49	18.9036	-1	-0.385788	1
915	0	10	6	10	m	m	1	-4	4	m	m	m	38	2	1	3	3	1	1	1	3	8	1	1.65	50	18.3655	67.6	24.8301	17.6	6.46465	28.2857	2	3	2	0	1	54	19.8347	4	1.46924	0
916	0	3	17	2	6	2	7	14	-15	4	-4	5	35	1	1	3	3	1	0	0	2	7	1	1.65	59.5	21.8549	65	23.8751	5.5	2.0202	28.2857	2	6	4	0	1	60	22.0386	0.5	0.183655	0
919	0	22	m	m	4	19	m	m	m	m	15	m	29	1	1	3	3	1	1	0	2	7	1	1.68	51	18.0697	63	22.3214	12	4.2517	28.8571	m	m	m	m	m	m	m	m	m	m
920	0	3	4	7	24	4	6	1	3	17	-20	2	30	1	1	3	3	1	1	0	2	7	1	1.59	42.7	16.8902	49.8	19.6986	7.1	2.80843	27.7143	2	2	1	1	1	48	18.9866	5.3	2.09644	0
921	0	4	4	5	m	m	1	0	1	m	m	m	27	1	1	3	2	1	1	0	3	10	2	1.53	44	18.7962	49.5	21.1457	5.5	2.34952	28.7143	2	2	1	0	1	50	21.3593	6	2.56312	0
923	0	9	6	8	m	m	3	-3	2	m	m	m	36	1	1	3	3	1	1	1	1	8	1	1.63	61	22.9591	71	26.7229	10	3.76378	29	2	0	2	0	1	62	23.3355	1	0.376378	0
924	0	14	14	19	11	3	1	0	5	-8	-8	-2	26	1	0	2	2	1	1	1	2	7	2	1.73	54	18.0427	65	21.7181	11	3.67537	30.7143	2	2	3	0	0	55	18.3768	1	0.334124	0
926	0	3	2	4	9	4	5	-1	2	5	-5	1	30	1	1	3	3	1	1	0	2	9	1	1.63	54	20.3244	64	24.0882	10	3.76378	28.7143	2	0	1	0	1	55	20.7008	1	0.376378	0
927	0	m	2	2	7	3	3	m	0	5	-4	0	26	1	0	2	2	1	1	0	2	8	1	1.63	55	20.7008	68	25.5937	13	4.89292	27.5714	1	0	1	0	1	57	21.4536	2	0.752757	0
928	0	13	15	10	19	3	m	2	-5	9	-16	m	32	2	1	3	3	1	1	0	1	7	2	1.6	48	18.75	58	22.6562	10	3.90625	29.5714	2	0	3	m	m	m	m	m	m	m
932	0	4	4	7	4	4	0	0	3	-3	0	-4	29	1	1	3	2	1	0	0	3	8	1	1.64	55	20.4491	70	26.0262	15	5.57704	30.2857	2	2	1	0	1	56	20.8209	1	0.371802	0
933	0	10	12	6	12	4	m	2	-6	6	-8	m	29	1	1	3	3	1	1	0	2	9	2	1.63	59	22.2063	63.35	23.8436	4.35	1.63725	29.4286	2	0	3	m	m	m	m	m	m	m
936	0	9	10	11	19	5	m	1	1	8	-14	m	30	1	1	3	2	1	1	0	1	5	2	1.64	58	21.5645	67	24.9108	9	3.34622	27.2857	2	0	3	m	m	m	m	m	m	m
938	0	3	3	2	m	m	7	0	-1	m	m	m	32	1	1	3	3	1	0	1	3	8	1	1.58	48	19.2277	61	24.4352	13	5.2075	29.7143	2	1	1	1	0	50	20.0288	2	0.801154	0
939	0	6	10	0	10	2	2	4	-10	10	-8	0	38	2	1	2	3	1	0	0	1	6	1	1.71	68	23.255	74	25.3069	6	2.05191	29	2	0	3	0	0	69	23.597	1	0.341986	0
940	0	9	m	m	22	8	m	m	m	m	-14	m	27	2	m	3	3	1	1	1	3	10	m	1.6	70	27.3438	76	29.6875	6	2.34375	28.7143	m	m	m	m	m	m	m	m	m	m
941	0	9	2	4	m	8	m	-7	2	m	m	m	35	1	1	3	3	1	0	0	3	8	1	1.61	52	20.061	59	22.7615	7	2.70051	29	2	0	1	m	m	m	m	m	m	m
943	0	3	1	6	9	m	3	-2	5	3	m	m	29	1	1	3	1	1	1	0	2	6	2	1.75	65.5	21.3878	74.5	24.3265	9	2.93878	29	2	0	1	0	1	68.5	22.3673	3	0.979592	0
944	0	12	25	21	13	9	0	13	-4	-8	-4	-9	28	1	1	3	3	1	1	0	2	5	1	1.68	55	19.487	67	23.7387	12	4.2517	30.5714	2	5	4	0	0	55	19.487	0	0	1
945	0	6	1	4	2	0	m	-5	3	-2	-2	m	30	1	1	3	3	1	0	0	2	7	1	1.65	75	27.5482	83	30.4867	8	2.93848	29	2	0	1	m	m	m	m	m	m	m
946	0	2	6	5	8	8	9	4	-1	3	0	1	30	1	1	3	2	1	0	0	2	8	1	1.68	52	18.424	66	23.3844	14	4.96032	29.7143	2	2	2	0	1	55	19.487	3	1.06293	0
947	0	10	m	m	3	m	m	m	m	m	m	m	34	1	1	3	2	1	1	1	3	9	m	1.6	55	21.4844	62.5	24.4141	7.5	2.92969	29.1429	m	m	m	m	m	m	m	m	m	m
950	0	17	m	m	7	22	m	m	m	m	15	m	23	1	0	3	2	1	1	0	2	8	2	1.62	44	16.7657	49.7	18.9377	5.7	2.17193	29.4286	m	m	m	m	m	m	m	m	m	m
951	0	1	2	4	6	m	1	1	2	2	m	m	28	1	1	3	1	1	1	1	2	8	1	1.59	61.9	24.4848	67.9	26.8581	6	2.37332	28.4286	1	5	1	0	0	55	21.7555	-6.9	-2.72932	1
952	0	20	15	7	6	14	18	-5	-8	-1	8	4	29	1	1	3	3	1	0	0	2	8	2	1.61	64	24.6904	72.5	27.9696	8.5	3.27919	30.8571	1	5	3	1	1	70	27.0051	6	2.31473	0
953	0	11	9	19	16	1	5	-2	10	-3	-15	4	26	1	1	3	3	1	1	0	2	6	1	1.62	67	25.5296	81	30.8642	14	5.33455	29.2857	2	3	2	0	0	66	25.1486	-1	-0.381039	1
956	0	13	12	18	16	5	m	-1	6	-2	-11	m	27	1	1	3	3	1	1	0	2	8	2	1.64	47	17.4747	54	20.0773	7	2.60262	28.7143	2	0	3	m	m	m	m	m	m	m
957	0	8	11	19	22	5	m	3	8	3	-17	m	34	2	1	3	3	1	1	1	3	7	2	1.61	51	19.6752	66	25.462	15	5.78681	29.1429	2	4	3	m	m	m	m	m	m	m
958	0	1	4	7	13	9	9	3	3	6	-4	0	36	1	1	3	2	1	1	0	2	10	2	1.6	50	19.5312	60	23.4375	10	3.90625	29	2	2	1	1	0	50	19.5312	0	0	1
960	1	16	6	9	12	21	17	-10	3	3	9	-4	28	1	1	3	3	1	1	0	1	5	2	1.65	61	22.4059	72	26.4463	11	4.0404	29.7143	2	0	2	1	0	60	22.0386	-1	-0.367309	1
961	0	9	16	16	17	24	11	7	0	1	7	-13	29	1	1	3	2	1	1	1	2	7	1	1.62	44.35	16.8991	55.75	21.243	11.4	4.34385	29.8571	2	3	4	1	1	43.5	16.5752	-0.85	-0.323884	1
962	0	7	m	4	5	2	3	m	m	1	-3	1	26	1	1	3	2	1	0	1	2	7	1	1.65	62	22.7732	77	28.2828	15	5.50964	29.2857	m	m	m	1	1	m	m	m	m	m
963	0	15	6	7	m	m	8	-9	1	m	m	m	34	1	1	2	2	1	0	0	2	7	1	1.6	56	21.875	70	27.3438	14	5.46875	28.5714	2	2	2	0	1	63	24.6094	7	2.73438	0
965	0	15	12	6	29	5	6	-3	-6	23	-24	1	30	1	0	3	2	1	0	0	2	9	m	1.6	50	19.5312	60	23.4375	10	3.90625	27.2857	2	3	3	0	1	55	21.4844	5	1.95312	0
967	0	5	3	2	20	5	2	-2	-1	18	-15	-3	32	1	1	2	2	2	1	0	3	8	2	1.62	57.2	21.7955	67.7	25.7964	10.5	4.00091	28	2	0	1	0	0	61	23.2434	3.8	1.44795	0
970	0	12	12	5	18	m	3	0	-7	13	m	m	28	1	1	2	2	1	1	0	2	7	1	1.62	45	17.1468	57	21.7193	12	4.57247	29.1429	1	10	3	0	1	47	17.9089	2	0.762079	0
971	0	7	3	6	8	m	4	-4	3	2	m	m	35	1	1	3	2	1	1	0	2	7	2	1.7	62	21.4533	70	24.2215	8	2.76817	29.1429	2	1	1	1	0	62	21.4533	0	0	1
973	0	12	12	8	4	8	10	0	-4	-4	4	2	28	1	0	3	2	1	1	0	2	6	1	1.65	51.6	18.9532	64	23.5078	12.4	4.55464	28.4286	2	5	3	0	1	48	17.6309	-3.6	-1.32231	1
974	0	12	13	0	2	0	0	1	-13	2	-2	0	32	1	1	3	2	1	0	0	2	7	1	1.65	53	19.4674	60	22.0386	7	2.57117	30.2857	2	4	3	0	0	50	18.3655	-3	-1.10193	1
975	0	11	9	1	8	m	4	-2	-8	7	m	m	28	2	1	3	2	1	0	0	2	8	2	1.63	51	19.1953	60	22.5827	9	3.38741	27.2857	2	0	2	0	0	m	m	m	m	m
976	0	8	1	14	27	6	m	-7	13	13	-21	m	29	1	1	3	3	1	0	0	3	8	1	1.64	50	18.5901	58	21.5645	8	2.97442	29.4286	2	0	1	m	m	m	m	m	m	m
977	0	6	0	3	6	5	4	-6	3	3	-1	-1	30	1	1	3	2	1	0	0	2	7	1	1.6	60	23.4375	67	26.1719	7	2.73438	28.4286	1	2	1	0	0	52	20.3125	-8	-3.125	1
980	0	8	m	3	m	m	3	m	m	m	m	m	24	1	1	2	1	1	1	0	2	7	1	1.62	55	20.9572	63	24.0055	8	3.04832	29.5714	m	m	m	1	1	60	22.8624	5	1.9052	0
985	0	7	10	10	m	m	1	3	0	m	m	m	33	1	1	3	3	1	1	0	2	7	1	1.6	68.74	26.8516	m	m	m	m	28.4286	2	0	3	0	1	m	m	m	m	m
988	1	11	13	12	27	8	19	2	-1	15	-19	11	32	1	1	3	3	1	1	0	2	7	1	1.55	48.9	20.3538	58	24.1415	9.1	3.78772	27	2	4	3	0	0	50	20.8117	1.1	0.457856	0
989	0	6	10	0	10	2	2	4	-10	10	-8	0	38	2	1	2	3	1	0	0	1	6	1	1.71	68	23.255	74	25.3069	6	2.05191	29	2	0	3	0	0	69	23.597	1	0.341986	0
991	0	10	10	11	10	m	6	0	1	-1	m	m	28	1	1	3	3	1	1	1	2	9	2	1.68	62	21.9671	70	24.8016	8	2.83447	28.8571	2	0	3	0	1	65	23.03	3	1.06293	0
992	0	7	2	3	10	5	m	-5	1	7	-5	m	28	1	1	2	1	1	1	0	1	7	1	1.63	70	26.3465	80	30.1103	10	3.76378	28.1429	2	0	1	m	m	m	m	m	m	m
995	0	4	m	5	m	m	1	m	m	m	m	m	22	1	1	1	3	1	1	1	2	9	1	1.6	44.54	17.3984	m	m	m	m	28.8571	m	m	m	1	0	50	19.5312	5.46	2.13281	0
996	0	7	2	0	3	1	8	-5	-2	3	-2	7	26	1	1	2	1	1	0	1	2	8	1	1.58	67	26.8386	77	30.8444	10	4.00577	28.5714	2	0	1	0	1	m	m	m	m	m
997	0	5	7	11	12	7	7	2	4	1	-5	0	31	2	0	3	2	1	0	0	2	8	1	1.55	56.2	23.3923	63	26.2227	6.8	2.83039	29.7143	2	3	2	0	0	55	22.8928	-1.2	-0.49948	1
998	0	6	1	2	15	6	2	-5	1	13	-9	-4	28	1	1	3	2	1	1	0	2	7	1	1.68	46	16.2982	55	19.487	9	3.18878	28.4286	2	0	1	0	1	52	18.424	6	2.12585	0
999	0	5	0	5	m	m	6	-5	5	m	m	m	30	1	0	3	3	1	1	0	2	7	1	1.65	53	19.4674	69.5	25.528	16.5	6.06061	30.7143	2	0	1	1	0	m	m	m	m	m
1002	0	1	1	6	7	m	7	0	5	1	m	m	32	2	1	3	3	1	1	1	2	9	1	1.58	43	17.2248	51	20.4294	8	3.20461	29	1	0	1	0	1	46	18.4265	3	1.20173	0
1004	0	11	5	13	13	4	6	-6	8	0	-9	2	32	2	0	3	2	1	1	1	1	6	2	1.66	56.5	20.5037	72	26.1286	15.5	5.62491	28.8571	2	8	2	0	1	60	21.7738	3.5	1.27014	0
1005	0	8	6	8	m	m	9	-2	2	m	m	m	28	1	1	2	2	1	1	0	2	8	2	1.55	55	22.8928	64	26.6389	9	3.7461	29.1429	2	0	2	0	0	50	20.8117	-5	-2.08117	1
1007	0	7	6	4	15	18	m	-1	-2	11	3	m	31	1	1	3	3	1	0	0	2	9	m	1.75	55	17.9592	67.5	22.0408	12.5	4.08163	27	2	5	2	m	m	m	m	m	m	m
1008	0	17	29	27	m	m	13	12	-2	m	m	m	38	2	1	3	3	1	1	1	2	5	1	1.55	53	22.0604	64	26.6389	11	4.57856	28.1429	2	m	4	0	1	50	20.8117	-3	-1.2487	1
1009	0	5	4	6	9	29	4	-1	2	3	20	-25	28	1	1	3	2	1	1	0	2	7	2	1.65	50	18.3655	59	21.6713	9	3.30579	29.8571	2	5	1	0	1	50	18.3655	0	0	1
1010	0	7	0	2	17	m	6	-7	2	15	m	m	26	1	0	1	1	1	0	0	2	7	1	1.63	57	21.4536	75	28.2284	18	6.77481	29	2	0	1	1	0	m	m	m	m	m
1013	0	5	3	5	m	m	7	-2	2	m	m	m	29	1	1	3	2	1	1	0	2	7	2	1.54	41.65	17.562	49.5	20.872	7.85	3.31	29.7143	2	0	1	0	1	49	20.6612	7.35	3.09917	0
1014	0	3	6	2	11	8	1	3	-4	9	-3	-7	33	2	1	3	3	1	0	1	2	8	2	1.65	51	18.7328	62	22.7732	11	4.0404	29.1429	2	0	2	0	0	55	20.202	4	1.46924	0
1017	0	6	5	4	m	m	9	-1	-1	m	m	m	28	1	1	3	2	1	1	0	2	8	2	1.65	54	19.8347	65	23.8751	11	4.0404	29.5714	2	0	2	0	0	56	20.5693	2	0.734619	0
1018	0	8	4	6	12	6	9	-4	2	6	-6	3	33	1	1	3	2	1	1	0	2	8	2	1.58	53.75	21.531	64	25.6369	10.25	4.10591	28.4286	2	2	1	0	0	53.5	21.4309	-0.25	-0.100144	1
1019	1	13	11	2	20	5	21	-2	-9	18	-15	16	27	1	1	2	1	1	0	0	3	8	1	1.66	52	18.8707	60	21.7738	8	2.90318	29.2857	2	0	3	1	0	55	19.9594	3	1.08869	0
1021	0	8	2	7	0	10	1	-6	5	-7	10	-9	26	1	1	3	2	1	0	1	2	7	1	1.63	53.2	20.0233	65	24.4646	11.8	4.44127	30.2857	2	0	1	0	0	55	20.7008	1.8	0.677481	0
1023	0	13	6	15	25	12	4	-7	9	10	-13	-8	31	1	1	3	2	1	0	0	2	7	1	1.65	53	19.4674	63.5	23.3242	10.5	3.85675	29.4286	2	4	2	1	m	61.5	22.5895	8.5	3.12213	0
1026	0	10	14	5	6	3	7	4	-9	1	-3	4	31	1	1	2	2	1	1	0	3	7	1	1.6	55.4	21.6406	64.65	25.2539	9.25	3.61328	29.2857	1	0	3	0	1	60	23.4375	4.6	1.79688	0
1027	0	3	3	5	m	m	5	0	2	m	m	m	28	1	1	3	2	1	1	0	2	8	2	1.56	51	20.9566	60	24.6548	9	3.69822	29	2	0	1	0	0	50	20.5457	-1	-0.410914	1
1028	1	27	18	3	m	m	23	-9	-15	m	m	m	30	1	1	2	2	1	1	0	2	7	2	1.6	48	18.75	54.5	21.2891	6.5	2.53906	27	2	3	4	0	0	49	19.1406	1	0.390625	0
1030	0	3	4	5	13	5	2	1	1	8	-8	-3	28	1	1	3	3	1	0	0	2	7	2	1.73	63	21.0498	77	25.7276	14	4.67774	28.8571	2	2	1	0	0	60	20.0474	-3	-1.00237	1
1033	0	23	19	14	m	m	8	-4	-5	m	m	m	34	1	1	3	3	1	0	0	2	5	1	1.63	56	21.0772	68	25.5937	12	4.51654	29.7143	2	6	4	0	1	60	22.5827	4	1.50551	0
1034	0	7	11	10	7	m	1	4	-1	-3	m	m	32	1	1	2	3	1	1	0	3	8	1	1.6	52.3	20.4297	60.3	23.5547	8	3.125	29.4286	2	3	3	0	1	m	m	m	m	m
1035	0	3	m	7	m	m	4	m	m	m	m	m	29	1	1	3	2	1	1	1	2	7	2	1.65	63	23.1405	74	27.1809	11	4.0404	29.5714	2	5	m	0	0	67.8	24.9036	4.8	1.76309	0
1037	1	11	13	12	27	8	19	2	-1	15	-19	11	32	1	1	3	3	1	1	0	2	7	1	1.55	48.9	20.3538	58	24.1415	9.1	3.78772	27	2	4	3	0	0	50	20.8117	1.1	0.457856	0
1040	0	6	1	2	15	6	2	-5	1	13	-9	-4	28	1	1	3	2	1	1	0	2	7	1	1.68	46	16.2982	55	19.487	9	3.18878	28.4286	2	0	1	0	1	52	18.424	6	2.12585	0
1050	0	11	16	9	3	13	16	5	-7	-6	10	3	26	1	1	3	3	1	0	0	2	10	1	1.66	88	31.935	94	34.1124	6	2.17738	31	2	6	4	0	1	82.5	29.939	-5.5	-1.99594	1
1052	0	2	6	5	8	8	9	4	-1	3	0	1	30	1	1	3	2	1	0	0	2	8	1	1.69	52	18.2066	66	23.1084	14	4.90179	29.7143	2	2	2	0	1	55	19.257	3	1.05038	0
1053	0	11	4	5	7	m	7	-7	1	2	m	m	33	2	1	3	3	1	0	0	1	9	1	1.63	51	19.1953	63	23.7118	12	4.51654	29.7143	2	2	1	0	1	54	20.3244	3	1.12914	0
1054	0	13	11	17	14	4	m	-2	6	-3	-10	m	31	1	1	3	2	1	1	0	2	8	1	1.61	68	26.2336	77	29.7056	9	3.47209	29	1	0	3	m	m	m	m	m	m	m
1055	0	16	5	15	23	6	15	-11	10	8	-17	9	35	2	1	3	3	1	1	1	2	9	2	1.72	75	25.3515	89	30.0838	14	4.73229	28.4286	2	3	2	0	0	80	27.0416	5	1.6901	0
1056	0	8	5	14	19	2	m	-3	9	5	-17	m	31	1	1	3	3	1	1	0	2	8	1	1.7	54	18.6851	63	21.7993	9	3.11419	29.4286	2	0	2	m	m	m	m	m	m	m
1057	0	9	18	10	14	m	m	9	-8	4	m	m	32	1	1	3	3	1	0	0	2	6	m	1.59	55	21.7555	58	22.9421	3	1.18666	27.2857	2	2	4	m	m	m	m	m	m	m
1058	0	m	25	26	35	m	2	m	1	9	m	m	31	1	1	2	2	1	1	0	1	7	1	1.56	53	21.7784	60.7	24.9425	7.7	3.16404	29.2857	2	6	4	0	1	54	22.1893	1	0.410914	0
1060	1	0	1	18	m	m	21	1	17	m	m	m	32	2	1	3	3	1	1	0	2	6	2	1.6	50	19.5312	60.44	23.6094	10.44	4.07812	29.5714	m	0	1	0	1	54	21.0938	4	1.5625	0
1063	0	m	4	8	9	3	10	m	4	1	-6	7	28	1	1	2	2	1	0	0	2	8	2	1.61	55	21.2183	69	26.6193	14	5.40103	28	2	0	1	0	0	55	21.2183	0	0	1
1064	0	10	12	12	7	m	13	2	0	-5	m	m	31	1	1	2	1	1	1	0	2	10	1	1.61	60	23.1473	73.5	28.3554	13.5	5.20813	29.2857	1	7	3	0	0	57.5	22.1828	-2.5	-0.964469	1
1067	0	13	8	4	4	10	m	-5	-4	0	6	m	32	1	1	3	2	1	1	0	1	7	1	1.6	50	19.5312	62	24.2188	12	4.6875	29.8571	2	0	2	m	m	m	m	m	m	m
1068	0	7	8	11	10	14	m	1	3	-1	4	m	31	1	1	3	3	1	1	0	2	9	2	1.61	60	23.1473	67.5	26.0407	7.5	2.89341	28.8571	2	0	2	m	m	m	m	m	m	m
1071	0	12	3	6	8	3	9	-9	3	2	-5	6	28	2	0	3	2	1	0	0	3	6	1	1.62	63	24.0055	67.9	25.8726	4.9	1.86709	29	2	2	1	0	0	56.5	21.5287	-6.5	-2.47676	1
1072	0	12	7	8	1	2	10	-5	1	-7	1	8	35	2	1	3	2	1	1	0	2	8	2	1.67	61.5	22.0517	68.5	24.5617	7	2.50995	29.2857	2	0	2	0	1	64	22.9481	2.5	0.896411	0
1073	0	17	9	9	4	6	14	-8	0	-5	2	8	23	1	0	1	2	1	1	0	2	8	1	1.65	63	23.1405	m	m	m	m	29.4286	1	2	2	0	0	70	25.7117	7	2.57117	0
1074	0	7	9	11	11	5	8	2	2	0	-6	3	33	2	1	3	3	1	1	1	2	8	1	1.66	60	21.7738	67	24.3141	7	2.54028	28.2857	2	3	2	0	0	58	21.048	-2	-0.725795	1
1077	0	6	13	7	8	20	10	7	-6	1	12	-10	29	1	1	2	2	1	1	0	3	8	2	1.7	56	19.3772	63	21.7993	7	2.42215	29.2857	2	4	3	0	0	50	17.301	-6	-2.07612	1
1078	0	m	3	6	18	m	m	m	3	12	m	m	m	1	m	m	m	m	m	m	m	m	1	m	m	m	m	m	m	m	m	2	0	1	m	m	m	m	m	m	m
1079	0	10	2	3	9	m	m	-8	1	6	m	m	26	2	1	3	2	1	0	0	2	7	1	1.58	53.5	21.4309	62	24.8358	8.5	3.4049	29.2857	2	2	1	m	m	m	m	m	m	m
1080	0	5	14	22	22	11	7	9	8	0	-11	-4	34	1	0	3	3	1	1	0	2	8	1	1.65	53	19.4674	58	21.3039	5	1.83655	27.8571	2	m	3	1	1	54	19.8347	1	0.367309	0
1081	0	6	2	8	m	m	8	-4	6	m	m	m	30	1	1	3	2	1	1	1	2	7	1	1.74	58	19.1571	68	22.46	10	3.30295	29.8571	2	0	1	0	1	66	21.7994	8	2.64236	0
1083	0	m	12	2	12	12	m	m	-10	10	0	m	m	1	m	m	m	m	m	m	m	m	2	m	m	m	m	m	m	m	28.4286	2	7	3	m	m	m	m	m	m	m
1087	0	5	6	8	2	m	m	1	2	-6	m	m	31	1	1	3	3	1	0	0	2	8	2	1.63	55	20.7008	m	m	m	m	29.2857	2	7	2	m	m	m	m	m	m	m
1090	0	6	14	14	8	2	m	8	0	-6	-6	m	27	2	1	1	1	1	0	0	3	8	1	1.63	50	18.8189	65	24.4646	15	5.64568	29.7143	2	3	3	m	m	m	m	m	m	m
1092	0	4	3	4	7	3	m	-1	1	3	-4	m	28	1	1	3	2	1	1	0	2	9	1	1.69	61	21.3578	73.6	25.7694	12.6	4.41161	29.4286	2	0	1	m	m	m	m	m	m	m
1094	0	4	0	4	3	6	5	-4	4	-1	3	-1	28	1	1	3	3	1	0	0	2	8	1	1.68	65	23.03	76.6	27.14	11.6	4.10998	29.5714	2	0	1	0	1	54	19.1327	-11	-3.89739	1
1098	0	9	15	4	21	12	m	6	-11	17	-9	m	29	m	0	3	2	1	0	0	2	7	2	1.68	64	22.6757	82	29.0533	18	6.37755	30.1429	2	4	3	m	m	m	m	m	m	m
1101	0	12	5	3	3	7	m	-7	-2	0	4	m	31	1	1	3	3	1	1	0	2	8	2	1.7	56	19.3772	67	23.1834	11	3.80623	29.1429	1	0	2	m	m	m	m	m	m	m
1104	0	0	1	5	9	12	m	1	4	4	3	m	42	2	m	3	2	1	1	1	3	9	2	1.54	42	17.7096	48	20.2395	6	2.52994	29.5714	2	0	1	m	m	m	m	m	m	m
1105	1	14	m	m	33	18	m	m	m	m	-15	m	32	2	1	3	2	1	0	0	3	7	m	1.65	48	17.6309	60.5	22.2222	12.5	4.59137	29.1429	m	m	m	m	m	m	m	m	m	m
1106	0	4	2	12	18	4	m	-2	10	6	-14	m	29	1	1	3	m	1	1	0	2	7	2	1.73	54	18.0427	65	21.7181	11	3.67537	28.5714	2	0	1	m	m	m	m	m	m	m
1107	0	4	3	2	7	m	m	-1	-1	5	m	m	29	1	1	2	3	1	0	0	1	6	m	1.68	64	22.6757	74	26.2188	10	3.54308	28.4286	2	0	1	m	m	m	m	m	m	m
1108	0	5	7	11	12	7	7	2	4	1	-5	0	31	2	0	3	2	1	0	0	2	8	1	1.55	56.2	23.3923	63	26.2227	6.8	2.83039	29.7143	2	3	2	0	0	55	22.8928	-1.2	-0.49948	1
1109	0	9	m	m	21	10	m	m	m	m	-11	m	28	1	1	3	3	1	0	0	2	7	m	1.61	47	18.132	56	21.6041	9	3.47209	29.5714	m	m	m	m	m	m	m	m	m	m
1110	0	6	m	m	6	2	m	m	m	m	-4	m	28	1	1	2	1	1	1	0	1	7	m	1.69	70	24.5089	83	29.0606	13	4.55166	28.1429	m	m	m	m	m	m	m	m	m	m
1111	0	13	m	m	16	20	m	m	m	m	4	m	28	1	1	3	3	1	1	0	2	7	m	1.73	60	20.0474	73	24.3911	13	4.34361	30.4286	m	m	m	m	m	m	m	m	m	m
1113	0	4	13	9	10	15	m	9	-4	1	5	m	31	1	1	3	2	1	1	0	2	8	1	1.7	57.9	20.0346	67.5	23.3564	9.6	3.3218	28.5714	2	3	3	m	m	m	m	m	m	m
1115	0	1	m	m	10	3	m	m	m	m	-7	m	27	1	1	2	2	1	1	0	3	9	m	1.57	50	20.2848	60	24.3418	10	4.05696	28	m	m	m	m	m	m	m	m	m	m
1120	0	9	6	12	9	7	m	-3	6	-3	-2	m	33	2	1	3	3	1	1	1	2	7	1	1.65	58.3	21.4141	69	25.3444	10.7	3.93021	28	2	1	2	m	m	m	m	m	m	m
1122	0	6	m	m	12	8	m	m	m	m	-4	m	34	2	1	m	3	1	1	0	3	9	m	1.64	57	21.1927	63.5	23.6095	6.5	2.41672	30	m	m	m	m	m	m	m	m	m	m
1123	0	8	12	1	19	4	m	4	-11	18	-15	m	32	2	1	3	3	1	0	0	2	8	1	1.59	50	19.7777	61	24.1288	11	4.35109	30	2	7	3	m	m	m	m	m	m	m
1132	0	2	6	5	8	8	9	4	-1	3	0	1	30	1	1	3	2	1	0	0	2	8	1	1.66	52	18.8707	66	23.9512	14	5.08056	29.7143	2	2	2	0	1	55	19.9594	3	1.08869	0
6	0	8	m	m	8	4	m	m	m	m	-4	m	29	1	1	3	1	1	1	0	2	8	m	1.64	55	20.4491	67	24.9108	12	4.46163	30	m	m	m	m	m	m	m	m	m	m
7	0	4	m	m	11	10	m	m	m	m	-1	m	27	1	0	2	2	1	1	1	1	7	m	1.68	59	20.9042	71	25.1559	12	4.2517	29.4286	m	m	m	m	m	m	m	m	m	m
11	0	2	3	1	4	12	m	1	-2	3	8	m	39	2	1	2	3	1	0	0	2	5	1	1.58	68.8	27.5597	77	30.8444	8.2	3.28473	29.7143	2	0	1	m	m	m	m	m	m	m
13	0	12	4	6	4	m	m	-8	2	-2	m	m	32	1	1	3	2	1	1	0	2	5	2	1.68	70	24.8016	80	28.3447	10	3.54308	28.2857	1	0	1	m	m	m	m	m	m	m
14	0	4	0	1	14	6	m	-4	1	13	-8	m	28	1	1	3	3	1	1	0	3	7	2	1.6	54	21.0938	44.5	17.3828	-9.5	-3.71094	29.1429	1	0	1	m	m	m	m	m	m	m
18	0	8	6	7	28	11	m	-2	1	21	-17	m	30	1	1	3	2	1	1	1	2	9	2	1.61	56	21.6041	66	25.462	10	3.85788	29.4286	2	1	2	m	m	m	m	m	m	m
20	0	13	14	12	3	1	m	1	-2	-9	-2	m	34	2	1	3	2	1	0	1	2	7	2	1.63	50	18.8189	59	22.2063	9	3.38741	29	2	0	3	m	m	m	m	m	m	m
41	0	20	20	5	17	7	m	0	-15	12	-10	m	27	1	1	1	2	1	0	1	2	7	2	1.67	45	16.1354	68	24.3824	23	8.24698	29.7143	2	6	4	m	m	m	m	m	m	m
42	0	11	m	m	20	9	m	m	m	m	-11	m	29	1	1	3	3	1	1	1	2	7	m	1.6	51	19.9219	63	24.6094	12	4.6875	30.5714	m	m	m	m	m	m	m	m	m	m
45	0	2	2	0	6	3	m	0	-2	6	-3	m	29	1	1	3	3	1	0	0	2	10	1	1.55	50	20.8117	60	24.974	10	4.16233	29.5714	2	0	1	m	m	m	m	m	m	m
47	0	2	10	8	12	3	m	8	-2	4	-9	m	29	1	1	3	3	1	1	0	2	6	2	1.63	52	19.5717	64	24.0882	12	4.51654	29.7143	2	2	3	m	m	m	m	m	m	m
49	0	18	m	m	7	4	m	m	m	m	-3	m	27	1	1	3	3	1	1	1	2	5	m	1.63	60	22.5827	69	25.9701	9	3.38741	28.2857	m	m	m	m	m	m	m	m	m	m
51	0	5	10	m	8	m	m	5	m	m	m	m	34	2	1	3	3	1	0	1	2	7	m	1.65	53	19.4674	61	22.4059	8	2.93848	28.2857	1	3	3	m	m	m	m	m	m	m
75	0	8	16	13	6	m	7	8	-3	-7	m	m	33	1	0	3	2	1	1	1	2	8	2	1.59	49.35	19.5206	55.7	22.0324	6.35	2.51177	29.7143	1	3	4	0	0	47	18.591	-2.35	-0.929552	1
79	0	12	12	8	15	m	m	0	-4	7	m	m	30	1	m	3	m	1	1	0	3	8	m	1.62	46	17.5278	53	20.1951	7	2.66728	30	2	0	3	m	m	m	m	m	m	m
87	0	8	m	m	10	9	m	m	m	m	-1	m	30	1	1	3	3	1	1	0	2	8	m	1.6	50	19.5312	60	23.4375	10	3.90625	29.4286	m	m	m	m	m	m	m	m	m	m
94	0	m	4	16	17	5	m	m	12	1	-12	m	30	1	1	3	2	1	1	1	2	8	2	1.6	43	16.7969	53	20.7031	10	3.90625	29.2857	2	3	1	m	m	m	m	m	m	m
95	0	4	2	2	4	5	m	-2	0	2	1	m	29	1	1	3	2	1	1	0	3	8	2	1.7	56	19.3772	64.5	22.3183	8.5	2.94118	29.5714	2	1	1	m	m	m	m	m	m	m
100	0	15	25	4	6	11	m	10	-21	2	5	m	35	2	1	3	3	1	1	1	3	8	2	1.55	49	20.3954	60.5	25.1821	11.5	4.78668	28.5714	2	5	4	m	m	m	m	m	m	m
103	0	9	8	15	7	m	m	-1	7	-8	m	m	30	1	0	3	3	1	1	1	2	9	1	1.6	50	19.5312	60	23.4375	10	3.90625	29.8571	2	0	2	m	m	m	m	m	m	m
107	0	10	4	4	2	m	m	-6	0	-2	m	m	25	1	1	2	2	1	0	0	2	8	m	1.63	69	25.9701	79	29.7339	10	3.76378	29.1429	2	0	1	m	m	m	m	m	m	m
114	0	10	18	12	7	m	m	8	-6	-5	m	m	40	1	0	1	1	1	1	0	2	8	2	1.69	75	26.2596	90	31.5115	15	5.25192	29.1429	1	0	4	m	m	m	m	m	m	m
125	0	8	3	9	9	4	6	-5	6	0	-5	2	35	1	1	3	2	1	1	0	2	7	1	1.61	57	21.9899	63	24.3046	6	2.31473	29.2857	2	2	1	0	1	55	21.2183	-2	-0.771575	1
129	0	8	20	9	m	m	7	12	-11	m	m	m	28	1	1	3	2	1	1	0	2	7	2	1.68	55	19.487	69	24.4473	14	4.96032	29	2	0	4	0	1	54	19.1327	-1	-0.354308	1
130	0	11	6	6	m	m	0	-5	0	m	m	m	33	1	1	1	1	1	1	1	1	7	1	1.58	55	22.0317	62	24.8358	7	2.80404	28.4286	2	0	2	0	1	50	20.0288	-5	-2.00288	1
131	0	4	4	13	m	m	9	0	9	m	m	m	27	1	1	3	2	1	1	0	2	10	2	1.7	55	19.0311	70	24.2215	15	5.19031	30.4286	2	3	1	1	1	52	17.9931	-3	-1.03806	1
132	0	3	6	13	11	6	5	3	7	-2	-5	-1	29	1	1	3	2	1	1	0	2	7	2	1.68	51	18.0697	60	21.2585	9	3.18878	29.7143	2	4	2	0	1	51	18.0697	0	0	1
137	0	4	0	4	3	6	5	-4	4	-1	3	-1	28	1	1	3	3	1	0	0	2	8	1	1.68	65	23.03	76.6	27.14	11.6	4.10998	29.5714	2	0	1	0	1	54	19.1327	-11	-3.89739	1
138	0	17	7	5	11	m	2	-10	-2	6	m	m	m	1	1	3	2	1	1	0	1	8	2	1.67	58	20.7967	74	26.5338	16	5.73703	28.1429	2	3	2	1	1	56	20.0796	-2	-0.717129	1
142	0	6	5	6	6	3	8	-1	1	0	-3	5	29	2	0	3	3	1	1	0	2	5	2	1.6	44	17.1875	56	21.875	12	4.6875	29.8571	2	6	2	1	1	54	21.0938	10	3.90625	0
145	0	12	m	m	8	1	m	m	m	m	-7	m	27	2	0	2	3	1	1	0	2	6	m	1.68	58.9	20.8688	68.6	24.3056	9.7	3.43679	29.4286	2	m	m	m	m	m	m	m	m	m
148	0	17	9	9	4	6	14	-8	0	-5	2	8	23	1	0	1	2	1	1	0	2	8	1	1.65	63	23.1405	m	m	m	m	29.4286	1	2	2	0	0	70	25.7117	7	2.57117	0
153	0	8	12	6	m	m	14	4	-6	m	m	m	26	1	1	3	2	1	1	0	3	8	2	1.58	52	20.83	67.5	27.0389	15.5	6.20894	29.4286	2	5	3	0	1	50	20.0288	-2	-0.801154	1
154	0	9	14	15	m	m	9	5	1	m	m	m	32	1	1	3	3	1	1	0	1	6	1	1.68	50	17.7154	59	20.9042	9	3.18878	29.4286	2	m	3	0	1	52	18.424	2	0.708617	0
157	0	5	m	m	9	15	m	m	m	m	6	m	34	2	1	3	1	1	1	0	3	10	m	1.57	49.5	20.082	59.5	24.1389	10	4.05696	29.7143	2	m	m	m	m	m	m	m	m	m
162	0	21	0	13	12	3	7	-21	13	-1	-9	4	31	1	1	2	2	1	1	0	3	9	1	1.66	53	19.2336	64.75	23.4976	11.75	4.26404	29	2	2	1	1	1	55	19.9594	2	0.725795	0
165	0	3	m	m	20	12	10	m	m	m	-8	-2	28	1	1	3	2	1	1	0	2	8	m	1.61	57	21.9899	59	22.7615	2	0.771575	29.5714	2	m	m	0	1	50	19.2894	-7	-2.70051	1
166	0	11	1	5	m	m	3	-10	4	m	m	m	m	1	1	3	1	1	0	0	2	8	2	1.6	53	20.7031	65	25.3906	12	4.6875	29.4286	2	0	1	0	0	56	21.875	3	1.17188	0
167	0	m	6	9	13	6	11	m	3	4	-7	5	29	1	1	2	2	1	1	0	3	8	2	1.6	57	22.2656	66	25.7812	9	3.51562	28.5714	2	1	2	0	0	60	23.4375	3	1.17188	0
187	0	4	2	0	10	4	m	-2	-2	10	-6	m	32	2	1	2	1	1	0	0	2	8	m	1.6	57.65	22.5195	65.36	25.5312	7.71	3.01172	28.5714	1	1	1	m	m	m	m	m	m	m
189	0	7	m	4	5	13	1	m	m	1	8	-12	29	1	1	3	3	1	1	0	2	7	1	1.59	49.4	19.5404	58.5	23.1399	9.1	3.59954	29.2857	2	m	m	0	0	56	22.151	6.6	2.61066	0
196	0	6	2	5	21	11	3	-4	3	16	-10	-8	33	1	1	3	3	1	1	1	2	8	2	1.62	55	20.9572	63	24.0055	8	3.04832	29.2857	2	1	1	0	1	55	20.9572	0	0	1
198	0	m	2	2	3	m	4	m	0	1	m	m	35	2	0	3	3	1	1	1	2	8	2	1.6	52	20.3125	59	23.0469	7	2.73438	28.4286	2	0	1	0	0	48	18.75	-4	-1.5625	1
199	0	8	0	4	7	3	6	-8	4	3	-4	3	32	1	1	3	1	1	1	0	2	8	2	1.6	53	20.7031	59	23.0469	6	2.34375	29.4286	2	0	1	0	1	58	22.6562	5	1.95312	0
212	0	9	2	10	4	m	9	-7	8	-6	m	m	30	1	1	3	2	1	1	0	3	9	1	1.67	61	21.8724	68.55	24.5796	7.55	2.70716	27.2857	2	2	1	0	1	66	23.6652	5	1.79282	0
218	0	11	12	m	13	11	8	1	m	m	-2	-3	30	1	1	3	3	1	0	1	m	5	2	1.6	45.5	17.7734	m	m	m	m	28	2	6	3	0	1	49	19.1406	3.5	1.36719	0
219	0	6	18	5	m	m	9	12	-13	m	m	m	28	1	1	3	2	1	1	0	3	8	1	1.68	60	21.2585	70.8	25.085	10.8	3.82653	28.1429	2	8	4	1	0	61	21.6128	1	0.354308	0
225	1	13	11	2	20	5	21	-2	-9	18	-15	16	27	1	1	2	1	1	0	0	3	8	1	1.66	52	18.8707	60	21.7738	8	2.90318	29.2857	2	0	3	1	0	55	19.9594	3	1.08869	0
253	0	12	m	m	13	16	5	m	m	m	3	-11	34	1	1	3	2	1	1	0	2	8	2	1.54	49	20.6612	62	26.1427	13	5.48153	29.2857	2	m	m	0	0	55	23.1911	6	2.52994	0
265	0	2	6	3	25	7	m	4	-3	22	-18	m	34	2	1	3	2	1	1	0	2	8	2	1.65	58	21.3039	64	23.5078	6	2.20386	29	2	2	2	m	m	m	m	m	m	m
266	0	3	2	5	15	7	2	-1	3	10	-8	-5	30	1	1	2	2	2	1	0	2	8	2	1.68	57	20.1956	67	23.7387	10	3.54308	29.5714	2	0	1	0	1	m	m	m	m	m
268	0	1	4	7	13	9	9	3	3	6	-4	0	36	1	1	3	2	1	1	0	2	10	2	1.6	50	19.5312	60	23.4375	10	3.90625	29	2	2	1	1	0	50	19.5312	0	0	1
271	0	7	m	m	17	9	2	m	m	m	-8	-7	22	2	m	1	1	1	1	0	2	7	m	1.62	55	20.9572	67	25.5296	12	4.57247	30	2	m	m	0	0	60	22.8624	5	1.9052	0
274	0	11	12	5	5	m	7	1	-7	0	m	m	37	1	1	3	2	1	1	0	2	8	2	1.66	65	23.5883	80	29.0318	15	5.44346	29	2	2	3	0	1	70	25.4028	5	1.81449	0
277	0	17	m	m	7	22	m	m	m	m	15	m	23	1	0	3	2	1	1	0	2	8	2	1.62	44	16.7657	49.7	18.9377	5.7	2.17193	29.4286	m	m	m	m	m	m	m	m	m	m
280	0	13	22	17	5	6	7	9	-5	-12	1	1	33	2	1	3	3	1	0	1	1	7	2	1.65	71	26.079	75	27.5482	4	1.46924	29.7143	2	0	4	0	0	80	29.3848	9	3.30579	0
282	0	10	9	10	m	m	2	-1	1	m	m	m	36	2	1	3	3	1	1	0	2	9	2	1.54	51	21.5045	59	24.8777	8	3.37325	27.1429	2	3	2	0	0	54	22.7694	3	1.26497	0
289	0	13	4	m	5	m	m	-9	m	m	m	m	30	2	1	2	3	1	1	1	2	8	m	1.62	53	20.1951	64	24.3865	11	4.19143	28	2	5	1	m	m	m	m	m	m	m
292	0	19	19	15	5	m	8	0	-4	-10	m	m	30	2	1	3	2	1	0	1	1	7	2	1.67	52	18.6453	55	19.721	3	1.07569	28.1429	2	7	4	0	0	56	20.0796	4	1.43426	0
296	0	m	1	13	17	2	m	m	12	4	-15	m	25	1	1	2	2	1	1	0	2	8	2	1.53	49	20.9321	55	23.4952	6	2.56312	29.5714	2	0	1	m	m	m	m	m	m	m
305	0	5	5	2	m	m	9	0	-3	m	m	m	33	1	1	3	3	1	1	0	2	9	m	1.6	55.1	21.5234	65	25.3906	9.9	3.86719	29	2	0	2	0	1	60	23.4375	4.9	1.91406	0
310	0	8	2	8	6	3	10	-6	6	-2	-3	7	29	1	1	3	3	1	1	0	1	7	2	1.55	54	22.4766	69	28.7201	15	6.2435	30	2	0	1	0	0	57	23.7253	3	1.2487	0
313	0	4	2	2	0	m	7	-2	0	-2	m	m	28	1	1	3	3	1	1	0	2	8	1	1.6	52	20.3125	69	26.9531	17	6.64062	28	2	0	1	0	0	48	18.75	-4	-1.5625	1
314	0	9	3	1	2	0	5	-6	-2	1	-2	5	33	1	m	3	3	1	0	0	2	7	2	1.68	55	19.487	69	24.4473	14	4.96032	30.5714	2	2	1	0	1	62	21.9671	7	2.48016	0
330	0	6	4	8	22	8	4	-2	4	14	-14	-4	35	2	1	3	2	1	1	1	3	8	2	1.58	55	22.0317	65	26.0375	10	4.00577	30.1429	2	4	1	0	1	56	22.4323	1	0.400577	0
332	0	13	m	2	9	4	m	m	m	7	-5	m	37	2	1	3	3	1	0	0	2	8	2	1.57	46	18.662	m	m	m	m	30	2	0	m	m	m	m	m	m	m	m
334	0	8	9	4	6	4	m	1	-5	2	-2	m	39	2	0	3	3	1	0	0	2	8	2	1.62	50	19.052	64	24.3865	14	5.33455	29.7143	2	3	2	m	m	m	m	m	m	m
335	0	16	8	5	m	m	7	-8	-3	m	m	m	38	2	1	3	3	1	0	0	1	8	1	1.7	62	21.4533	70	24.2215	8	2.76817	29.2857	2	7	2	1	0	68	23.5294	6	2.07612	0
340	0	11	15	3	10	1	0	4	-12	7	-9	-1	29	2	1	1	2	1	1	0	1	7	2	1.6	55	21.4844	66	25.7812	11	4.29688	29.5714	2	5	3	1	1	60	23.4375	5	1.95312	0
344	0	19	17	12	18	5	m	-2	-5	6	-13	m	38	2	m	3	m	1	1	0	2	6	1	1.55	49.5	20.6035	54	22.4766	4.5	1.87305	28.4286	2	2	4	m	m	m	m	m	m	m
345	0	6	m	5	10	4	6	m	m	5	-6	2	29	1	1	3	3	1	1	0	2	7	1	1.67	60	21.5139	72	25.8166	12	4.30277	29.5714	2	0	m	0	1	65	23.3067	5	1.79282	0
347	0	5	14	22	22	11	7	9	8	0	-11	-4	34	1	0	3	3	1	1	0	2	8	1	1.65	53	19.4674	58	21.3039	5	1.83655	27.8571	2	m	3	1	1	54	19.8347	1	0.367309	0
352	0	13	9	13	8	6	4	-4	4	-5	-2	-2	37	2	0	2	3	1	0	1	1	6	2	1.55	62	25.8065	65.2	27.1384	3.2	1.33195	29	2	3	2	0	0	57	23.7253	-5	-2.08117	1
356	0	3	3	6	7	4	7	0	3	1	-3	3	26	1	1	3	3	1	0	0	2	9	1	1.66	62	22.4996	67	24.3141	5	1.81449	28.8571	2	3	1	0	0	62	22.4996	0	0	1
357	0	9	6	5	6	m	3	-3	-1	1	m	m	32	1	1	3	3	1	1	0	3	10	2	1.67	57	20.4382	67	24.0238	10	3.58564	29.1429	1	0	2	0	1	59	21.1553	2	0.717129	0
358	0	17	7	5	11	m	2	-10	-2	6	m	m	m	1	1	3	2	1	1	0	1	8	2	1.67	58	20.7967	74	26.5338	16	5.73703	28.1429	2	3	2	1	1	56	20.0796	-2	-0.717129	1
373	0	17	8	9	15	9	11	-9	1	6	-6	2	27	1	1	3	3	1	0	0	2	7	1	1.56	60	24.6548	65	26.7094	5	2.05457	29	2	2	2	0	0	68	27.9421	8	3.28731	0
374	1	15	6	28	28	m	21	-9	22	0	m	m	27	1	1	3	2	1	0	0	2	7	1	1.6	43.55	17.0117	53.5	20.8984	9.95	3.88672	m	2	1	2	1	1	47	18.3594	3.45	1.34766	0
375	0	3	17	2	6	2	7	14	-15	4	-4	5	35	1	1	3	3	1	0	0	2	7	1	1.65	59.5	21.8549	65	23.8751	5.5	2.0202	28.2857	2	6	4	0	1	60	22.0386	0.5	0.183655	0
376	0	1	4	7	13	9	9	3	3	6	-4	0	36	1	1	3	2	1	1	0	2	10	2	1.6	50	19.5312	60	23.4375	10	3.90625	29	2	2	1	1	0	50	19.5312	0	0	1
377	0	6	4	8	22	8	4	-2	4	14	-14	-4	35	2	1	3	2	1	1	1	3	8	2	1.58	55	22.0317	65	26.0375	10	4.00577	30.1429	2	4	1	0	1	56	22.4323	1	0.400577	0
378	0	17	3	3	12	7	7	-14	0	9	-5	0	30	1	1	3	2	1	1	0	2	6	1	1.58	46.54	18.6428	55	22.0317	8.46	3.38888	29.8571	2	0	1	0	0	43	17.2248	-3.54	-1.41804	1
380	0	20	8	7	16	7	3	-12	-1	9	-9	-4	33	1	0	3	3	1	0	0	2	8	1	1.63	56	21.0772	69.5	26.1583	13.5	5.08111	29.4286	2	0	2	0	1	59	22.2063	3	1.12914	0
382	0	13	10	4	18	20	3	-3	-6	14	2	-17	30	1	1	3	2	1	1	0	3	10	2	1.53	56	23.9224	m	m	m	m	29.1429	2	5	3	0	0	56	23.9224	0	0	1
383	0	4	0	3	5	2	m	-4	3	2	-3	m	30	1	1	3	2	1	1	0	2	8	2	1.55	46	19.1467	55	22.8928	9	3.7461	29.2857	2	0	1	m	m	m	m	m	m	m
385	0	1	2	4	6	m	1	1	2	2	m	m	28	1	1	3	1	1	1	1	2	8	1	1.59	61.9	24.4848	67.9	26.8581	6	2.37332	28.4286	1	5	1	0	0	55	21.7555	-6.9	-2.72932	1
389	0	12	8	16	16	7	2	-4	8	0	-9	-5	30	1	1	3	3	1	0	0	1	4	1	1.6	76	29.6875	88	34.375	12	4.6875	29	2	3	2	0	1	74	28.9062	-2	-0.78125	1
402	0	8	4	11	24	15	5	-4	7	13	-9	-10	34	1	1	2	2	1	1	0	2	8	1	1.52	52.5	22.7233	58.6	25.3636	6.1	2.64024	29.2857	2	0	1	0	1	51	22.0741	-1.5	-0.649238	1
403	0	6	7	2	4	0	1	1	-5	2	-4	1	30	1	1	3	2	1	m	0	2	8	2	1.58	m	m	m	m	m	m	30.8571	2	0	2	0	1	56	22.4323	m	m	m
405	0	9	1	3	3	1	2	-8	2	0	-2	1	31	1	1	3	3	1	1	0	3	6	2	1.58	51	20.4294	58.1	23.2735	7.1	2.8441	28.2857	1	0	1	1	0	55	22.0317	4	1.60231	0
407	0	10	14	5	6	3	7	4	-9	1	-3	4	31	1	1	2	2	1	1	0	3	7	1	1.6	55.4	21.6406	64.65	25.2539	9.25	3.61328	29.2857	1	0	3	0	1	60	23.4375	4.6	1.79688	0
408	0	10	8	28	19	9	4	-2	20	-9	-10	-5	36	2	0	3	3	1	1	0	2	8	1	1.61	54	20.8325	63	24.3046	9	3.47209	29.1429	2	0	2	0	1	55	21.2183	1	0.385788	0
410	0	3	0	2	5	6	3	-3	2	3	1	-3	29	1	1	3	2	1	1	0	2	7	1	1.52	44	19.0443	54	23.3726	10	4.32825	29	2	0	1	0	1	47	20.3428	3	1.29848	0
411	0	6	m	5	10	4	6	m	m	5	-6	2	29	1	1	3	3	1	1	0	2	7	1	1.67	60	21.5139	72	25.8166	12	4.30277	29.5714	2	0	m	0	1	65	23.3067	5	1.79282	0
413	1	17	16	7	8	8	28	-1	-9	1	0	20	29	1	1	3	2	1	1	0	m	6	2	1.68	58.7	20.7979	65	23.03	6.3	2.23214	29.2857	2	0	4	1	0	65	23.03	6.3	2.23214	0
415	0	8	2	7	0	10	1	-6	5	-7	10	-9	26	1	1	3	2	1	0	1	2	7	1	1.63	53.2	20.0233	65	24.4646	11.8	4.44127	30.2857	2	0	1	0	0	55	20.7008	1.8	0.677481	0
419	1	10	2	14	18	5	20	-8	12	4	-13	15	35	1	0	3	2	1	0	0	3	8	m	1.55	51.6	21.4776	56	23.3091	4.4	1.83143	28.4286	1	0	1	1	1	52	21.6441	0.4	0.166493	0
420	1	10	2	14	18	5	20	-8	12	4	-13	15	35	1	0	3	2	1	0	0	3	8	m	1.53	50	21.3593	56	23.9224	6	2.56312	28.4286	1	0	1	1	1	52	22.2137	2	0.854372	0
422	0	4	m	m	19	4	5	m	m	m	-15	1	30	1	1	3	2	1	1	0	2	8	1	1.61	42	16.2031	49	18.9036	7	2.70051	29	m	m	m	0	0	37	14.2741	-5	-1.92894	1
423	0	9	5	17	11	m	14	-4	12	-6	m	m	34	1	1	3	3	1	1	0	3	8	m	1.65	53	19.4674	63	23.1405	10	3.67309	28	2	0	2	0	1	55	20.202	2	0.734619	0
429	0	9	8	4	m	m	11	-1	-4	m	m	m	31	2	1	3	2	1	1	1	2	8	1	1.62	55	20.9572	67	25.5296	12	4.57247	29	2	0	2	0	1	65	24.7676	10	3.81039	0
437	0	11	16	9	3	13	16	5	-7	-6	10	3	26	1	1	3	3	1	0	0	2	10	1	1.65	67	24.6097	74	27.1809	7	2.57117	31	2	6	4	0	1	62.5	22.9568	-4.5	-1.65289	1
442	0	m	2	2	16	3	m	m	0	14	-13	m	m	1	m	m	m	m	m	m	m	m	2	m	m	m	m	m	m	m	m	2	0	1	m	m	m	m	m	m	m
471	0	5	7	2	5	3	m	2	-5	3	-2	m	41	2	1	3	1	1	1	1	3	9	2	1.6	66	25.7812	78	30.4688	12	4.6875	29.7143	2	0	2	m	m	m	m	m	m	m
472	0	11	4	2	1	1	2	-7	-2	-1	0	1	32	2	1	3	3	1	0	1	3	8	2	1.58	54	21.6311	64	25.6369	10	4.00577	29.7143	2	0	1	1	0	56	22.4323	2	0.801154	0
473	0	13	m	m	10	3	m	m	m	m	-7	m	33	2	1	3	3	1	1	1	2	8	m	1.63	60	22.5827	73	27.4756	13	4.89292	29.5714	2	m	m	m	m	m	m	m	m	m
475	0	0	1	1	3	0	m	1	0	2	-3	m	41	2	1	3	3	1	1	0	2	8	2	1.63	57	21.4536	67	25.2174	10	3.76378	29.1429	2	0	1	m	m	m	m	m	m	m
477	0	11	8	6	15	5	m	-3	-2	9	-10	m	36	2	1	2	3	1	1	0	2	9	1	1.67	60	21.5139	73	26.1752	13	4.66134	28.2857	2	0	2	m	m	m	m	m	m	m
480	0	0	0	2	13	8	0	0	2	11	-5	-8	37	2	1	3	3	1	0	0	2	8	2	1.65	62	22.7732	72	26.4463	10	3.67309	28.4286	2	0	1	0	1	70	25.7117	8	2.93848	0
481	1	m	28	22	39	25	m	m	-6	17	-14	m	37	2	0	1	m	1	1	0	3	10	2	1.62	62	23.6244	66.9	25.4915	4.9	1.86709	29.2857	2	5	4	m	m	m	m	m	m	m
483	0	5	0	2	7	3	m	-5	2	5	-4	m	36	2	1	3	1	1	1	0	2	8	2	1.63	57	21.4536	63	23.7118	6	2.25827	29.4286	1	0	1	m	m	m	m	m	m	m
494	0	10	10	11	18	9	m	0	1	7	-9	m	34	2	1	3	3	1	1	1	2	9	1	1.63	58	21.83	64	24.0882	6	2.25827	29.7143	2	0	3	m	m	m	m	m	m	m
496	0	12	5	23	7	m	m	-7	18	-16	m	m	34	2	1	3	2	1	0	1	3	9	m	1.53	54	23.0681	65	27.7671	11	4.69905	29	2	2	2	m	m	m	m	m	m	m
508	0	19	1	14	m	m	10	-18	13	m	m	m	39	2	1	3	3	1	1	1	3	8	2	1.55	53	22.0604	60	24.974	7	2.91363	29.5714	1	0	1	0	1	52	21.6441	-1	-0.416233	1
509	0	17	23	15	12	22	m	6	-8	-3	10	m	37	2	0	1	1	2	1	0	2	6	1	1.61	63	24.3046	75	28.9341	12	4.62945	29.4286	2	0	4	m	m	m	m	m	m	m
511	0	7	m	m	23	10	11	m	m	m	-13	1	34	2	0	1	1	2	0	0	1	6	1	1.58	81	32.4467	87	34.8502	6	2.40346	29.7143	m	m	m	0	1	82.5	33.0476	1.5	0.600865	0
519	0	17	9	20	m	m	11	-8	11	m	m	m	30	2	1	3	m	1	1	0	2	8	2	1.77	45	14.3637	54	17.2364	9	2.87274	28.8571	2	4	2	0	1	50	15.9597	5	1.59597	0
522	0	15	6	13	7	4	5	-9	7	-6	-3	1	31	1	1	3	2	1	1	0	2	6	2	1.58	61.5	24.6355	68.5	27.4395	7	2.80404	28.5714	2	0	2	0	1	65	26.0375	3.5	1.40202	0
531	0	8	4	3	m	m	2	-4	-1	m	m	m	38	2	0	3	3	1	0	0	2	8	1	1.62	62	23.6244	72	27.4348	10	3.81039	30.4286	2	0	1	1	1	65	24.7676	3	1.14312	0
534	0	19	8	33	17	m	9	-11	25	-16	m	m	30	2	1	3	3	1	1	0	3	9	1	1.57	54	21.9076	64	25.9645	10	4.05696	29.1429	2	1	2	0	1	42.5	17.2421	-11.5	-4.6655	1
535	0	10	9	5	2	m	m	-1	-4	-3	m	m	32	2	1	3	2	1	0	0	2	9	1	1.62	63	24.0055	73	27.8159	10	3.81039	29.7143	2	0	2	m	m	m	m	m	m	m
538	0	3	3	2	3	7	7	0	-1	1	4	0	31	2	0	3	2	1	0	1	2	9	m	1.64	69	25.6544	80	29.7442	11	4.08983	30	2	4	1	0	1	56	20.8209	-13	-4.83343	1
544	0	13	25	8	25	7	2	12	-17	17	-18	-5	32	1	1	3	3	1	1	0	3	7	2	1.58	61	24.4352	67	26.8386	6	2.40346	28	2	2	4	0	0	65	26.0375	4	1.60231	0
549	0	14	11	10	m	m	8	-3	-1	m	m	m	37	2	m	m	m	m	1	1	2	7	2	1.6	55	21.4844	62.5	24.4141	7.5	2.92969	29.1429	2	0	3	0	0	57.5	22.4609	2.5	0.976562	0
551	0	13	m	9	20	20	13	m	m	11	0	-7	26	2	0	2	1	2	0	0	2	8	1	1.66	48	17.4191	58.5	21.2295	10.5	3.81042	30	m	m	m	0	0	51	18.5078	3	1.08869	0
553	0	10	6	5	26	25	12	-4	-1	21	-1	-13	34	2	1	2	2	1	0	1	2	7	m	1.65	60	22.0386	66.5	24.4261	6.5	2.38751	29.1429	1	2	2	0	1	60	22.0386	0	0	1
554	0	8	8	2	m	m	9	0	-6	m	m	m	31	2	1	3	3	1	1	1	2	6	1	1.63	50	18.8189	57	21.4536	7	2.63465	28.2857	2	4	2	0	1	54	20.3244	4	1.50551	0
556	0	6	4	9	2	14	m	-2	5	-7	12	m	32	2	1	3	2	1	1	1	2	9	2	1.56	49.5	20.3402	57	23.4221	7.5	3.08185	29.5714	2	0	1	m	m	m	m	m	m	m
557	0	4	m	m	19	4	5	m	m	m	-15	1	30	1	1	3	2	1	1	0	2	8	1	1.62	42	16.0037	49	18.6709	7	2.66728	29.05	m	m	m	0	0	37.5	14.289	-4.5	-1.71468	1
559	1	17	16	7	8	8	28	-1	-9	1	0	20	29	1	1	3	2	1	1	0	m	6	2	1.68	58.7	20.7979	65	23.03	6.3	2.23214	29.2857	2	0	4	1	0	65	23.03	6.3	2.23214	0
560	0	14	10	9	19	10	m	-4	-1	10	-9	m	34	2	1	3	3	2	1	0	2	9	2	1.6	52	20.3125	67	26.1719	15	5.85938	28.8571	2	0	3	m	m	m	m	m	m	m
561	0	19	m	5	2	11	11	m	m	-3	9	0	34	2	1	1	3	1	0	1	3	8	m	1.64	52	19.3337	57	21.1927	5	1.85901	29.7143	1	m	m	1	0	54	20.0773	2	0.743605	0
562	0	5	0	2	3	1	m	-5	2	1	-2	m	31	2	m	2	2	2	0	0	3	9	1	1.57	45	18.2563	53	21.5019	8	3.24557	29.5714	2	0	1	m	m	m	m	m	m	m
563	0	2	0	2	31	8	m	-2	2	29	-23	m	32	2	1	3	2	1	1	0	2	10	2	1.6	53	20.7031	62	24.2188	9	3.51562	29.7143	2	1	1	m	m	m	m	m	m	m
564	0	1	5	3	m	m	3	4	-2	m	m	m	32	2	1	3	3	1	1	0	3	7	2	1.65	59	21.6713	71	26.079	12	4.40771	29.8571	2	1	2	0	0	57.5	21.1203	-1.5	-0.550964	1
565	0	9	5	17	11	m	14	-4	12	-6	m	m	34	1	1	3	3	1	1	0	3	8	m	1.6	53	20.7031	63	24.6094	10	3.90625	28	2	0	2	0	1	55	21.4844	2	0.78125	0
566	0	12	9	3	m	m	7	-3	-6	m	m	m	33	2	1	2	2	1	0	0	2	6	2	1.58	53	21.2306	70	28.0404	17	6.80981	29.1429	2	0	2	1	1	70	28.0404	17	6.80981	0
579	0	1	13	22	14	1	7	12	9	-8	-13	6	30	1	1	3	2	1	1	0	2	8	2	1.65	68	24.977	75	27.5482	7	2.57117	30.7143	2	3	3	0	0	60.5	22.2222	-7.5	-2.75482	1
582	1	11	21	14	5	18	35	10	-7	-9	13	17	39	2	1	3	2	1	0	1	2	7	1	1.65	54	19.8347	69	25.3444	15	5.50964	28.8571	1	7	4	1	0	60	22.0386	6	2.20386	0
583	0	6	5	6	6	3	8	-1	1	0	-3	5	29	2	0	3	3	1	1	0	2	5	2	1.6	44	17.1875	56	21.875	12	4.6875	29.8571	2	6	2	1	1	54	21.0938	10	3.90625	0
584	0	1	3	4	4	m	9	2	1	0	m	m	33	2	1	1	3	1	1	1	2	10	2	1.71	85	29.0688	72	24.623	-13	-4.44581	29.2857	2	0	1	0	0	65	22.2291	-20	-6.83971	1
585	1	22	29	11	m	m	29	7	-18	m	m	m	31	2	1	3	3	1	0	1	2	6	m	1.59	m	m	m	m	m	m	28.7143	2	7	4	0	1	60	23.7332	m	m	m
586	0	7	9	1	18	11	7	2	-8	17	-7	-4	29	1	1	3	2	2	1	0	2	8	1	1.6	58.5	22.8516	67	26.1719	8.5	3.32031	29	2	2	2	0	1	64	25	5.5	2.14844	0
587	0	20	15	7	6	14	18	-5	-8	-1	8	4	29	1	1	3	3	1	0	0	2	8	2	1.61	64	24.6904	72.5	27.9696	8.5	3.27919	30.8571	1	5	3	1	1	70	27.0051	6	2.31473	0
590	0	17	10	4	6	2	m	-7	-6	2	-4	m	29	1	1	2	1	1	1	0	2	8	2	1.57	50	20.2848	63	25.5588	13	5.27405	29.2857	2	0	3	m	m	m	m	m	m	m
594	1	m	13	13	m	m	19	m	0	m	m	m	m	2	m	m	m	m	m	m	m	m	1	m	m	m	m	m	m	m	m	1	2	3	0	0	62	m	m	m	m
595	0	7	20	6	4	7	m	13	-14	-2	3	m	34	2	1	3	3	1	1	0	2	7	2	1.66	65	23.5883	78	28.306	13	4.71767	30	1	6	4	m	m	m	m	m	m	m
596	0	8	15	10	14	9	10	7	-5	4	-5	1	33	2	0	2	2	1	1	0	1	6	2	1.63	58	21.83	70	26.3465	12	4.51654	29.2857	1	7	3	1	1	52	19.5717	-6	-2.25827	1
597	0	7	9	1	18	11	7	2	-8	17	-7	-4	29	1	1	3	2	2	1	0	2	8	1	1.6	58.5	22.8516	67	26.1719	8.5	3.32031	29	2	2	2	0	1	64	25	5.5	2.14844	0
598	0	8	13	8	9	13	5	5	-5	1	4	-8	28	2	0	1	2	1	0	0	2	7	2	1.56	50	20.5457	64	26.2985	14	5.75279	29.1429	2	2	3	0	1	50	20.5457	0	0	1
599	0	1	13	22	14	1	7	12	9	-8	-13	6	30	1	1	3	2	1	1	0	2	8	2	1.65	68	24.977	75	27.5482	7	2.57117	30.7143	2	3	3	0	0	60.5	22.2222	-7.5	-2.75482	1
600	0	2	3	0	5	1	1	1	-3	5	-4	0	30	2	0	1	1	1	1	0	2	8	m	1.61	74	28.5483	87	33.5635	13	5.01524	29	1	0	1	0	1	75.6	29.1655	1.6	0.61726	0
611	0	11	4	5	7	m	7	-7	1	2	m	m	33	2	1	3	3	1	0	0	1	9	1	1.63	51	19.1953	63	23.7118	12	4.51654	29.7143	2	2	1	0	1	54	20.3244	3	1.12914	0
612	0	5	1	8	4	7	m	-4	7	-4	3	m	33	2	1	3	3	1	0	1	2	8	1	1.65	53	19.4674	67	24.6097	14	5.14233	30.1429	2	0	1	m	m	m	m	m	m	m
613	0	10	8	28	19	9	4	-2	20	-9	-10	-5	36	2	0	3	3	1	1	0	2	8	1	1.61	54	20.8325	63	24.3046	9	3.47209	29.1429	2	0	2	0	1	55	21.2183	1	0.385788	0
614	0	12	1	3	19	6	m	-11	2	16	-13	m	26	2	1	3	2	1	0	1	3	8	1	1.61	43	16.5889	52	20.061	9	3.47209	28.2857	2	0	1	m	m	m	m	m	m	m
615	0	3	3	2	3	7	7	0	-1	1	4	0	31	2	0	3	2	1	0	1	2	9	m	1.64	69	25.6544	80	29.7442	11	4.08983	30	2	4	1	0	1	56	20.8209	-13	-4.83343	1
617	0	17	3	3	12	7	7	-14	0	9	-5	0	30	1	1	3	2	1	1	0	2	6	1	1.58	46	18.4265	55	22.0317	9	3.60519	29.8571	2	0	1	0	0	43	17.2248	-3	-1.20173	1
618	0	5	14	5	3	m	7	9	-9	-2	m	m	39	2	0	m	m	m	m	m	m	m	m	1.61	58	22.3757	66	25.462	8	3.0863	29.7143	2	0	3	1	1	50	19.2894	-8	-3.0863	1
619	0	16	8	9	m	m	3	-8	1	m	m	m	32	2	1	2	2	1	1	0	2	6	m	1.63	58	21.83	66	24.841	8	3.01103	28.5714	2	1	2	0	1	50	18.8189	-8	-3.01103	1
620	0	12	20	9	11	m	14	8	-11	2	m	m	31	2	1	2	2	1	0	1	3	8	1	1.66	72	26.1286	88	31.935	16	5.80636	30.2857	1	0	4	0	1	73	26.4915	1	0.362897	0
621	0	14	1	8	m	m	13	-13	7	m	m	m	37	1	1	3	2	1	1	0	2	8	1	1.68	53	18.7783	69	24.4473	16	5.66893	30.5714	2	0	1	1	1	52	18.424	-1	-0.354308	1
622	0	8	14	5	3	m	11	6	-9	-2	m	m	29	1	1	3	3	1	0	0	2	8	1	1.54	36	15.1796	45	18.9745	9	3.79491	29.5714	2	0	3	1	1	48	20.2395	12	5.05988	0
623	0	6	5	2	m	m	0	-1	-3	m	m	m	40	2	1	1	3	1	1	0	2	6	m	1.71	60.8	20.7927	65	22.2291	4.2	1.43634	29.2857	1	3	2	0	1	55	18.8092	-5.8	-1.98352	1
624	0	16	8	4	m	m	12	-8	-4	m	m	m	25	1	1	2	m	1	1	0	2	7	1	1.65	47	17.2635	61	22.4059	14	5.14233	27.1429	2	3	2	1	1	50	18.3655	3	1.10193	0
625	0	17	11	7	9	m	4	-6	-4	2	m	m	28	1	1	2	1	1	0	0	1	5	m	1.6	45	17.5781	55	21.4844	10	3.90625	30.4286	2	3	3	0	1	47.5	18.5547	2.5	0.976562	0
627	0	5	m	33	9	2	2	m	m	-24	-7	0	35	1	1	3	3	1	1	0	2	8	1	1.52	49.9	21.598	56.5	24.4546	6.6	2.85665	28.8571	m	m	m	0	1	49	21.2084	-0.9	-0.389543	1
639	0	5	0	4	5	m	5	-5	4	1	m	m	29	1	1	3	3	1	0	1	2	9	m	1.67	52	18.6453	63	22.5896	11	3.94421	29.7143	2	0	1	0	1	52	18.6453	0	0	1
640	0	5	2	7	13	m	6	-3	5	6	m	m	29	1	1	2	1	1	0	1	3	8	1	1.73	64	21.3839	68	22.7204	4	1.3365	29.2857	2	1	1	0	1	50	16.7062	-14	-4.67774	1
642	0	13	0	4	m	m	0	-13	4	m	m	m	28	1	1	2	2	1	1	0	2	8	1	1.65	47	17.2635	60	22.0386	13	4.77502	29	2	1	1	0	1	55	20.202	8	2.93848	0
644	0	13	5	5	2	6	14	-8	0	-3	4	8	28	1	1	3	1	1	m	0	2	6	2	1.63	62	23.3355	69	25.9701	7	2.63465	m	2	0	2	0	1	57.5	21.6418	-4.5	-1.6937	1
646	0	14	18	14	m	m	12	4	-4	m	m	m	29	2	1	3	3	1	0	1	2	5	1	1.73	70	23.3887	78	26.0617	8	2.67299	29.8571	2	4	4	1	1	68	22.7204	-2	-0.668248	1
647	0	18	3	9	12	m	m	-15	6	3	m	m	32	1	0	3	3	1	1	0	2	5	1	1.7	64.2	22.2145	85.41	29.5536	21.21	7.3391	29.2857	2	0	1	m	m	m	m	m	m	m
654	0	0	4	5	9	12	5	4	1	4	3	-7	23	1	0	1	1	1	1	0	3	9	2	1.72	62.1	20.9911	75	25.3515	12.9	4.36047	28.7143	2	0	1	0	0	70	23.6614	7.9	2.67036	0
657	0	12	6	8	18	10	10	-6	2	10	-8	0	33	1	1	2	2	1	0	1	2	8	1	1.62	49	18.6709	57	21.7193	8	3.04832	29.5714	2	0	2	0	1	49	18.6709	0	0	1
659	0	15	31	16	11	m	5	16	-15	-5	m	m	34	1	0	2	1	1	1	0	3	5	1	1.52	54	23.3726	64	27.7008	10	4.32825	29	2	2	4	1	1	55	23.8054	1	0.432825	0
660	0	15	7	3	4	12	7	-8	-4	1	8	-5	34	2	0	3	2	1	1	0	2	7	1	1.58	41	16.4237	51	20.4294	10	4.00577	29.2857	1	0	2	1	1	50	20.0288	9	3.60519	0
661	0	13	3	19	6	m	8	-10	16	-13	m	m	34	2	1	2	2	1	1	0	2	7	1	1.72	55	18.5911	64	21.6333	9	3.04218	29.8571	2	0	1	0	1	52	17.5771	-3	-1.01406	1
662	0	5	12	11	16	m	6	7	-1	5	m	m	36	2	1	3	2	1	1	1	3	9	1	1.62	55	20.9572	65	24.7676	10	3.81039	29.5714	2	2	3	0	1	55	20.9572	0	0	1
666	0	15	27	13	12	m	9	12	-14	-1	m	m	37	2	1	3	3	1	0	0	1	5	1	1.61	50	19.2894	63	24.3046	13	5.01524	29	2	8	4	1	1	49	18.9036	-1	-0.385788	1
678	0	18	10	4	m	m	3	-8	-6	m	m	m	37	2	1	3	2	1	1	1	2	6	1	1.63	53	19.9481	63	23.7118	10	3.76378	29.5714	2	0	3	0	1	55	20.7008	2	0.752757	0
682	0	6	4	7	3	m	m	-2	3	-4	m	m	24	1	1	3	2	1	0	0	3	8	2	1.68	49.7	17.6091	42.4	15.0227	-7.3	-2.58645	28.7143	1	0	1	m	m	m	m	m	m	m
683	0	11	35	m	5	22	5	24	m	m	17	-17	27	1	1	3	2	1	1	1	2	8	1	1.67	54	19.3625	62	22.231	8	2.86851	29.7143	1	8	4	1	1	55	19.721	1	0.358564	0
684	0	21	0	13	12	3	7	-21	13	-1	-9	4	31	1	1	2	2	1	1	0	3	9	1	1.66	53	19.2336	64.75	23.4976	11.75	4.26404	29	2	2	1	1	1	55	19.9594	2	0.725795	0
690	0	8	1	2	m	m	4	-7	1	m	m	m	30	1	0	3	2	1	1	0	2	8	m	1.68	57	20.1956	67	23.7387	10	3.54308	29.2857	2	0	1	0	1	50	17.7154	-7	-2.48016	1
694	0	4	3	4	m	m	7	-1	1	m	m	m	31	2	0	2	3	1	1	0	2	7	2	1.6	44	17.1875	51	19.9219	7	2.73438	29.2857	2	0	1	0	1	50	19.5312	6	2.34375	0
696	0	13	19	20	35	25	5	6	1	15	-10	-20	26	1	1	2	1	1	1	0	2	5	1	1.58	45	18.026	56	22.4323	11	4.40635	29.5714	2	6	4	0	1	50	20.0288	5	2.00288	0
698	0	7	3	2	11	3	6	-4	-1	9	-8	3	33	2	m	3	2	1	1	0	1	7	1	1.6	55	21.4844	67	26.1719	12	4.6875	29.1429	2	7	1	0	1	53	20.7031	-2	-0.78125	1
699	0	13	10	6	4	8	3	-3	-4	-2	4	-5	30	2	0	3	2	1	0	1	3	8	2	1.66	51	18.5078	64	23.2254	13	4.71767	29.1429	2	0	3	0	1	49	17.782	-2	-0.725795	1
723	0	m	8	7	15	3	12	m	-1	8	-12	9	m	2	m	m	m	m	m	m	m	m	1	m	m	m	m	m	m	m	m	2	2	2	1	1	54	m	m	m	m
726	0	4	6	2	m	m	11	2	-4	m	m	m	32	2	1	3	3	1	0	1	2	8	1	1.68	39	13.818	39.5	13.9952	0.5	0.177154	28.8571	1	0	2	1	1	48	17.0068	9	3.18878	0
730	0	4	2	m	1	m	m	-2	m	m	m	m	34	2	m	3	2	1	1	1	2	7	m	1.73	63	21.0498	78.5	26.2287	15.5	5.17892	29.8571	2	1	1	m	m	m	m	m	m	m
732	0	16	9	17	25	10	5	-7	8	8	-15	-5	32	2	1	3	3	1	1	0	2	7	2	1.6	44	17.1875	55	21.4844	11	4.29688	29	2	6	2	1	1	55	21.4844	11	4.29688	0
733	0	5	19	21	21	6	9	14	2	0	-15	3	34	1	1	2	2	1	0	0	1	8	2	1.65	49	17.9982	65	23.8751	16	5.87695	30.7143	2	3	4	0	1	54	19.8347	5	1.83655	0
734	0	16	15	17	11	m	5	-1	2	-6	m	m	30	2	1	2	1	1	1	1	3	6	1	1.63	63	23.7118	69	25.9701	6	2.25827	29.1429	1	5	3	1	1	50	18.8189	-13	-4.89292	1
736	0	7	7	5	5	m	6	0	-2	0	m	m	34	2	1	3	3	1	1	1	2	8	m	1.6	64	25	67	26.1719	3	1.17188	28	2	2	2	0	1	50	19.5312	-14	-5.46875	1
737	0	11	9	19	16	1	5	-2	10	-3	-15	4	26	1	1	3	3	1	1	0	2	6	1	1.62	67.54	25.7354	81	30.8642	13.46	5.12879	29.2857	2	3	2	0	0	66	25.1486	-1.54	-0.586801	1
739	0	25	5	9	5	m	6	-20	4	-4	m	m	29	2	1	3	1	2	0	0	2	6	1	1.66	54	19.5965	70	25.4028	16	5.80636	29.7143	1	3	2	0	1	50	18.1449	-4	-1.45159	1
744	0	m	1	8	m	m	11	m	7	m	m	m	32	2	1	3	m	1	1	m	m	m	m	1.6	60	23.4375	68	26.5625	8	3.125	29.1429	2	0	1	0	1	50	19.5312	-10	-3.90625	1
746	0	1	1	6	7	m	7	0	5	1	m	m	32	2	1	3	3	1	1	1	2	9	1	1.58	43	17.2248	51	20.4294	8	3.20461	29	1	0	1	0	1	46	18.4265	3	1.20173	0
747	0	9	2	5	9	7	m	-7	3	4	-2	m	32	1	0	2	2	1	1	0	2	7	1	1.64	46	17.1029	58	21.5645	12	4.46163	31.1429	2	0	1	m	m	m	m	m	m	m
748	0	5	19	21	21	6	9	14	2	0	-15	3	34	1	1	2	2	1	0	0	1	8	2	1.65	49	17.9982	65	23.8751	16	5.87695	30.7143	2	3	4	0	1	54	19.8347	5	1.83655	0
749	0	11	4	2	1	1	2	-7	-2	-1	0	1	32	2	1	3	3	1	0	1	3	8	2	1.58	54	21.6311	64	25.6369	10	4.00577	29.7143	2	0	1	1	0	56	22.4323	2	0.801154	0
750	0	8	24	6	10	m	9	16	-18	4	m	m	34	1	1	3	2	1	1	0	2	7	2	1.5	37	16.4444	48	21.3333	11	4.88889	29.7143	2	6	4	1	1	50	22.2222	13	5.77778	0
751	0	15	9	1	6	m	m	-6	-8	5	m	m	29	2	1	1	3	1	1	1	3	7	m	1.66	62	22.4996	74	26.8544	12	4.35477	28.2857	2	2	2	m	m	m	m	m	m	m
752	0	13	6	15	25	12	4	-7	9	10	-13	-8	31	1	1	3	2	1	0	0	2	7	1	1.65	53	19.4674	63.5	23.3242	10.5	3.85675	29.4286	2	4	2	1	m	61.5	22.5895	8.5	3.12213	0
771	0	10	3	5	12	m	5	-7	2	7	m	m	40	2	1	3	3	1	1	0	1	7	1	1.67	54	19.3625	60	21.5139	6	2.15139	29.2857	2	0	1	0	1	55	19.721	1	0.358564	0
772	0	5	2	4	3	m	7	-3	2	-1	m	m	30	2	1	3	3	1	1	0	2	10	m	1.66	48	17.4191	53	19.2336	5	1.81449	28.4286	2	0	1	1	1	50	18.1449	2	0.725795	0
774	0	14	6	9	9	m	m	-8	3	0	m	m	29	1	0	2	2	1	1	0	2	8	m	m	56	m	63	#VALUE!	7	#VALUE!	29.1429	2	2	2	m	m	m	m	m	m	m
775	0	13	17	26	28	4	12	4	9	2	-24	8	30	1	1	3	2	1	1	0	2	5	1	1.57	45	18.2563	55	22.3133	10	4.05696	28	2	1	4	0	0	46	18.662	1	0.405696	0
776	0	8	5	4	11	m	1	-3	-1	7	m	m	28	2	1	3	3	1	0	0	2	8	2	1.62	53	20.1951	64	24.3865	11	4.19143	30.5714	2	0	2	0	0	52	19.8141	-1	-0.381039	1
777	0	7	5	1	7	m	m	-2	-4	6	m	m	30	1	1	3	3	1	1	0	2	8	m	1.6	54	21.0938	64	25	10	3.90625	28.4286	2	0	2	m	m	m	m	m	m	m
779	0	21	m	m	m	m	7	m	m	m	m	m	28	2	1	3	3	1	0	0	2	6	m	1.66	51	18.5078	63	22.8625	12	4.35477	29	2	m	m	0	1	57	20.6852	6	2.17738	0
780	0	5	7	2	m	m	0	2	-5	m	m	m	30	1	1	3	3	1	0	0	2	6	m	1.66	54	19.5965	59	21.4109	5	1.81449	28.7143	2	0	2	0	1	50	18.1449	-4	-1.45159	1
781	0	1	6	10	15	m	m	5	4	5	m	m	32	1	1	3	1	1	1	0	2	9	1	1.65	48.5	17.8145	51	18.7328	2.5	0.918274	29.5714	2	0	2	m	m	m	m	m	m	m
782	0	15	4	5	m	m	13	-11	1	m	m	m	26	1	1	1	3	1	1	0	2	8	m	1.62	70	26.6728	86	32.7694	16	6.09663	29	2	0	1	0	0	80	30.4832	10	3.81039	0
783	0	13	17	26	28	4	12	4	9	2	-24	8	30	1	1	3	2	1	1	0	2	5	1	1.57	45	18.2563	55	22.3133	10	4.05696	28	2	1	4	0	0	46	18.662	1	0.405696	0
784	0	9	14	16	12	m	7	5	2	-4	m	m	29	1	1	3	3	1	0	1	3	7	1	1.56	48.75	20.0321	62	25.4767	13.25	5.44461	29.5714	2	3	3	0	1	50	20.5457	1.25	0.513642	0
785	0	0	11	2	m	m	1	11	-9	m	m	m	29	1	1	2	2	1	0	0	1	8	m	1.61	61	23.533	69	26.6193	8	3.0863	29.2857	2	0	3	0	1	63	24.3046	2	0.771575	0
786	0	16	19	16	7	m	m	3	-3	-9	m	m	24	2	0	1	1	1	1	0	2	9	1	1.63	58	21.83	70	26.3465	12	4.51654	29.8571	2	7	4	m	m	m	m	m	m	m
787	0	7	9	6	7	m	m	2	-3	1	m	m	28	1	1	3	2	1	1	0	2	7	m	1.63	48	18.0662	56	21.0772	8	3.01103	28.2857	2	0	2	m	m	m	m	m	m	m
789	0	9	12	5	6	m	m	3	-7	1	m	m	27	1	1	2	3	1	1	0	2	7	m	1.65	56	20.5693	68	24.977	12	4.40771	29.4286	2	0	3	m	m	m	m	m	m	m
791	0	13	5	5	2	6	14	-8	0	-3	4	8	28	1	1	3	1	1	m	0	2	6	2	1.66	60	21.7738	69	25.0399	9	3.26608	m	2	0	2	0	1	57.5	20.8666	-2.5	-0.907243	1
792	0	3	2	8	6	m	m	-1	6	-2	m	m	29	1	1	3	2	1	1	0	2	9	1	1.65	54	19.8347	61	22.4059	7	2.57117	28.1429	1	0	1	m	m	m	m	m	m	m
793	0	10	3	5	12	m	5	-7	2	7	m	m	40	2	1	3	3	1	1	0	1	7	1	1.67	54	19.3625	60	21.5139	6	2.15139	29.2857	2	0	1	0	1	55	19.721	1	0.358564	0
796	0	13	5	8	m	m	8	-8	3	m	m	m	26	2	1	3	1	1	0	0	2	7	m	1.68	60	21.2585	67	23.7387	7	2.48016	29	2	2	2	0	0	63	22.3214	3	1.06293	0
799	1	12	15	10	1	14	22	3	-5	-9	13	8	35	2	1	3	3	1	0	0	2	8	2	1.62	66.9	25.4915	74	28.1969	7.1	2.70538	27	2	0	3	0	0	62.5	23.815	-4.4	-1.67657	1
804	0	13	12	13	12	6	2	-1	1	-1	-6	-4	32	1	1	2	2	1	1	1	2	6	2	1.6	54	21.0938	64	25	10	3.90625	29.8571	2	2	3	0	1	60	23.4375	6	2.34375	0
814	0	7	5	2	1	m	1	-2	-3	-1	m	m	32	1	1	3	2	1	1	0	2	8	m	1.68	61	21.6128	67	23.7387	6	2.12585	29.2857	2	2	2	0	1	65	23.03	4	1.41723	0
832	0	9	11	25	14	5	m	2	14	-11	-9	m	30	2	1	3	3	1	1	0	3	9	1	1.6	60	23.4375	71	27.7344	11	4.29688	28.7143	1	0	3	m	m	m	m	m	m	m
833	0	12	24	9	13	7	10	12	-15	4	-6	3	30	1	1	3	3	1	1	1	2	7	2	1.62	50	19.052	61	23.2434	11	4.19143	29.5714	2	3	4	0	0	54	20.5761	4	1.52416	0
834	0	7	3	2	11	3	6	-4	-1	9	-8	3	33	2	m	3	2	1	1	0	1	7	1	1.62	55	20.9572	67	25.5296	12	4.57247	29.1429	2	7	1	0	1	53	20.1951	-2	-0.762079	1
836	0	11	12	m	13	11	8	1	m	m	-2	-3	30	1	1	3	3	1	0	1	m	5	2	1.6	45.5	17.7734	m	m	m	m	28	2	6	3	0	1	49	19.1406	3.5	1.36719	0
837	0	13	16	8	m	m	4	3	-8	m	m	m	34	2	0	3	2	1	1	0	3	9	1	1.6	69	26.9531	72	28.125	3	1.17188	28	2	5	4	1	1	70	27.3438	1	0.390625	0
850	0	19	1	4	m	m	1	-18	3	m	m	m	29	1	1	3	3	1	0	1	3	8	m	1.63	54	20.3244	64	24.0882	10	3.76378	28.5714	2	0	1	0	1	53	19.9481	-1	-0.376378	1
852	0	17	m	5	7	m	4	m	m	2	m	m	30	2	1	3	2	2	0	0	2	8	1	1.63	60	22.5827	69	25.9701	9	3.38741	29	2	1	m	0	1	64	24.0882	4	1.50551	0
853	0	12	23	7	36	m	8	11	-16	29	m	m	29	1	1	3	3	1	1	0	2	8	1	1.68	68.1	24.1284	80	28.3447	11.9	4.21627	28.7143	2	3	4	1	1	49	17.3611	-19.1	-6.76729	1
859	0	13	10	2	m	m	1	-3	-8	m	m	m	25	1	0	3	2	1	0	0	2	8	m	1.8	65	20.0617	77	23.7654	12	3.7037	28.4286	2	4	3	0	1	62	19.1358	-3	-0.925926	1
860	0	16	3	6	6	m	1	-13	3	0	m	m	35	1	1	1	1	1	m	0	1	6	m	1.63	70	26.3465	78	29.3575	8	3.01103	30.2857	2	0	1	0	1	65	24.4646	-5	-1.88189	1
863	0	15	12	4	26	m	m	-3	-8	22	m	m	28	1	1	3	2	1	1	0	2	7	2	1.58	45	18.026	58	23.2335	13	5.2075	28.4286	2	3	3	m	m	m	m	m	m	m
868	0	5	6	13	17	20	m	1	7	4	3	m	28	1	1	3	2	1	1	0	2	8	m	1.58	65	26.0375	72	28.8415	7	2.80404	29	2	3	2	m	m	m	m	m	m	m
871	0	3	4	5	13	5	2	1	1	8	-8	-3	28	1	1	3	3	1	0	0	2	7	2	1.71	63.45	21.699	77	26.3329	13.55	4.6339	28.8571	2	2	1	0	0	60	20.5191	-3.45	-1.17985	1
874	0	11	4	7	5	m	m	-7	3	-2	m	m	27	1	1	3	2	1	0	0	2	8	1	1.63	51	19.1953	63	23.7118	12	4.51654	29	2	0	1	m	m	m	m	m	m	m
877	0	13	12	13	12	6	2	-1	1	-1	-6	-4	32	1	1	2	2	1	1	1	2	6	2	1.6	54	21.0938	64	25	10	3.90625	29.8571	2	2	3	0	1	60	23.4375	6	2.34375	0
879	0	14	m	22	12	3	11	m	m	-10	-9	8	37	1	1	3	3	1	1	0	3	8	1	1.6	47	18.3594	54	21.0938	7	2.73438	29	m	m	m	0	0	52	20.3125	5	1.95312	0
884	0	9	6	3	m	m	4	-3	-3	m	m	m	31	1	1	3	2	1	1	0	2	8	2	1.69	75	26.2596	86	30.111	11	3.85141	29.4286	2	0	2	0	0	m	m	m	m	m
892	0	8	7	6	0	m	2	-1	-1	-6	m	m	27	1	1	3	2	1	1	1	3	8	2	1.63	61.5	23.1473	69	25.9701	7.5	2.82284	28.5714	2	5	2	1	0	65	24.4646	3.5	1.31732	0
893	0	26	6	19	m	m	12	-20	13	m	m	m	35	1	0	3	2	1	1	0	2	7	m	1.59	55	21.7555	78	30.8532	23	9.09774	29.5714	2	0	2	0	1	75	29.6665	20	7.91108	0
894	0	18	24	8	9	4	8	6	-16	1	-5	4	28	1	1	3	2	1	1	0	2	5	1	1.65	54.48	20.011	60	22.0386	5.52	2.02755	28	1	0	4	1	0	50	18.3655	-4.48	-1.64555	1
896	0	10	33	19	6	m	m	23	-14	-13	m	m	28	1	1	3	3	1	0	0	2	8	m	1.56	45	18.4911	62	25.4767	17	6.98554	30.1429	2	8	4	m	m	m	m	m	m	m
897	0	19	9	4	m	m	13	-10	-5	m	m	m	31	1	1	3	2	1	1	0	2	7	m	1.63	65	24.4646	73	27.4756	8	3.01103	29.2857	2	0	2	0	0	65	24.4646	0	0	1
899	0	8	8	4	6	m	14	0	-4	2	m	m	26	1	1	3	3	1	0	0	3	9	m	1.63	52	19.5717	58	21.83	6	2.25827	29.5714	2	0	2	0	1	52	19.5717	0	0	1
929	0	7	6	4	m	m	12	-1	-2	m	m	m	34	2	1	3	3	1	1	1	2	8	m	1.65	54	19.8347	62	22.7732	8	2.93848	28.4286	2	0	2	1	1	61.5	22.5895	7.5	2.75482	0
930	0	17	10	2	19	m	0	-7	-8	17	m	m	37	2	1	3	3	1	1	0	2	6	2	1.66	55	19.9594	63	22.8625	8	2.90318	29	2	3	3	0	1	60	21.7738	5	1.81449	0
931	0	18	9	13	11	m	m	-9	4	-2	m	m	28	1	1	3	2	1	1	0	1	6	1	1.66	63	22.8625	82	29.7576	19	6.89505	29.2857	1	1	2	m	m	m	m	m	m	m
934	0	3	4	6	4	m	1	1	2	-2	m	m	27	1	1	3	3	1	1	0	2	10	2	1.63	55	20.7008	66	24.841	11	4.14016	28.8571	2	0	1	0	1	60	22.5827	5	1.88189	0
935	0	12	6	25	19	m	m	-6	19	-6	m	m	30	1	1	3	2	1	1	0	2	7	m	1.75	55	17.9592	65	21.2245	10	3.26531	29.5714	2	3	2	m	m	m	m	m	m	m
937	0	0	0	2	13	8	0	0	2	11	-5	-8	37	2	1	3	3	1	0	0	2	8	2	1.65	62	22.7732	72	26.4463	10	3.67309	28.4286	2	0	1	0	1	70	25.7117	8	2.93848	0
942	0	19	23	16	19	5	6	4	-7	3	-14	1	27	1	1	2	3	1	1	0	2	6	2	1.66	51.2	18.5803	49.5	17.9634	-1.7	-0.616926	30.8571	1	2	4	1	1	65	23.5883	13.8	5.00798	0
948	0	7	4	7	5	m	m	-3	3	-2	m	m	31	1	1	3	3	1	1	1	2	8	m	1.62	56	21.3382	71	27.0538	15	5.71559	30	2	2	1	m	m	m	m	m	m	m
949	0	8	18	6	m	m	9	10	-12	m	m	m	32	1	1	3	3	1	1	0	2	8	m	1.58	53	21.2306	60	24.0346	7	2.80404	29	2	3	4	0	0	49	19.6283	-4	-1.60231	1
954	0	10	4	12	23	m	10	-6	8	11	m	m	29	1	0	3	2	1	1	0	2	7	2	1.6	53	20.7031	66	25.7812	13	5.07812	30.7143	2	0	1	1	0	56	21.875	3	1.17188	0
955	0	15	12	6	29	5	6	-3	-6	23	-24	1	30	1	0	3	2	1	0	0	2	9	m	1.6	50	19.5312	60	23.4375	10	3.90625	27.2857	2	3	3	0	1	55	21.4844	5	1.95312	0
959	0	4	7	12	3	m	m	3	5	-9	m	m	34	2	1	3	2	1	1	0	2	8	m	1.6	62	24.2188	68	26.5625	6	2.34375	30.2857	2	2	2	m	m	m	m	m	m	m
964	0	15	6	3	m	m	7	-9	-3	m	m	m	39	2	0	2	2	1	1	1	1	5	1	1.66	72	26.1286	80	29.0318	8	2.90318	29.1429	2	2	2	0	1	70	25.4028	-2	-0.725795	1
966	0	17	11	7	9	m	4	-6	-4	2	m	m	28	1	1	2	1	1	0	0	1	5	m	1.61	45	17.3604	55	21.2183	10	3.85788	30.4286	2	3	3	0	1	47.5	18.3249	2.5	0.964469	0
968	1	11	11	9	13	m	17	0	-2	4	m	m	31	1	1	3	2	1	1	1	1	5	m	1.68	57	20.1956	70	24.8016	13	4.60601	29	2	3	3	0	0	64.5	22.8529	7.5	2.65731	0
969	0	16	3	6	6	m	1	-13	3	0	m	m	35	1	1	1	1	1	m	0	1	6	m	1.63	70.5	26.5347	78	29.3575	7.5	2.82284	30.2857	2	0	1	0	1	65	24.4646	-5.5	-2.07008	1
972	0	10	1	10	19	8	9	-9	9	9	-11	1	29	1	1	1	1	1	1	0	2	8	1	1.66	63	22.8625	80	29.0318	17	6.16926	29.4286	1	0	1	1	1	65	23.5883	2	0.725795	0
978	0	6	9	10	m	m	5	3	1	m	m	m	39	2	1	3	2	1	1	1	2	9	m	1.57	55	22.3133	63	25.5588	8	3.24557	30.1429	2	0	2	0	1	53	21.5019	-2	-0.811392	1
979	0	25	11	4	21	m	m	-14	-7	17	m	m	32	2	1	2	2	1	0	1	2	7	1	1.55	54	22.4766	60	24.974	6	2.4974	30.5714	2	4	3	m	m	m	m	m	m	m
981	0	10	4	9	m	m	6	-6	5	m	m	m	36	2	1	3	2	1	1	1	2	8	m	1.55	55	22.8928	62	25.8065	7	2.91363	30.2857	2	0	1	1	0	54	22.4766	-1	-0.416233	1
982	0	8	14	7	m	m	12	6	-7	m	m	m	36	2	1	3	3	1	1	0	3	9	1	1.55	50	20.8117	58	24.1415	8	3.32986	29.7143	2	3	3	0	1	49	20.3954	-1	-0.416233	1
983	0	9	6	10	m	m	0	-3	4	m	m	m	29	2	0	m	m	m	m	m	3	8	2	1.62	60	22.8624	75	28.578	15	5.71559	30.7143	1	2	2	0	1	62.5	23.815	2.5	0.952599	0
984	0	5	9	4	11	m	4	4	-5	7	m	m	32	2	1	3	2	1	1	1	2	8	2	1.62	72	27.4348	81	30.8642	9	3.42936	30.4286	2	0	2	1	1	79	30.1021	7	2.66728	0
986	0	11	5	15	0	m	4	-6	10	-15	m	m	35	2	1	3	3	1	1	0	2	7	m	1.68	66	23.3844	71	25.1559	5	1.77154	30.7143	2	0	2	1	0	60.5	21.4357	-5.5	-1.9487	1
987	0	0	5	6	8	m	0	5	1	2	m	m	30	1	1	3	3	1	1	0	2	8	2	1.6	52	20.3125	60	23.4375	8	3.125	30.5714	2	2	2	0	1	55	21.4844	3	1.17188	0
990	0	12	8	16	16	7	2	-4	8	0	-9	-5	30	1	1	3	3	1	0	0	1	4	1	1.63	77	28.9811	88	33.1213	11	4.14016	29	2	3	2	0	1	74	27.852	-3	-1.12914	1
993	0	10	1	10	19	8	9	-9	9	9	-11	1	29	1	1	1	1	1	1	0	2	8	1	1.66	63	22.8625	80	29.0318	17	6.16926	29.4286	1	0	1	1	1	65	23.5883	2	0.725795	0
994	0	0	7	12	m	m	3	7	5	m	m	m	30	1	1	3	3	1	1	0	3	9	m	1.68	56	19.8413	68	24.093	12	4.2517	30.5714	2	1	2	0	1	54	19.1327	-2	-0.708617	1
1015	0	5	3	2	20	5	2	-2	-1	18	-15	-3	32	1	1	2	2	2	1	0	3	8	2	1.62	57.2	21.7955	67.7	25.7964	10.5	4.00091	28	2	0	1	0	0	61	23.2434	3.8	1.44795	0
1016	0	25	5	9	5	m	6	-20	4	-4	m	m	29	2	1	3	1	2	0	0	2	6	1	1.66	54	19.5965	70	25.4028	16	5.80636	29.7143	1	3	2	0	1	50	18.1449	-4	-1.45159	1
1020	0	18	3	5	19	m	6	-15	2	14	m	m	30	1	1	3	1	1	1	0	2	7	1	1.66	59.58	21.6214	70	25.4028	10.42	3.78139	29.1429	2	0	1	0	1	55	19.9594	-4.58	-1.66207	1
1022	0	15	m	m	8	m	8	m	m	m	m	m	21	1	0	1	1	1	0	0	1	6	m	1.6	52	20.3125	67	26.1719	15	5.85938	30	m	m	m	1	1	49	19.1406	-3	-1.17188	1
1024	0	3	16	12	4	8	1	13	-4	-8	4	-7	30	1	1	2	2	1	1	0	2	8	1	1.6	60	23.4375	72	28.125	12	4.6875	29.7143	1	5	4	0	1	65	25.3906	5	1.95312	0
1025	0	8	24	6	10	m	9	16	-18	4	m	m	34	1	1	3	2	1	1	0	2	7	2	1.5	37	16.4444	48	21.3333	11	4.88889	29.7143	2	6	4	1	1	50	22.2222	13	5.77778	0
1029	0	3	2	25	3	m	10	-1	23	-22	m	m	30	1	1	2	3	1	1	0	3	10	m	1.67	55	19.721	61	21.8724	6	2.15139	28.8571	2	0	1	1	1	53	19.0039	-2	-0.717129	1
1031	0	7	6	11	m	m	9	-1	5	m	m	m	31	1	1	2	3	1	1	1	3	7	2	1.58	48	19.2277	58	23.2335	10	4.00577	29.7143	1	3	2	0	1	55	22.0317	7	2.80404	0
1032	0	10	17	16	19	14	7	7	-1	3	-5	-7	35	1	1	3	3	1	1	0	2	8	2	1.74	68	22.46	80	26.4236	12	3.96354	28.7143	2	4	4	0	0	67	22.1297	-1	-0.330295	1
1036	0	9	13	8	m	m	0	4	-5	m	m	m	42	2	0	1	2	1	1	1	2	8	1	1.53	50	21.3593	58	24.7768	8	3.41749	28	2	3	3	1	1	48	20.5049	-2	-0.854372	1
1038	0	2	5	5	11	6	5	3	0	6	-5	-1	29	1	1	3	2	1	1	0	2	10	1	1.58	38.9	15.5824	50	20.0288	11.1	4.4464	29	2	2	2	0	1	57	22.8329	18.1	7.25044	0
1039	0	17	4	1	7	m	12	-13	-3	6	m	m	33	1	1	3	1	1	1	0	2	5	m	1.63	47	17.6898	57	21.4536	10	3.76378	29.1429	2	0	1	1	1	55	20.7008	8	3.01103	0
1041	0	12	23	7	36	m	8	11	-16	29	m	m	29	1	1	3	3	1	1	0	2	8	1	1.69	69	24.1588	80	28.0102	11	3.85141	28.7143	2	3	4	1	1	49	17.1563	-20	-7.00256	1
1042	0	13	12	9	6	m	m	-1	-3	-3	m	m	32	2	1	2	3	1	1	0	2	7	1	1.7	65	22.4913	77	26.6436	12	4.15225	29.5714	1	4	3	m	m	m	m	m	m	m
1043	0	17	23	15	12	22	m	6	-8	-3	10	m	37	2	0	1	1	2	1	0	2	6	1	1.61	63	24.3046	75	28.9341	12	4.62945	29.4286	2	0	4	m	m	m	m	m	m	m
1044	0	2	2	3	11	14	9	0	1	8	3	-5	32	1	1	3	2	1	1	0	3	9	1	1.63	53	19.9481	65	24.4646	12	4.51654	29	2	2	1	0	1	50	18.8189	-3	-1.12914	1
1045	0	7	14	6	m	m	0	7	-8	m	m	m	32	2	1	3	3	1	1	1	2	6	m	1.61	46	17.7462	56	21.6041	10	3.85788	30.4286	2	3	3	0	1	52	20.061	6	2.31473	0
1046	0	9	7	9	10	m	10	-2	2	1	m	m	27	1	1	3	2	1	1	1	2	6	2	1.63	63	23.7118	70	26.3465	7	2.63465	29.4286	1	2	2	1	1	55	20.7008	-8	-3.01103	1
1047	0	7	10	11	m	m	0	3	1	m	m	m	32	1	1	3	2	1	1	0	2	7	1	1.66	60	21.7738	70	25.4028	10	3.62897	28.1429	2	0	3	0	1	50	18.1449	-10	-3.62897	1
1048	0	10	5	6	7	m	8	-5	1	1	m	m	25	1	0	3	1	1	1	1	2	8	m	1.63	65	24.4646	77	28.9811	12	4.51654	30.7143	2	0	2	0	1	55	20.7008	-10	-3.76378	1
1049	0	18	24	8	9	4	8	6	-16	1	-5	4	28	1	1	3	2	1	1	0	2	5	1	1.75	54	17.6327	60	19.5918	6	1.95918	28	1	0	4	1	0	50	16.3265	-4	-1.30612	1
1051	0	0	5	9	m	m	7	5	4	m	m	m	26	1	1	3	2	1	1	0	3	10	m	1.65	54	19.8347	60	22.0386	6	2.20386	29.8571	2	0	2	1	1	51	18.7328	-3	-1.10193	1
1059	1	3	2	24	18	4	18	-1	22	-6	-14	14	36	1	1	3	2	1	1	0	2	8	2	1.62	57	21.7193	70	26.6728	13	4.95351	29.5714	2	0	1	0	0	60	22.8624	3	1.14312	0
1061	1	4	m	7	15	8	23	m	m	8	-7	15	25	1	1	3	2	1	1	1	2	8	1	1.6	56	21.875	60	23.4375	4	1.5625	29.4286	m	m	m	1	0	52	20.3125	-4	-1.5625	1
1062	0	7	18	3	17	m	9	11	-15	14	m	m	38	1	1	3	2	2	1	0	2	8	m	1.58	59	23.634	68	27.2392	9	3.60519	29.8571	1	4	4	1	1	52	20.83	-7	-2.80404	1
1065	0	12	12	5	18	m	3	0	-7	13	m	m	28	1	1	2	2	1	1	0	2	7	1	1.62	45	17.1468	57	21.7193	12	4.57247	29.1429	1	10	3	0	1	47	17.9089	2	0.762079	0
1066	0	10	19	2	8	m	7	9	-17	6	m	m	22	1	0	1	1	1	1	0	1	8	1	1.6	49	19.1406	55	21.4844	6	2.34375	29.8571	1	4	4	0	1	50	19.5312	1	0.390625	0
1069	0	8	5	8	12	m	11	-3	3	4	m	m	31	2	1	3	2	1	1	0	2	7	2	1.6	55	21.4844	61	23.8281	6	2.34375	29.4286	2	1	2	1	1	55	21.4844	0	0	1
1070	0	7	3	6	8	m	4	-4	3	2	m	m	35	1	1	3	2	1	1	0	2	7	2	1.7	62	21.4533	70	24.2215	8	2.76817	29.1429	2	1	1	1	0	62	21.4533	0	0	1
1088	0	8	14	10	4	2	1	6	-4	-6	-2	-1	32	1	1	3	2	1	1	0	2	8	1	1.63	68	25.5937	75	28.2284	7	2.63465	29	2	0	3	0	0	70	26.3465	2	0.752757	0
1089	0	4	9	2	m	m	7	5	-7	m	m	m	31	1	1	3	2	1	1	0	3	8	m	1.58	54	21.6311	63	25.2363	9	3.60519	29.8571	2	6	2	1	1	53	21.2306	-1	-0.400577	1
1091	0	15	16	6	3	m	10	1	-10	-3	m	m	37	2	0	1	2	1	0	1	2	7	m	1.63	54	20.3244	64	24.0882	10	3.76378	30.8571	2	4	4	0	1	54	20.3244	0	0	1
1093	0	2	5	6	7	m	8	3	1	1	m	m	25	1	1	2	2	1	0	0	2	8	2	1.66	54	19.5965	63	22.8625	9	3.26608	29.7143	2	1	2	0	1	55	19.9594	1	0.362897	0
1095	0	2	3	6	10	m	m	1	3	4	m	m	33	1	1	3	3	1	1	0	2	9	2	1.63	57	21.4536	67	25.2174	10	3.76378	29.1429	2	0	1	m	m	m	m	m	m	m
1096	0	0	12	6	4	14	4	12	-6	-2	10	-10	m	1	1	3	2	1	1	m	2	8	1	1.6	59.5	23.2422	59	23.0469	-0.5	-0.195312	28.7143	2	0	3	0	1	52.5	20.5078	-7	-2.73438	1
1097	0	12	6	11	4	m	7	-6	5	-7	m	m	33	1	1	3	3	1	1	1	2	8	2	1.56	50	20.5457	60	24.6548	10	4.10914	29.2857	2	4	2	1	1	54	22.1893	4	1.64366	0
1099	0	12	11	3	4	6	8	-1	-8	1	2	2	29	1	1	3	3	1	1	0	3	8	2	1.62	50.5	19.2425	58.5	22.2908	8	3.04832	28.2857	2	0	3	0	0	51	19.433	0.5	0.19052	0
1100	0	24	3	10	30	m	m	-21	7	20	m	m	29	2	0	3	2	1	0	0	2	7	1	1.73	85	28.4005	90	30.0712	5	1.67062	29.5714	2	0	1	m	m	m	m	m	m	m
1102	0	3	2	5	15	7	2	-1	3	10	-8	-5	30	1	1	2	2	2	1	0	2	8	2	1.68	57	20.1956	67	23.7387	10	3.54308	29.5714	2	0	1	0	1	m	m	m	m	m
1103	0	9	10	11	7	m	m	1	1	-4	m	m	30	1	1	3	3	1	1	0	3	8	1	1.6	56	21.875	66	25.7812	10	3.90625	29.5714	1	3	3	m	m	m	m	m	m	m
1112	0	12	13	6	11	m	m	1	-7	5	m	m	30	1	1	2	2	1	1	0	1	7	2	1.61	55	21.2183	62	23.9188	7	2.70051	30	2	1	3	m	m	m	m	m	m	m
1114	0	7	26	9	8	9	6	19	-17	-1	1	-3	36	1	1	2	1	1	1	0	2	7	2	1.7	60	20.7612	72	24.9135	12	4.15225	29.2857	2	0	4	0	1	70	24.2215	10	3.46021	0
1116	0	13	10	22	m	m	7	-3	12	m	m	m	34	1	1	2	2	1	1	0	1	8	2	1.58	70	28.0404	80	32.0461	10	4.00577	29.8571	2	0	3	0	0	60	24.0346	-10	-4.00577	1
1117	0	14	15	4	12	m	m	1	-11	8	m	m	32	2	1	3	3	1	1	0	2	6	m	1.65	57	20.9366	70	25.7117	13	4.77502	29.2857	2	4	3	m	m	m	m	m	m	m
1118	0	13	19	9	32	m	m	6	-10	23	m	m	27	1	1	2	1	1	1	0	3	7	1	1.62	57	21.7193	66	25.1486	9	3.42936	29.4286	2	6	4	m	m	m	m	m	m	m
1119	0	24	16	7	5	7	9	-8	-9	-2	2	2	28	1	1	3	3	1	1	0	3	5	2	1.58	61	24.4352	65.5	26.2378	4.5	1.8026	30.7143	2	0	4	0	0	59.3	23.7542	-1.7	-0.680981	1
1121	0	7	4	2	10	m	m	-3	-2	8	m	m	26	1	1	3	1	1	1	0	2	7	m	1.63	46	17.3134	58	21.83	12	4.51654	29.5714	2	0	1	m	m	m	m	m	m	m
1124	0	0	3	1	3	m	m	3	-2	2	m	m	31	2	1	3	3	1	0	0	3	8	2	1.6	50	19.5312	58	22.6562	8	3.125	28.7143	2	0	1	m	m	m	m	m	m	m
1130	0	12	11	3	4	6	8	-1	-8	1	2	2	29	1	1	3	3	1	1	0	3	8	2	1.62	50.5	19.2425	58.5	22.2908	8	3.04832	28.2857	2	0	3	0	0	51	19.433	0.5	0.19052	0
1131	0	16	5	15	23	6	15	-11	10	8	-17	9	35	2	1	3	3	1	1	1	2	9	2	1.72	75	25.3515	89	30.0838	14	4.73229	28.4286	2	3	2	0	0	80	27.0416	5	1.6901	0
1133	0	11	12	5	5	m	7	1	-7	0	m	m	37	1	1	3	2	1	1	0	2	8	2	1.66	65	23.5883	80	29.0318	15	5.44346	29	2	2	3	0	1	70	25.4028	5	1.81449	0
1134	0	13	11	18	14	m	m	-2	7	-4	m	m	41	1	1	3	1	1	0	0	2	7	2	1.6	44	17.1875	54	21.0938	10	3.90625	29.5714	2	3	3	m	m	m	m	m	m	m
1135	0	13	22	17	5	6	7	9	-5	-12	1	1	33	2	1	3	3	1	0	1	1	7	2	1.65	71	26.079	75	27.5482	4	1.46924	29.7143	2	0	4	0	0	80	29.3848	9	3.30579	0
1136	0	24	16	7	5	7	9	-8	-9	-2	2	2	28	1	1	3	3	1	1	0	3	5	2	1.58	61	24.4352	65.5	26.2378	4.5	1.8026	30.7143	2	0	4	0	0	59.3	23.7542	-1.7	-0.680981	1
1137	0	25	19	16	10	18	14	-6	-3	-6	8	-4	31	1	1	3	3	1	1	0	1	6	1	1.55	44	18.3143	52.05	21.6649	8.05	3.35068	28.4286	2	0	4	1	0	42	17.4818	-2	-0.832466	1
1138	0	20	33	12	29	16	15	13	-21	17	-13	-1	40	1	1	3	2	1	1	0	3	8	2	1.52	43	18.6115	55.6	24.0651	12.6	5.4536	29.7143	2	6	4	1	1	51	22.0741	8	3.4626	0
1139	0	12	12	8	4	8	10	0	-4	-4	4	2	28	1	0	3	2	1	1	0	2	6	1	1.65	51	18.7328	64	23.5078	13	4.77502	28.4286	2	5	3	0	1	48	17.6309	-3	-1.10193	1
1140	0	12	25	8	10	m	m	13	-17	2	m	m	37	1	1	3	m	m	m	0	3	7	2	1.55	47	19.563	56	23.3091	9	3.7461	29	2	2	4	m	m	m	m	m	m	m
1141	0	12	13	0	2	0	0	1	-13	2	-2	0	32	1	1	3	2	1	0	0	2	7	1	1.65	53.12	19.5115	60	22.0386	6.88	2.52709	30.2857	2	4	3	0	0	50	18.3655	-3.12	-1.14601	1
1142	0	14	6	7	4	6	5	-8	1	-3	2	-1	26	1	1	3	2	1	0	0	3	8	2	1.56	45	18.4911	51.5	21.1621	6.5	2.67094	28.1429	2	2	2	0	1	45	18.4911	0	0	1
1147	0	7	2	6	16	m	m	-5	4	10	m	m	27	1	1	2	3	1	1	0	2	8	2	1.65	52	19.1001	69	25.3444	17	6.24426	29.1429	2	0	1	m	m	m	m	m	m	m
1148	0	11	9	1	8	m	4	-2	-8	7	m	m	28	2	1	3	2	1	0	0	2	8	2	1.63	51	19.1953	60	22.5827	9	3.38741	27.2857	2	0	2	0	0	m	m	m	m	m
1149	0	7	16	7	12	m	m	9	-9	5	m	m	30	1	0	3	2	1	1	0	2	6	1	1.65	46	16.8962	56	20.5693	10	3.67309	29.1429	2	4	4	m	m	m	m	m	m	m
1150	0	7	m	m	23	10	11	m	m	m	-13	1	34	2	0	1	1	2	0	0	1	6	1	1.59	81	32.0399	87	34.4132	6	2.37332	29.7143	m	m	m	0	1	82.5	32.6332	1.5	0.593331	0
631	0	13	22	17	5	6	7	9	-5	-12	1	1	33	2	1	3	3	1	0	1	1	7	2	1.65	71	26.079	75	27.5482	4	1.46924	29.7143	2	0	4	0	0	80	29.3848	9	3.30579	0
632	0	8	3	12	11	m	m	-5	9	-1	m	m	23	1	0	1	m	1	1	m	m	m	1	1.58	53	21.2306	61	24.4352	8	3.20461	28	2	0	1	m	m	m	m	m	m	m
704	0	19	9	6	9	m	m	-10	-3	3	m	m	31	2	0	3	1	1	0	0	2	6	m	1.58	60	24.0346	70	28.0404	10	4.00577	28.2857	2	2	2	m	m	m	m	m	m	m
711	0	8	17	17	3	17	4	9	0	-14	14	-13	29	1	1	3	2	1	1	0	2	8	1	1.68	56	19.8413	67	23.7387	11	3.89739	29	2	3	4	0	0	56	19.8413	0	0	1
445	0	5	14	5	3	m	7	9	-9	-2	m	m	39	2	0	m	m	m	m	m	m	m	m	1.6	58	22.6562	66	25.7812	8	3.125	29.7143	2	0	3	1	1	50	19.5312	-8	-3.125	1
447	0	13	10	8	29	m	m	-3	-2	21	m	m	34	2	0	3	2	1	1	1	3	8	2	1.52	49	21.2084	58	25.1039	9	3.89543	29.5714	2	2	3	m	m	m	m	m	m	m
315	0	25	19	16	10	18	14	-6	-3	-6	8	-4	31	1	1	3	3	1	1	0	1	6	1	1.53	44.32	18.9329	52.05	22.235	7.73	3.30215	28.4286	2	0	4	1	0	42	17.9418	-2.32	-0.991072	1
318	0	m	1	1	18	6	m	m	0	17	-12	m	m	1	m	m	m	m	m	m	m	m	2	m	m	m	m	m	m	m	m	2	0	1	m	m	m	m	m	m	m
226	0	m	5	6	11	4	m	m	1	5	-7	m	m	2	m	m	m	m	m	m	m	m	1	m	m	m	m	m	m	m	m	2	4	2	m	m	m	m	m	m	m
