# Supplementary material for: Trajectory patterns and factors influencing perinatal fatigue among Chinese women from late pregnancy to 6 months after delivery
Source: PeerJ. 2022 May 26;10:e13387. doi: 10.7717/peerj.13387 (PMC9148558; doi:10.7717/peerj.13387)
Supplement: Supplemental Information 2 [file peerj-10-13387-s002.xlsx]

## Sheet: Sheet1
统计
		Fatigue at T0 (scores 0-39, m=missing data)	Fatigue at T1(scores 0-39, m=missing data)	Fatigue at T2(scores 0-39, m=missing data)	Fatigue at T3(scores 0-39, m=missing data)	Fatigue at T4(scores 0-39, m=missing data)	Fatigue at T5(scores 0-39, m=missing data)	疲乏10	疲乏21	疲乏32	疲乏43	疲乏54	Age(range 18~42, m=missing)	Sleep Quality(range 0~10, m=missing)	height(range 1.50~1.80, m=missing)	prenatalweight	PrenatalBMI	Weight at T0(range 42.4~94.00, m=missing)	BMI at T0(range 15.06~36.57, m=missing)	WeightGainatT0	BMIGainatT0	Gestation at enrollment(range 27.00~31.14, m=missing)	Pain(score 0~10, m=missing)	WeightatT5
个案数	有效	1009	917	970	781	563	779	896	895	726	560	386	1016	1015	1021	1008	1007	1008	1007	997	996	1014	914	758
	缺失	21	113	60	249	467	251	134	135	304	470	644	14	15	9	22	23	22	23	33	34	16	116	272
平均值		9.85927	10.3173	9.78866	11.7081	9.25222	7.85751	0.633929	-0.658101	1.73416	-2.80536	-0.733161	30.4321	7.43448	1.62686	55.5932	20.9815	64.9829	24.5257	9.39055	3.55179	29.172	2.07112	57.0313
标准 偏差		5.60948	7.76698	7.1513	7.96993	7.50755	6.38958	7.75994	8.08909	9.09746	9.61288	7.93767	3.64689	1.19309	0.0491916	8.22932	2.81567	8.63966	2.93788	3.42525	1.28639	0.733651	2.32147	8.29743
偏度		0.737179	0.880767	1.16408	0.946796	1.33155	1.49329	0.351047	0.0476933	0.181229	0.409718	0.0360066	0.357808	-0.35238	0.147987	0.736388	0.793316	0.480298	0.460688	-0.321114	-0.288566	-0.132343	0.86325	0.860848
偏度标准误差		0.0769991	0.0807574	0.0785271	0.0874819	0.10296	0.0875937	0.0816952	0.0817406	0.090722	0.103234	0.124195	0.0767342	0.0767719	0.0765466	0.0770372	0.0770753	0.0770372	0.0770753	0.0774597	0.0774985	0.0768096	0.0808894	0.0887941
峰度		0.698745	0.184877	1.11495	0.454588	1.53759	2.57171	0.476029	0.726111	0.782817	0.0702108	1.25013	0.295718	0.585001	0.284603	1.06062	1.17605	0.416473	0.70141	3.94144	3.81775	0.267146	-0.365698	0.862815
峰度标准误差		0.153847	0.16134	0.156894	0.174742	0.20556	0.174965	0.16321	0.1633	0.181197	0.206105	0.24776	0.153319	0.153394	0.152945	0.153923	0.153999	0.153923	0.153999	0.154765	0.154843	0.153469	0.161603	0.177357
百分位数	25	6	4	5	6	4	4	-4	-5	-3	-9	-5	28	7	1.6	50	19.14	59	22.48	7	2.77	28.71	0	51
	50	9	9	8	10	7	7	0	0	1	-4	0	30	8	1.63	55	20.7	64.75	24.31	9	3.585	29.14	2	55
	75	13	15	13	17	13	10	5	4	6	3	3	33	8	1.66	60	22.66	70	26.17	11.55	4.33	29.57	3	61.625

## Sheet: Sheet2
Descriptive statistics of continuous variables in this study
Variables	Number of subjects	Mean	SD	skewness	SE of skewness	Z-score of skewness	kurtosis	SE of kurtosis	Z-score of kurtosis	P25	P50	P75
Fatigue at T0	1009	9.85927	5.60948	0.737179	0.0769991	9.57387	0.698745	0.153847	4.54182	6	9	13
Fatigue at T1	917	10.3173	7.76698	0.880767	0.0807574	10.9063	0.184877	0.16134	1.14588	4	9	15
Fatigue at T2	970	9.78866	7.1513	1.16408	0.0785271	14.8239	1.11495	0.156894	7.10638	5	8	13
Fatigue at T3	781	11.7081	7.96993	0.946796	0.0874819	10.8228	0.454588	0.174742	2.60148	6	10	17
Fatigue at T4	563	9.25222	7.50755	1.33155	0.10296	12.9326	1.53759	0.20556	7.48001	4	7	13
Fatigue at T5	779	7.85751	6.38958	1.49329	0.0875937	17.048	2.57171	0.174965	14.6984	4	7	10
T1-T0 Fatigue	896	0.633929	7.75994	0.351047	0.0816952	4.29704	0.476029	0.16321	2.91667	-4	0	5
T2-T1 Fatigue	895	-0.658101	8.08909	0.0476933	0.0817406	0.583471	0.726111	0.1633	4.44648	-5	0	4
T3-T2 Fatigue	726	1.73416	9.09746	0.181229	0.090722	1.99763	0.782817	0.181197	4.32025	-3	1	6
T4-T3 Fatigue	560	-2.80536	9.61288	0.409718	0.103234	3.96883	0.0702108	0.206105	0.340656	-9	-4	3
T5-T4 Fatigue	386	-0.733161	7.93767	0.0360066	0.124195	0.28992	1.25013	0.24776	5.04571	-5	0	3
Age	1016	30.4321	3.64689	0.357808	0.0767342	4.66296	0.295718	0.153319	1.92878	28	30	33
Sleep Quality	1015	7.43448	1.19309	-0.35238	0.0767719	-4.58997	0.585001	0.153394	3.81372	7	8	8
height	1021	1.62686	0.0491916	0.147987	0.0765466	1.9333	0.284603	0.152945	1.86083	1.6	1.63	1.66
Prenatal weight	1008	55.5932	8.22932	0.736388	0.0770372	9.55886	1.06062	0.153923	6.8906	50	55	60
Prenatal BMI	1007	20.9815	2.81567	0.793316	0.0770753	10.2927	1.17605	0.153999	7.63673	19.14	20.7	22.66
Weight at T0	1008	64.9829	8.63966	0.480298	0.0770372	6.23463	0.416473	0.153923	2.70573	59	64.75	70
BMI at T0	1007	24.5257	2.93788	0.460688	0.0770753	5.97711	0.70141	0.153999	4.55465	22.48	24.31	26.17
Weight Gain at T0	997	9.39055	3.42525	-0.321114	0.0774597	-4.14556	3.94144	0.154765	25.4672	7	9	11.55
BMI Gain at T0	996	3.55179	1.28639	-0.288566	0.0774985	-3.7235	3.81775	0.154843	24.6557	2.77	3.585	4.33
Gestation at enrollment	1014	29.172	0.733651	-0.132343	0.0768096	-1.723	0.267146	0.153469	1.74072	28.71	29.14	29.57
Pain	914	2.07112	2.32147	0.86325	0.0808894	10.672	-0.365698	0.161603	-2.26293	0	2	3
Weight at T5	758	57.0313	8.29743	0.860848	0.0887941	9.69488	0.862815	0.177357	4.86486	51	55	61.625
